# Supplementary material for: Autocrine Effects of Brain Endothelial Cell-Produced Human Apolipoprotein E on Metabolism and Inflammation in vitro
Source: Front Cell Dev Biol. 2021 Jun 10;9:668296. doi: 10.3389/fcell.2021.668296 (PMC8225247; doi:10.3389/fcell.2021.668296)
Supplement: Supplementary file 2 [file Table_1.XLSX]

## Sheet: F1. BEC Characterization
Figure 1B. Cell Density at Confluence										Figure 1C. BrdU
		t	df	p-value								t	df	p-value
		0.01028	54	0.9918								0.7034	10	0.4979
		Isolation Number	Genotype	Sex	Growth Area	Cell Count (Cells/Well)	Cell Count at Confluence (105 Cells/cm2)					Isolation Number	Genotype	Sex	Growth Area	Total Cells	BrdU+ Cells	BrdU+ Cells (%)
		311	E3	M	96 Well	23419.8	70969.2					742	E3	M	96 Well	40224.5	1655	4.11441
		312	E3	M	96 Well	35805.5	108502					743	E3	M	96 Well	37238	1720	4.61894
		313	E3	F	96 Well	28293.5	85737.9					744	E3	M	96 Well	33134	1839	5.55019
		314	E3	F	96 Well	28418.2	86115.7					745	E3	F	96 Well	32640	1586	4.85907
		333	E3	M	96 Well	19832	60097					746	E3	F	96 Well	34016	1318	3.87465
		334	E3	M	96 Well	23111	70033.3					747	E3	F	96 Well	36711.5	1158	3.15432
		335	E3	M	96 Well	21710	65787.9					748	E4	M	96 Well	34043	1461	4.29163
		336	E3	F	96 Well	23450	71060.6					749	E4	M	96 Well	36002	1197	3.32482
		337	E3	F	96 Well	26137	79203					750	E4	M	96 Well	35639	1388	3.89461
		338	E3	F	96 Well	20323	61584.8					751	E4	F	96 Well	30904.5	1158.5	3.74865
		376	E3	M	96 Well	22681	68730.3					752	E4	F	96 Well	30184	1294	4.28704
		377	E3	M	96 Well	26372	79915.2					753	E4	F	96 Well	25546	1252	4.90096
		378	E3	M	96 Well	26217	79445.5
		379	E3	F	96 Well	33186	100564
		380	E3	F	96 Well	29092	88157.6			Figure 1E. Baseline TEER Max
		381	E3	F	96 Well	27758	84115.2
		649	E3	M	96 Well	33003	100009									t	df	p-value		t	df	p-value		t	df	p-value
		650	E3	M	96 Well	23002	69703									0.6374	10	0.5382		1.769	10	0.1073		3.642	10	0.0045
		651	E3	M	96 Well	32647	98930.3					Isolation Number	Genotype	Sex	Growth Area		R4000 Hz TEERMax (W)				R2000 Hz TEERMax (W)				R1000 Hz TEERMax (W)
		652	E3	F	96 Well	31163	94433.3					1006	E3	M	96w10idf		4431.43				6904.88				10350.9
		653	E3	F	96 Well	22769	68997					1007	E3	M	96w10idf		4759.83				7400.53				10150
		654	E3	F	96 Well	24723	74918.2					1008	E3	M	96w10idf		4567.22				7119.44				10046.1
		910	E3	M	96 Well	32663.4	98979.9					1009	E3	F	96w10idf		4823.73				7252.2				10326.2
		911	E3	M	96 Well	27562.8	83523.7					1010	E3	F	96w10idf		4737.31				7544.48				10956.3
		912	E3	M	96 Well	28970.8	87790.2					1011	E3	F	96w10idf		4593.37				7455.57				10460.7
		913	E3	F	96 Well	29528	89478.8					1012	E4	M	96w10idf		4758.13				7260.25				10113.7
		914	E3	F	96 Well	22852.3	69249.4					1013	E4	M	96w10idf		4734.72				7157.64				9915.12
		915	E3	F	96 Well	26167.9	79296.5					1014	E4	M	96w10idf		4780.32				7035.82				9645.65
		315	E4	M	96 Well	22353	67736.4					1015	E4	F	96w10idf		4512.26				6876.84				9423
		316	E4	M	96 Well	26549.3	80452.5					1016	E4	F	96w10idf		4732.5				7079.75				9801.95
		317	E4	F	96 Well	28089	85118.2					1017	E4	F	96w10idf		4670.59				7096.65				9852.68
		318	E4	F	96 Well	28621.5	86731.8
		382	E4	M	96 Well	29051	88033.3
		383	E4	M	96 Well	35704	108194
		384	E4	M	96 Well	33047	100142
		385	E4	F	96 Well	36400	110303
		386	E4	F	96 Well	38798	117570
		387	E4	F	96 Well	30380	92060.6
		655	E4	M	96 Well	17979	54481.8
		656	E4	M	96 Well	23311	70639.4
		657	E4	M	96 Well	28092	85127.3
		658	E4	F	96 Well	29553	89554.5
		659	E4	F	96 Well	24360	73818.2
		660	E4	F	96 Well	23376	70836.4
		339	E4	M	96 Well	25612	77612.1
		340	E4	M	96 Well	27790	84212.1
		341	E4	M	96 Well	24425	74015.2
		342	E4	F	96 Well	23446	71048.5
		343	E4	F	96 Well	24692	74824.2
		344	E4	F	96 Well	20025	60681.8
		916	E4	M	96 Well	24919.6	75514.1
		917	E4	M	96 Well	27111.4	82155.9
		918	E4	M	96 Well	29054.3	88043.5
		919	E4	F	96 Well	26726.9	80990.8
		920	E4	F	96 Well	21156.4	64110.4
		921	E4	F	96 Well	20591.8	62399.3

## Sheet: F2. ApoE Levels
Figure 2C. Cell-Associated ApoE Levels
								t	df	p-value		t	df	p-value
								2.414	10	0.0364		3.433	10	0.0064
		Isolation Number	Genotype	Sex	Growth Area	Sample Amount (µg)	Actin (O.D.)	ApoE 34 kDa (O.D.)	ApoE 34 kDa:Actin			ApoE 36 kDa (O.D.)	ApoE3 36 kDa:Actin
		94	E3	M	T25	17	13.0459	3.96188	0.303687			2.44913	0.187732
		146	E3	M	T25	17	15.1896	4.19515	0.276185			3.01927	0.198772
		168	E3	M	T25	17	16.2478	4.49419	0.276603			3.36343	0.207008
		147	E3	F	T25	17	14.3492	2.70189	0.188296			2.30058	0.160328
		169	E3	F	T25	17	13.7972	3.83407	0.277887			3.28441	0.238048
		173	E3	F	T25	17	13.2141	2.9586	0.223896			2.6333	0.199279
		95	E4	M	T25	17	14.1983	3.26403	0.229888			2.53841	0.178783
		96	E4	M	T25	17	15.9995	2.42479	0.151554			2.08232	0.130149
		97	E4	M	T25	17	15.5032	3.46006	0.223183			2.39288	0.154347
		98	E4	F	T25	17	14.0728	2.82804	0.200958			2.13433	0.151664
		99	E4	F	T25	17	9.2727	2.18107	0.235214			1.59964	0.172511
		100	E4	F	T25	17	12.2217	2.34441	0.191823			1.66645	0.136351
		175	KO	M	T25	17	16.4555	-0.0013833	-8.40636e-05			-0.00782442	-0.000475491
Figure 2D. Extracellular ApoE
								t	df	p-value		t	df	p-value		t	df	p-value
								4.737	10	0.0008		4.391	10	0.0014		2.981	10	0.0138
		Isolation Number	Genotype	Sex	Growth Area	Sample Volume (µl)	Cell Count	ApoE (O.D.)	ApoE 34 kDa (O.D./103 Cells)			ApoE (O.D.)	ApoE 36 kDa (O.D./103 Cells)			ApoE (O.D.)	ApoE ~95 kDa (O.D./103 Cells)
		333	E3	M	96 Well	10.5	19832	0.152431	0.00768613			0.135009	0.00680764			0.847024	0.04271
		334	E3	M	96 Well	10.5	23111	0.160958	0.00696457			0.133961	0.00579641			0.547935	0.0237088
		335	E3	M	96 Well	10.5	21710	0.191189	0.00880649			0.149587	0.00689024			0.539783	0.0248634
		336	E3	F	96 Well	10.5	23450	0.141614	0.00603896			0.120305	0.00513029			0.475229	0.0202656
		337	E3	F	96 Well	10.5	26137	0.167703	0.00641629			0.134842	0.00515903			0.419004	0.0160311
		338	E3	F	96 Well	10.5	20323	0.18256	0.00898292			0.156002	0.00767611			0.630323	0.0310152
		339	E4	M	96 Well	10.5	25612	0.144434	0.0056393			0.123917	0.00483823			0.390912	0.0152628
		340	E4	M	96 Well	10.5	27790	0.124143	0.00446717			0.104489	0.00375996			0.308433	0.0110987
		341	E4	M	96 Well	10.5	24425	0.110443	0.0045217			0.092544	0.0037889			0.317115	0.0129832
		342	E4	F	96 Well	10.5	23446	0.124669	0.00531727			0.106735	0.00455235			0.333811	0.0142374
		343	E4	F	96 Well	10.5	24692	0.0769355	0.00311581			0.0667965	0.00270519			0.236215	0.00956646
		344	E4	F	96 Well	10.5	20025	0.0856208	0.00427569			0.0812482	0.00405734			0.419107	0.0209292
Figure 2E. Extracellular ApoE ELISA
								t	df	p-value
								8.922	10	<0.0001
		Isolation Number	Genotype	Sex	Growth Area	Media Volume (ml)	Cell Count	ApoE (ng/ml)	Total ApoE (ng)	ApoE (ng/103 Cells)
		333	E3	M	96 Well	0.2	19832	54.7006	10.9401	0.55164
		334	E3	M	96 Well	0.2	23111	58.5077	11.7015	0.506319
		335	E3	M	96 Well	0.2	21710	57.1362	11.4272	0.526359
		336	E3	F	96 Well	0.2	23450	62.5466	12.5093	0.533447
		337	E3	F	96 Well	0.2	26137	68.149	13.6298	0.521475
		338	E3	F	96 Well	0.2	20323	53.523	10.7046	0.526723
		339	E4	M	96 Well	0.2	25612	60.3348	12.067	0.471145
		340	E4	M	96 Well	0.2	27790	61.5625	12.3125	0.443055
		341	E4	M	96 Well	0.2	24425	53.0188	10.6038	0.434136
		342	E4	F	96 Well	0.2	23446	51.0977	10.2195	0.435876
		343	E4	F	96 Well	0.2	24692	57.2301	11.446	0.463552
		344	E4	F	96 Well	0.2	20025	43.3417	8.66834	0.432876

## Sheet: F3. RNA Seq Manual Sorting
Geneid	Gene name	Transcript ID(s)	Transcript type	E4/E3 : logFC	E4/E3 : logCPM	E4/E3 : PValue	E4/E3 : QValue	Name	Function	Link to a paper for us	Major Category	Subcat. Code	Sub Cat assignment	F3	General endothelial cell function/other notes	Key words
ENSMUSG00000022579	Gpihbp1	ENSMUST00000189944.6,ENSMUST00000190119.6,ENSMUST00000189874.1,ENSMUST00000023243.10,ENSMUST00000186934.1	retained_intron,protein_coding	-0.813548	4.65907	6.0818e-07	0.00014697	Glycosylphosphatidylinositol Anchored High Density Lipoprotein Binding Protein 1	This gene encodes a capillary endothelial cell protein that facilitates the lipolytic processing of triglyceride-rich lipoproteins. The encoded protein is a glycosylphosphatidylinositol-anchored protein that is a member of the lymphocyte antigen 6 (Ly6) family. This protein plays a major role in transporting lipoprotein lipase (LPL) from the subendothelial spaces to the capillary lumen. Mutations…	https://pubmed.ncbi.nlm.nih.gov/18787041/	Metabolism	1.1	Lipoprotein		Key for LPL localization to lumen and lipid metabolism, also PPARy induced	lipoprotein lipase localization to lumen, HDL, chylomicrons and triglyceride metabolism and lipid homeostasis, PPARg
ENSG00000130203	APOE	ENST00000485628.2,ENST00000425718.1,ENST00000434152.5,ENST00000252486.8,ENST00000446996.5	retained_intron,protein_coding	-0.561828	9.94142	3.58161e-09	6.55677e-06	Apolipoprotein E			Metabolism	1.1	Lipoprotein			ApoE, lipoprotein
ENSMUSG00000017754	Pltp	ENSMUST00000128110.1,ENSMUST00000109316.7,ENSMUST00000059954.13,ENSMUST00000156255.7,ENSMUST00000142603.7,ENSMUST00000109317.9,ENSMUST00000148912.1	processed_transcript,retained_intron,protein_coding	-0.288655	8.45274	0.000114839	0.00517212	Phospholipid transfer protein	Facilitates the transfer of a spectrum of different lipid molecules, including diacylglycerol, phosphatidic acid, sphingomyelin, phosphatidylcholine, phosphatidylglycerol, cerebroside and phosphatidyl ethanolamine. Essential for the transfer of excess surface lipids from triglyceride-rich lipoproteins to HDL, thereby facilitating the formation of smaller lipoprotein remnants, contributing to the …	https://www.ncbi.nlm.nih.gov/pubmed/10224231	Metabolism	1.1	Lipoprotein		prevents vascular endothelial dysfunction: 12454263. alpha-tocopherol through a net mass transfer reaction may play at least two distinct beneficial roles in preventing endothelium damage. Read https://www.jbc.org/content/289/8/4683 Production of HDL-liek proteins into the brain!!!!	Lipoprotein synthesis and modelling.
ENSMUSG00000027253	Lrp4	ENSMUST00000151907.1,ENSMUST00000123897.7,ENSMUST00000028689.3,ENSMUST00000143874.7	processed_transcript,protein_coding	-0.255911	4.17047	0.00190105	0.0369268	LDL Receptor Related Protein 4	Mediates SOST-dependent inhibition of bone formation. Functions as a specific facilitator of SOST-mediated inhibition of Wnt signaling. Plays a key role in the formation and the maintenance of the neuromuscular junction (NMJ), the synapse between motor neuron and skeletal muscle. Directly binds AGRIN and recruits it to the MUSK signaling complex. Mediates the AGRIN-induced phosphorylation of MUSK…	https://www.sciencedirect.com/science/article/pii/S2211124719308022 https://elifesciences.org/articles/00220	Metabolism	1.1	Lipoprotein			wnt signaling, LRP4, apoE
ENSMUSG00000044197	Gpr146	ENSMUST00000051293.7,ENSMUST00000188655.1,ENSMUST00000137254.1,ENSMUST00000053120.4,ENSMUST00000138631.1,ENSMUST00000100514.2	processed_transcript,protein_coding	-0.243743	7.0455	0.000523417	0.0151005	G Protein-Coupled Receptor 146	GPR146 (G Protein-Coupled Receptor 146) is a Protein Coding gene. Gene Ontology (GO) annotations related to this gene include G protein-coupled receptor activity. An important paralog of this gene is RXFP3.	https://pubmed.ncbi.nlm.nih.gov/32491159/?from_term=Gpr146&from_sort=pubdate&from_pos=1	Metabolism	1.1	Lipoprotein		Here we demonstrate that orphan G protein-coupled receptor 146 (GPR146) promotes activity of hepatic sterol regulatory element binding protein 2 (SREBP2) through activation of the extracellular signal-regulated kinase (ERK) signaling pathway, thereby regulating hepatic very low-density lipoprotein (VLDL) secretion, and subsequently circulating low-density lipoprotein cholesterol (LDL-C) and trigl…	Triglycerides, cholesterol, lipoprotein cholesterol
ENSMUSG00000057342	Sphk2	ENSMUST00000072836.6,ENSMUST00000210060.1,ENSMUST00000211340.1,ENSMUST00000107737.10	protein_coding	-0.160166	5.9253	0.0015816	0.0325802	Sphingosine Kinase 2	Catalyzes the phosphorylation of sphingosine to form sphingosine-1-phosphate (SPP), a lipid mediator with both intra- and extracellular functions. Also acts on D-erythro-dihydrosphingosine, D-erythro-sphingosine and L-threo-dihydrosphingosine. Binds phosphoinositides (PubMed:19168031, PubMed:12954646). In contrast to prosurvival SPHK1, has a positive effect on intracellular ceramide levels, inhib…	https://pubmed.ncbi.nlm.nih.gov/16118219/	Metabolism	1.1	Lipoprotein		Lipoprotein - Produce sphingosine-1-phosphate that assovciates with HDL	Sphingosine, Inhibit growth and apoptosis, promote calcium into the mitochondria for cytochrome C release
ENSMUSG00000022614	Lmf2	ENSMUST00000023283.5	protein_coding	0.184891	7.57319	0.00038932	0.0123722	Lipase Maturation Factor 2	Involved in the maturation of specific proteins in the endoplasmic reticulum. May be required for maturation and transport of active lipoprotein lipase (LPL) through the secretory pathway (By similarity).		Metabolism	1.1	Lipoprotein			Lipoprotein lipsase transport and trafficking
ENSMUSG00000032193	Ldlr	ENSMUST00000217111.1,ENSMUST00000215917.1,ENSMUST00000214359.1,ENSMUST00000213114.1,ENSMUST00000217613.1,ENSMUST00000214549.1,ENSMUST00000034713.8	retained_intron,protein_coding	0.199812	6.58258	0.00095983	0.0232699	Low Density Lipoprotein Receptor	The low density lipoprotein receptor (LDLR) gene family consists of cell surface proteins involved in receptor-mediated endocytosis of specific ligands. Low density lipoprotein (LDL) is normally bound at the cell membrane and taken into the cell ending up in lysosomes where the protein is degraded and the cholesterol is made available for repression of microsomal enzyme 3-hydroxy-3-methylglutaryl…	https://www.ncbi.nlm.nih.gov/pmc/articles/PMC4807419/ https://pubmed.ncbi.nlm.nih.gov/20458492/	Metabolism	1.1	Lipoprotein		Endocytosis of LDL	apoE, LDLR, lipoprotein endocytosis
ENSMUSG00000024030	Abcg1	ENSMUST00000024829.6,ENSMUST00000139013.1	retained_intron,protein_coding	0.349864	5.41976	1.77462e-07	7.12192e-05	ATP-binding cassette sub-family G member 1	Catalyzes the efflux of phospholipids such as sphingomyelin, cholesterol and its oxygenated derivatives like 7beta-hydroxycholesterol and this transport is coupled to hydrlysis of ATP (PubMed:17408620, PubMed:24576892). The lipid efflux is ALB-dependent (PubMed:16702602). Is an active component of the macrophage lipid export complex. Could also be involved in intracellular lipid transport process…	https://www.sciencedirect.com/science/article/pii/S155041310500029X https://www.pnas.org/content/108/49/19719 https://www.pnas.org/content/108/49/19719	Metabolism	1.1	Lipoprotein		This may be unique in moving cholesterol/modulating intracellular cholesterol levels, including in endosomes. Remove cholesterol from endosomes?	Lipoprotein, APOE, ABCG1, intracellualr organelle cholesterol
ENSMUSG00000022548	Apod	ENSMUST00000156456.7,ENSMUST00000023207.14,ENSMUST00000115230.1,ENSMUST00000145837.1,ENSMUST00000155682.1,ENSMUST00000130560.7	retained_intron,protein_coding	0.456269	8.71097	5.64879e-05	0.00308133	Apolipoprotein D	This gene encodes a component of high density lipoprotein that has no marked similarity to other apolipoprotein sequences. It has a high degree of homology to plasma retinol-binding protein and other members of the alpha 2 microglobulin protein superfamily of carrier proteins, also known as lipocalins. This glycoprotein is closely associated with the enzyme lecithin:cholesterol acyltransferase - …	https://www.ncbi.nlm.nih.gov/pmc/articles/PMC3191092/ https://www.ncbi.nlm.nih.gov/pmc/articles/PMC3691099/ https://www.ncbi.nlm.nih.gov/pmc/articles/PMC2784685/ https://www.ncbi.nlm.nih.gov/pubmed/28182653	Metabolism	1.1	Lipoprotein		ApoD is consistently found upregulated with aging and in neurodegenerative disorders. Promotes HDL maturation, and associates closely with LCAT. Induced by ROS and LPS. Lysosomal Ph regulation	Lipoprotein remodeling, lipid binding, HDL maturation, lysosome
ENSMUSG00000029759	Pon3	ENSMUST00000156848.7,ENSMUST00000125686.7,ENSMUST00000176039.1,ENSMUST00000176948.2,ENSMUST00000031773.8,ENSMUST00000129344.7	nonsense_mediated_decay,processed_transcript,retained_intron,protein_coding	0.489587	2.96963	1.07097e-05	0.000960399	Paraoxonase 3	This gene is a member of the paraoxonase family and lies in a cluster on chromosome 7 with the other two family members. The encoded protein is secreted into the bloodstream and associates with high-density lipoprotein (HDL). The protein also rapidly hydrolyzes lactones and can inhibit the oxidation of low-density lipoprotein (LDL), a function that is believed to slow the initiation and progressi…	https://www.ahajournals.org/doi/full/10.1161/01.atv.21.4.542	Metabolism	1.1	Lipoprotein		Also ROS in mitochondria	HDL binding, inhibit oxidation of LDL
ENSMUSG00000022037	Clu	ENSMUST00000152903.1,ENSMUST00000128539.7,ENSMUST00000138191.7,ENSMUST00000153460.7,ENSMUST00000127387.7,ENSMUST00000144619.1,ENSMUST00000138665.1,ENSMUST00000146990.1,ENSMUST00000022616.12	nonsense_mediated_decay,retained_intron,protein_coding	0.684043	3.15724	3.43859e-06	0.000454582	Clusterin	Functions as extracellular chaperone that prevents aggregation of non native proteins (PubMed:11123922, PubMed:19535339). Prevents stress-induced aggregation of blood plasma proteins (PubMed:11123922, PubMed:12176985, PubMed:17260971, PubMed:19996109). Inhibits formation of amyloid fibrils by APP, APOC2, B2M, CALCA, CSN3, SNCA and aggregation-prone LYZ variants (in vitro) (PubMed:12047389, PubMed…	https://www.ahajournals.org/doi/10.1161/atvbaha.109.190058 https://www.ncbi.nlm.nih.gov/pubmed/24097125	Metabolism	1.1	Lipoprotein		antiproliferative, cytoprotective in endothelial cells potentiates TGFb signaling	Lipid metabolism, inflammation, ROS
ENSMUSG00000040466	Blvrb	ENSMUST00000207799.1,ENSMUST00000153644.1,ENSMUST00000133750.7,ENSMUST00000108358.7,ENSMUST00000108357.7,ENSMUST00000037399.15	processed_transcript,retained_intron,protein_coding	-0.65763	5.23597	5.24051e-09	6.92796e-06	Biliverdin Reductase B	Broad specificity oxidoreductase that catalyzes the NADPH-dependent reduction of a variety of flavins, such as riboflavin, FAD or FMN, biliverdins, methemoglobin and PQQ (pyrroloquinoline quinone). Contributes to heme catabolism and metabolizes linear tetrapyrroles. Can also reduce the complexed Fe(3+) iron to Fe(2+) in the presence of FMN and NADPH. In the liver, converts biliverdin to bilirubin.	https://pubmed.ncbi.nlm.nih.gov/20430037/	Metabolism	1.2	Oxidative Stress	Ion Heme/Fe	20430037- Heme oxygenase-1 (HO-1) is highly protective in various pathophysiological states such as cardiovascular and neurodegenerative diseases. HO-1-derived bilirubin is an efficient scavenger of reactive oxygen and nitrogen species (RONS).	Mitochondria, Heme oxygenase,
ENSMUSG00000015452	Ager	ENSMUST00000172932.1,ENSMUST00000174640.7,ENSMUST00000184805.7,ENSMUST00000173589.7,ENSMUST00000184846.7,ENSMUST00000015596.9,ENSMUST00000174069.7,ENSMUST00000174554.7,ENSMUST00000173551.7,ENSMUST00000173992.7,ENSMUST00000174496.8,ENSMUST00000172757.7,ENSMUST00000170161.7	nonsense_mediated_decay,processed_transcript,retained_intron,protein_coding	-0.465171	2.24933	0.000311957	0.0104141	Receptor Advanced Glycosylation End-Product Specific Receptor/RAGE	The advanced glycosylation end product (AGE) receptor encoded by this gene is a member of the immunoglobulin superfamily of cell surface receptors. It is a multiligand receptor, and besides AGE, interacts with other molecules implicated in homeostasis, development, and inflammation, and certain diseases, such as diabetes and Alzheimer's disease. Many alternatively spliced transcript variants enco…		Metabolism	1.2	Oxidative Stress		ROS	In general this receptor is considered detrimetal for endothelial cell function,	Extracellualr matrix production, higher ROS, higher inflamamtion
ENSMUSG00000022199	Slc22a17	ENSMUST00000050772.7	protein_coding	-0.418755	3.31544	2.52904e-05	0.00175968	Solute Carrier Family 22 Member 17, lipocalin-2 receptor	Cell surface receptor for LCN2 (24p3) that plays a key role in iron homeostasis and transport. Able to bind iron-bound LCN2 (holo-24p3), followed by internalization of holo-24p3 and release of iron, thereby increasing intracellular iron concentration and leading to inhibition of apoptosis. SLC22A17 (Solute Carrier Family 22 Member 17) is a Protein Coding gene. Diseases associated with SLC22A17 in…		Metabolism	1.2	Oxidative Stress	Ion Heme/Fe	Hard one to predict substrate. In general lipocalins are invloved in inflammation and detoxification. Range from phermomes, prostaglandins, retanoids	lipocalin, iron
ENSMUSG00000060803	Gstp1	ENSMUST00000169613.2	protein_coding	-0.377157	6.22255	4.12882e-09	6.55677e-06	Glutathione S-Transferase Pi 1	Glutathione S-transferases (GSTs) are a family of enzymes that play an important role in detoxification by catalyzing the conjugation of many hydrophobic and electrophilic compounds with reduced glutathione.	https://www.karger.com/Article/PDF/486918	Metabolism	1.2	Oxidative Stress	glutathione		This also inhbits stress fiber formation and permeability disruption, Nrf2	Glutatione, ROS, detoxification, Heme, inflammation
ENSMUSG00000038393	Txnip	ENSMUST00000128221.1,ENSMUST00000151832.1,ENSMUST00000049093.7,ENSMUST00000144639.1,ENSMUST00000196871.1,ENSMUST00000074519.12	processed_transcript,retained_intron,protein_coding	-0.282937	9.88204	2.73946e-05	0.00184885	Thioredoxin Interacting Protein	Gene encodes a thioredoxin-binding protein that is a member of the alpha arrestin protein family. Thioredoxin is a thiol-oxidoreductase that is a major regulator of cellular redox signaling which protects cells from oxidative stress. This protein inhibits the antioxidative function of thioredoxin resulting in the accumulation of reactive oxygen species and cellular stress. This protein also funct…	https://onlinelibrary.wiley.com/doi/full/10.1111/acel.12836 https://www.ncbi.nlm.nih.gov/pmc/articles/PMC5543564/	Metabolism	1.2	Oxidative Stress		ros	Promotes inflamamtion in endothelial cells	ROS, insulin signaling, ER stress, glucose uptake and metabolism, lipid metabolism
ENSMUSG00000032350	Gclc	ENSMUST00000216315.1,ENSMUST00000034905.8,ENSMUST00000216848.1	processed_transcript,protein_coding	-0.260228	6.10668	8.15394e-08	4.16481e-05	Glutamate-Cysteine Ligase Catalytic Subunit	Glutamate-cysteine ligase, also known as gamma-glutamylcysteine synthetase is the first rate-limiting enzyme of glutathione (GSH) synthesis. The enzyme consists of two subunits, a heavy catalytic subunit and a light regulatory subunit. This locus encodes the catalytic subunit, while the regulatory subunit is derived from a different gene located on chromosome 1p22-p21. Mutations at this locus hav…	https://pubmed.ncbi.nlm.nih.gov/17109620/	Metabolism	1.2	Oxidative Stress	glutathione		Will result in low GSH levels (antioxidant)	GSH, ROS
ENSMUSG00000000811	Txnrd3	ENSMUST00000000828.12,ENSMUST00000101171.1	protein_coding	-0.260104	4.86223	0.00020696	0.00777796	Thioredoxin Reductase 3	The protein encoded by this gene belongs to the pyridine nucleotide-disulfide oxidoreductase family, and is a member of the thioredoxin (Trx) system. Three thioredoxin reductase (TrxR) isozymes are found in mammals. TrxRs are selenocysteine-containing flavoenzymes, which reduce thioredoxins, as well as other substrates, and play a key role in redox homoeostasis. This gene encodes the third TrxR, …		Metabolism	1.2	Oxidative Stress		glutathione		ROS,
ENSMUSG00000035139	Secisbp2	ENSMUST00000127360.1,ENSMUST00000153877.1,ENSMUST00000146011.1,ENSMUST00000154202.7,ENSMUST00000110044.1,ENSMUST00000040117.14	processed_transcript,retained_intron,protein_coding	-0.244308	5.14332	1.40974e-05	0.0012001	SECIS Binding Protein 2	The protein encoded by this gene is one of the essential components of the machinery involved in co-translational insertion of selenocysteine (Sec) into selenoproteins. Sec is encoded by the UGA codon, which normally signals translation termination. The recoding of UGA as Sec codon requires a Sec insertion sequence (SECIS) element; present in the 3' untranslated regions of eukaryotic selenoprotei…	https://www.ncbi.nlm.nih.gov/pmc/articles/PMC3408893/	Metabolism	1.2	Oxidative Stress		selenoproteins	insertion of selenocysteine (Sec) into selenoproteins. NRF2	Selenocycteine, NRF2,
ENSMUSG00000032519	Slc25a38	ENSMUST00000139079.7,ENSMUST00000144768.7,ENSMUST00000150093.7,ENSMUST00000135514.1,ENSMUST00000035106.11,ENSMUST00000154969.1,ENSMUST00000137522.7	nonsense_mediated_decay,processed_transcript,protein_coding	-0.235521	4.64312	0.000994414	0.0237079	Solute Carrier Family 25 Member 38/Mitochondrial Glycine Transporter GlyC	Mitochondrial glycine transporter that imports glycine into the mitochondrial matrix. Plays an important role in providing glycine for the first enzymatic step in heme biosynthesis, the condensation of glycine with succinyl-CoA to produce 5-aminolevulinate (ALA) in the mitochondrial matrix. Required during erythropoiesis.	https://www.pnas.org/content/99/23/14807	Metabolism	1.2	Oxidative Stress	Ion Heme/Fe	mitochondria	Mitochondria, heme production, produce ALA
ENSMUSG00000058135	Gstm1	ENSMUST00000126593.2,ENSMUST00000198532.1,ENSMUST00000153314.7,ENSMUST00000004140.10	processed_transcript,protein_coding	-0.232793	9.35637	0.000107804	0.00496471	Glutathione S-Transferase Mu 1	Cytosolic and membrane-bound forms of glutathione S-transferase are encoded by two distinct supergene families. At present, eight distinct classes of the soluble cytoplasmic mammalian glutathione S-transferases have been identified: alpha, kappa, mu, omega, pi, sigma, theta and zeta. This gene encodes a glutathione S-transferase that belongs to the mu class. The mu class of enzymes functions in t…	https://www.ncbi.nlm.nih.gov/pmc/articles/PMC2685347/	Metabolism	1.2	Oxidative Stress	glutathione		Low levels = less able to cope with ROS?	Glutatione, ROS, detoxification, Heme, inflammation
ENSMUSG00000062729	Ppox	ENSMUST00000152689.7,ENSMUST00000145019.1,ENSMUST00000151442.1,ENSMUST00000192956.2,ENSMUST00000155083.7,ENSMUST00000073120.10,ENSMUST00000133050.1,ENSMUST00000126765.1	processed_transcript,retained_intron,protein_coding	-0.222349	5.25585	0.000458846	0.0138232	Protoporphyrinogen Oxidase	This gene encodes the penultimate enzyme of heme biosynthesis, which catalyzes the 6-electron oxidation of protoporphyrinogen IX to form protoporphyrin IX. Mutations in this gene cause variegate porphyria, an autosomal dominant disorder of heme metabolism resulting from a deficiency in protoporphyrinogen oxidase, an enzyme located on the inner mitochondrial membrane. Alternatively spliced transcr…		Metabolism	1.2	Oxidative Stress	Ion Heme/Fe		Heme, mitochondria
ENSMUSG00000033318	Gstt2	ENSMUST00000038257.6,ENSMUST00000218500.1,ENSMUST00000218646.1,ENSMUST00000220195.1,ENSMUST00000218745.1,ENSMUST00000220440.1,ENSMUST00000218034.1,ENSMUST00000219343.1	processed_transcript,retained_intron,protein_coding	-0.214391	4.84396	0.00260509	0.0458118	Glutathione S-Transferase Theta 2	The protein encoded by this gene, glutathione S-transferase (GST) theta 2 (GSTT2), is a member of a superfamily of proteins that catalyze the conjugation of reduced glutathione to a variety of electrophilic and hydrophobic compounds. Human GSTs can be divided into five main classes: alpha, mu, pi, theta, and zeta. The theta class includes GSTT1, GSTT2, and GSTT2B. GSTT2 and GSTT2B are nearly iden…		Metabolism	1.2	Oxidative Stress	glutathione			Glutathione, ROS, detoxification, Heme, inflammation
ENSMUSG00000005413	Hmox1	ENSMUST00000159631.2,ENSMUST00000005548.7	retained_intron,protein_coding	-0.206732	7.91357	0.000280139	0.00965621	Heme oxygenase	Heme oxygenases (HO; encoded by HMOX genes) are evolutionarily conserved enzymes that catabolize heme, that is, iron (Fe) protoporphyrin (IX), into equimolar amounts of labile Fe, carbon monoxide (CO), and biliverdin (1).	https://www.ncbi.nlm.nih.gov/pubmed/17885218 https://www.ncbi.nlm.nih.gov/pubmed/19036700 https://academic.oup.com/eurheartj/article/36/48/3437/2466062 https://www.researchgate.net/publication/40893702_Mechanisms_of_Cell_Protection_by_Heme_Oxygenase-1/figures?lo=1	Metabolism	1.2	Oxidative Stress	Ion Heme/Fe	Heme oxygenase-1 (HO-1) is an antioxidative, antiinflammatory, and cytoprotective enzyme that is induced in response to cellular stress	heme, inflammation, mitochondria
ENSMUSG00000051510	Mafg	ENSMUST00000058162.13,ENSMUST00000128498.1,ENSMUST00000106181.7,ENSMUST00000106180.1,ENSMUST00000106182.7	processed_transcript,protein_coding	-0.191796	6.50139	0.000205905	0.00775128	MAF BZIP Transcription Factor G	Globin gene expression is regulated through nuclear factor erythroid-2 (NFE2) elements located in enhancer-like locus control regions positioned many kb upstream of alpha- and beta-gene clusters (summarized by Blank et al., 1997 [PubMed 9166829]). NFE2 DNA-binding activity consists of a heterodimer containing a ubiquitous small Maf protein (MafF, MIM 604877; MafG; or MafK, MIM 600197) and the tis…	https://pubmed.ncbi.nlm.nih.gov/27058431/?from_term=Mafg+&from_pos=1 https://pubmed.ncbi.nlm.nih.gov/22965115/?from_term=Mafg&from_page=2&from_pos=2	Metabolism	1.2	Oxidative Stress		antioxidant		Transcription factor, linked to BACH and NRF2, ROS stress and metabolism linked
ENSMUSG00000025993	Slc40a1	ENSMUST00000187406.6,ENSMUST00000188252.6,ENSMUST00000027137.10,ENSMUST00000187420.6,ENSMUST00000186804.1,ENSMUST00000186822.1,ENSMUST00000191247.6,ENSMUST00000186755.1	processed_transcript,retained_intron,protein_coding	-0.188992	6.01396	0.0012521	0.0277511	Solute Carrier Family 40 Member 1	Iron export from epithelial cells		Metabolism	1.2	Oxidative Stress	Ion Heme/Fe	Iron efflux from the cell -	Iron export, do the less have low iron
ENSMUSG00000028843	Sh3bgrl3	ENSMUST00000136408.1,ENSMUST00000030651.8,ENSMUST00000105879.1	retained_intron,protein_coding	0.185106	8.4613	0.00130057	0.02844	SH3 domain-binding glutamic acid-rich-like protein 3	H3BGRL3 protein shows a significant similarity to glutaredoxin 1 of E. coli, and all the three proteins are predicted to belong to thioredoxin-like protein family. Glutaredoxins (GRXs) are ubiquitous oxidoreductases, which catalyze the reduction of many intra-cellular protein disulfides and play an important role in many redox pathways. However, the SH3BGRL3 protein lacks the enzymatic function o…		Metabolism	1.2	Oxidative Stress	glutathione		REDOX regulator
ENSMUSG00000028484	Psip1	ENSMUST00000107214.8,ENSMUST00000152382.1,ENSMUST00000107215.8,ENSMUST00000144349.1,ENSMUST00000126706.7,ENSMUST00000030207.14,ENSMUST00000130626.1	retained_intron,protein_coding	0.219759	5.50716	0.000160308	0.00651492	PC4 And SFRS1 Interacting Protein 1	Transcriptional coactivator involved in neuroepithelial stem cell differentiation and neurogenesis. Involved in particular in lens epithelial cell gene regulation and stress responses. May play an important role in lens epithelial to fiber cell terminal differentiation. May play a protective role during stress-induced apoptosis. Isoform 2 is a more general and stronger transcriptional coactivator…		Metabolism	1.2	Oxidative Stress			Transcription coactivator, Stress responses, cell; differentiation
ENSMUSG00000046949	Nqo2	ENSMUST00000058978.7,ENSMUST00000021843.11	protein_coding	0.224258	4.99569	0.00065884	0.0178395	N-Ribosyldihydronicotinamide:Quinone Reductase 2	This gene encodes a member of the thioredoxin family of enzymes. It is a cytosolic and ubiquitously expressed flavoprotein that catalyzes the two-electron reduction of quinone substrates and uses dihydronicotinamide riboside as a reducing coenzyme. Mutations in this gene have been associated with neurodegenerative diseases and several cancers. Alternative splicing results in multiple transcript v…		Metabolism	1.2	Oxidative Stress			vitamin K-dependent gamma-carboxylation of glutamate residues in prothrombin synthesis	Detoxification enzyme, thrombin synthesis
ENSMUSG00000003617	Cp	ENSMUST00000108325.8,ENSMUST00000131811.1,ENSMUST00000173848.1,ENSMUST00000108328.7,ENSMUST00000150264.7,ENSMUST00000108329.7,ENSMUST00000128615.7,ENSMUST00000174803.1,ENSMUST00000172860.1,ENSMUST00000129135.1,ENSMUST00000172605.1,ENSMUST00000091309.11,ENSMUST00000003714.12,ENSMUST00000173779.1,ENSMUST00000131454.1,ENSMUST00000125994.1	nonsense_mediated_decay,retained_intron,protein_coding	0.24116	8.78706	9.98087e-05	0.00467205	ceruloplasmin	Ceruloplasmin is an enzyme (EC 1.16.3.1) synthesized in the liver containing 6 atoms of copper in its structure.[9] Ceruloplasmin carries more than 95% of the total copper in healthy human plasma.[10] The rest is accounted for by macroglobulins. Ceruloplasmin exhibits a copper-dependent oxidase activity, which is associated with possible oxidation of Fe2+ (ferrous iron) into Fe3+ (ferric iron), t…	https://www.jbc.org/content/274/29/20265.full	Metabolism	1.2	Oxidative Stress	Ion Heme/Fe	Ceruloplasmin exhibits a copper-dependent oxidase activity, which is associated with possible oxidation of Fe2+ (ferrous iron) into Fe3+ (ferric iron), therefore assisting in its transport in the plasma in association with transferrin, which can carry iron only in the ferric state.	Iron metabolism, copper metabolism, blood flow
ENSMUSG00000032786	Alas1	ENSMUST00000134053.7,ENSMUST00000219340.1,ENSMUST00000143125.1,ENSMUST00000123601.1,ENSMUST00000141118.8,ENSMUST00000214249.1,ENSMUST00000133617.2,ENSMUST00000219129.1,ENSMUST00000074082.12,ENSMUST00000123115.1,ENSMUST00000112524.8,ENSMUST00000214989.1,ENSMUST00000215222.1	nonsense_mediated_decay,processed_transcript,retained_intron,protein_coding	0.247031	7.07395	0.00128079	0.0281649	Delta-aminolevulinate synthase 1	This gene encodes the mitochondrial enzyme which is catalyzes the rate-limiting step in heme (iron-protoporphyrin) biosynthesis. The enzyme encoded by this gene is the housekeeping enzyme; a separate gene encodes a form of the enzyme that is specific for erythroid tissue. The level of the mature encoded protein is regulated by heme: high levels of heme down-regulate the mature enzyme in mitochond…	https://www.nature.com/articles/s41418-017-0001-7 http://genesdev.cshlp.org/content/23/18/2201/F7.expansion.html	Metabolism	1.2	Oxidative Stress	Ion Heme/Fe	Result in high heme production , but lower heme oxgenase means less degradation. Higher heme would normally activate rev erba, so is there actually less heme? Heme also activates TLR4 and supresess angiogenesis	Heme, mitochondria
ENSMUSG00000021591	Glrx	ENSMUST00000022082.7	protein_coding	0.259265	5.17639	0.0021064	0.0394493	Glutaredoxin, Thioltransferase-1	This gene encodes a member of the glutaredoxin family. The encoded protein is a cytoplasmic enzyme catalyzing the reversible reduction of glutathione-protein mixed disulfides. This enzyme highly contributes to the antioxidant defense system. It is crucial for several signalling pathways by controlling the S-glutathionylation status of signalling mediators. It is involved in beta-amyloid toxicity …	https://www.sciencedirect.com/science/article/pii/S2213231716301422	Metabolism	1.2	Oxidative Stress	glutathione		In high fat diets there is lower rac1 and higher rhoA actitiy, leading to disruption of the cortical actin ring. Glrx reduces glutathione proteins e.g. rac1 and enbales RhoA inhibition	GSH, ROS, Rac, ROS
ENSMUSG00000040562	Gstm2	ENSMUST00000150808.1,ENSMUST00000066530.6,ENSMUST00000140420.7,ENSMUST00000012348.8	retained_intron,protein_coding	0.273543	6.59845	0.00234098	0.0426605	Glutathione S-Transferase Mu 2	Cytosolic and membrane-bound forms of glutathione S-transferase are encoded by two distinct supergene families. At present, eight distinct classes of the soluble cytoplasmic mammalian glutathione S-transferases have been identified: alpha, kappa, mu, omega, pi, sigma, theta and zeta. This gene encodes a glutathione S-transferase that belongs to the mu class. The mu class of enzymes functions in t…		Metabolism	1.2	Oxidative Stress	glutathione		ROS, glutatione
ENSMUSG00000015217	Hmgb3	ENSMUST00000114582.8,ENSMUST00000015361.10,ENSMUST00000132145.1,ENSMUST00000072699.12,ENSMUST00000123100.1,ENSMUST00000088874.9	retained_intron,protein_coding	0.288611	4.55925	0.00181027	0.0356877	High Mobility Group Box 3	Multifunctional protein with various roles in different cellular compartments. May act in a redox sensitive manner. Associates with chromatin and binds DNA with a preference to non-canonical DNA structures such as single-stranded DNA. Can bent DNA and enhance DNA flexibility by looping thus providing a mechanism to promote activities on various gene promoters (By similarity). Proposed to be invol…		Metabolism	1.2	Oxidative Stress
ENSMUSG00000028597	Gpx7	ENSMUST00000030332.6,ENSMUST00000184609.1	protein_coding	0.313285	5.01694	0.0010478	0.0244012	Glutathione Peroxidase 7	It protects esophageal epithelia from hydrogen peroxide-induced oxidative stress. It suppresses acidic bile acid-induced reactive oxigen species (ROS) and protects against oxidative DNA damage and double-strand breaks.		Metabolism	1.2	Oxidative Stress	glutathione		ROS, gluathione
ENSMUSG00000025289	Prdx4	ENSMUST00000026328.10,ENSMUST00000123915.1,ENSMUST00000130349.2	processed_transcript,protein_coding	0.397198	5.67235	5.23406e-06	0.000585225	Peroxiredoxin 4	The protein encoded by this gene is an antioxidant enzyme and belongs to the peroxiredoxin family. The protein is localized to the cytoplasm. Peroxidases of the peroxiredoxin family reduce hydrogen peroxide and alkyl hydroperoxides to water and alcohol with the use of reducing equivalents derived from thiol-containing donor molecules. This protein has been found to play a regulatory role in the a…		Metabolism	1.2	Oxidative Stress		antioxidant		ROS, antioxidant
ENSMUSG00000054717	Hmgb2	ENSMUST00000211198.1,ENSMUST00000210871.1,ENSMUST00000067925.7	processed_transcript,protein_coding	0.49504	6.08931	8.97893e-07	0.000177011	High Mobility Group Box 2	Multifunctional protein with various roles in different cellular compartments. May act in a redox sensitive manner. In the nucleus is an abundant chromatin-associated non-histone protein involved in transcription, chromatin remodeling and V(D)J recombination and probably other processes. Binds DNA with a preference to non-canonical DNA structures such as single-stranded DNA. Can bent DNA and enha…	https://pubmed.ncbi.nlm.nih.gov/19811285/	Metabolism	1.2	Oxidative Stress		Promtes endothelial cell proliferation via Rage	RAGE, wnt Beta catenin
ENSMUSG00000001665	Gstt3	ENSMUST00000218091.1,ENSMUST00000174649.1,ENSMUST00000174187.1,ENSMUST00000173537.1,ENSMUST00000001715.9,ENSMUST00000133869.1	nonsense_mediated_decay,processed_transcript,retained_intron,protein_coding	0.498785	1.89861	0.0013829	0.0297124	Glutathione S-Transferase Theta 2B	The protein encoded by this gene, glutathione S-transferase (GST) theta 2B (GSTT2B), is a member of a superfamily of proteins that catalyze the conjugation of reduced glutathione to a variety of electrophilic and hydrophobic compounds. Human GSTs can be divided into five main classes: alpha, mu, pi, theta, and zeta. The theta class includes GSTT1, GSTT2, and GSTT2B. GSTT2 and GSTT2B are nearly id…		Metabolism	1.2	Oxidative Stress	glutathione			conjugation of reduced glutathione
ENSMUSG00000026822	Lcn2	ENSMUST00000050785.13,ENSMUST00000136509.1,ENSMUST00000155830.1,ENSMUST00000147219.1,ENSMUST00000144569.1,ENSMUST00000192241.1	processed_transcript,retained_intron,protein_coding	0.544701	8.91442	3.87765e-08	2.78441e-05	Lipocalin 2	Iron-trafficking protein involved in multiple processes such as apoptosis, innate immunity and renal development (PubMed:12453413, PubMed:27780864, PubMed:20581821). Binds iron through association with 2,5-dihydroxybenzoic acid (2,5-DHBA), a siderophore that shares structural similarities with bacterial enterobactin, and delivers or removes iron from the cell, depending on the context. Iron-bound…		Metabolism	1.2	Oxidative Stress	Ion Heme/Fe	Limits bacteria growth by requestering iron-containing siderophores	Iron trafficking, immune defense
ENSMUSG00000047443	Erfe	ENSMUST00000190998.1,ENSMUST00000086861.11	protein_coding	0.74108	1.05772	8.1496e-05	0.00403423	erythroferrone	Iron-regulatory hormone that acts as an erythroid regulator after hemorrhage: produced by erythroblasts following blood loss and mediates suppression of hepcidin (HAMP) expression in the liver, thereby promoting increased iron absorption and mobilization from stores. Promotes lipid uptake into adipocytes and hepatocytes via transcriptional up-regulation of genes involved in fatty acid uptake. ERF…	https://www.ncbi.nlm.nih.gov/pmc/articles/PMC6745900/	Metabolism	1.2	Oxidative Stress	Ion Heme/Fe	Iron homeostasis. If cells are depleted with iron - signal to get more from liver?	Iron metabolism, promote iron uptake by suppressing hepcidin
ENSMUSG00000074063	Osgin1	ENSMUST00000152420.7,ENSMUST00000145604.7,ENSMUST00000098365.3,ENSMUST00000126414.7,ENSMUST00000144381.1,ENSMUST00000212112.1,ENSMUST00000131448.7	processed_transcript,retained_intron,protein_coding	-0.435389	4.091	5.40738e-07	0.000137677	Oxidative Stress Induced Growth Inhibitor 1	This gene encodes an oxidative stress response protein that regulates cell death. Expression of the gene is regulated by p53 and is induced by DNA damage. The protein regulates apoptosis by inducing cytochrome c release from mitochondria. It also appears to be a key regulator of both inflammatory and anti-inflammatory molecules. The loss of this protein correlates with uncontrolled cell growth an…		Metabolism	1.3	Mitochondrial	Mitochondria Cytochrome C		ROS, mitochondria cytocrome C release, inflammation
ENSMUSG00000057229	Atp5sl	ENSMUST00000077338.11,ENSMUST00000205593.1,ENSMUST00000126925.7,ENSMUST00000085953.4,ENSMUST00000130897.1,ENSMUST00000147472.1	nonsense_mediated_decay,processed_transcript,retained_intron,protein_coding	-0.227647	4.42088	0.000993761	0.0237079	Distal Membrane Arm Assembly Complex 2/ DMAC2	Required for the assembly of the mitochondrial NADH:ubiquinone oxidoreductase complex (complex I). Involved in the assembly of the distal region of complex I.		Metabolism	1.3	Mitochondrial	Mitochondria Complex 1		Mitchondria, complex I
ENSMUSG00000022450	Ndufa6	ENSMUST00000023085.5	protein_coding	-0.223993	5.34493	5.58804e-05	0.00307055	NADH:Ubiquinone Oxidoreductase Subunit A6	Accessory subunit of the mitochondrial membrane respiratory chain NADH dehydrogenase (Complex I), that is believed to be not involved in catalysis. Required for proper complex I assembly (PubMed:30245030). Complex I functions in the transfer of electrons from NADH to the respiratory chain. The immediate electron acceptor for the enzyme is believed to be ubiquinone.	https://pubmed.ncbi.nlm.nih.gov/25613946/?from_term=Ndufa6+&from_pos=2	Metabolism	1.3	Mitochondrial	Mitochondria Complex 1		Mitochondria complex I assembly
ENSMUSG00000057789	Bak1	ENSMUST00000133448.1,ENSMUST00000143158.1,ENSMUST00000025034.11,ENSMUST00000078691.11	nonsense_mediated_decay,processed_transcript,protein_coding	0.196384	7.0843	0.00181591	0.0357676	BCL2 Antagonist/Killer 1	The protein encoded by this gene belongs to the BCL2 protein family. BCL2 family members form oligomers or heterodimers and act as anti- or pro-apoptotic regulators that are involved in a wide variety of cellular activities. This protein localizes to mitochondria, and functions to induce apoptosis. It interacts with and accelerates the opening of the mitochondrial voltage-dependent anion channel,…		Metabolism	1.3	Mitochondrial	Mitochondria Cytochrome C	Part of the p53 apoptotic response	Mitochondria, loss of membrane potential, cytochrome C
ENSMUSG00000064341	mt-Nd1	ENSMUST00000082392.1	protein_coding	0.197697	9.45271	7.22678e-05	0.00365799	Mitochondrial- NADH-ubiquinone oxidoreductase chain 1	MT-ND1-encoded NADH-ubiquinone oxidoreductase chain 1 is a subunit of the respiratory chain Complex I that is supposed to belong to the minimal assembly of core proteins required to catalyze NADH dehydrogenation and electron transfer to ubiquinone (coenzyme Q10).	https://www.ncbi.nlm.nih.gov/pmc/articles/PMC4310776/	Metabolism	1.3	Mitochondrial	Mitochondria Complex 1	Mitochondrial activation higher?: https://www.ncbi.nlm.nih.gov/pmc/articles/PMC4018556/
ENSMUSG00000064370	mt-Cytb	ENSMUST00000082421.1	protein_coding	0.204616	10.3155	0.00201175	0.0382181	Mitochondrially Encoded Cytochrome B	Complex 3 of the mitochondrial chain. mplex III is responsible for the catalysis of electron transfer from coenzyme Q to cytochrome c in the mitochondrial respiratory chain by translocating protons concomitantly across the inner membrane of the mitochondria.[12][9] The transfer of electrons then contributes to the generation of a proton gradient across the mitochondrial membrane that is then used…	https://www.ncbi.nlm.nih.gov/pubmed/7628554	Metabolism	1.3	Mitochondrial	Mitochondria Complex 3		Mitochondria, Complex 3
ENSMUSG00000064351	mt-Co1	ENSMUST00000082402.1	protein_coding	0.209736	11.9771	3.4205e-05	0.00212644	Mitochondrially Encoded Cytochrome C Oxidase I/COX1	Catalyses reduction of oxygen to water. Subunits 1-3 form the functional core of the enzyme complex. CO I is the catalytic subunit of the enzyme. Electrons originating in cytochrome c are transferred via the copper A center of subunit 2 and heme A of subunit 1 to the bimetallic center formed by heme A3 and copper B.		Metabolism	1.3	Mitochondrial	Mitochondria Cytochrome C		Mitcohondria, Oxygen to water, cytochrome C
ENSMUSG00000064363	mt-Nd4	ENSMUST00000082414.1	protein_coding	0.216572	9.54657	3.04593e-05	0.00198418	Mitochondrially Encoded NADH:Ubiquinone Oxidoreductase Core Subunit 4	MT-ND4 is a subunit of the respiratory chain Complex I that is believed to belong to the minimal assembly of core proteins required to catalyze NADH dehydrogenation and electron transfer to ubiquinone (coenzyme Q10).[14] Initially, NADH binds to Complex I and transfers two		Metabolism	1.3	Mitochondrial	Mitochondria Complex 1		Mitcohondria, Complex 1
ENSMUSG00000064367	mt-Nd5	ENSMUST00000082418.1	protein_coding	0.296742	10.7268	5.75479e-07	0.00014058	NADH dehydrogenase 5	Core subunit of the mitochondrial membrane respiratory chain NADH dehydrogenase (Complex I) that is believed to belong to the minimal assembly required for catalysis. Complex I functions in the transfer of electrons from NADH to the respiratory chain. The immediate electron acceptor for the enzyme is believed to be ubiquinone (By similarity).	http://downloads.hindawi.com/journals/omcl/2019/7976382.pdf	Metabolism	1.3	Mitochondrial	Mitochondria Complex 1		Mitochondria, NADH dehydrogenase, Complex1
ENSMUSG00000014633	Cmc2	ENSMUST00000131616.7,ENSMUST00000148235.7,ENSMUST00000150128.7,ENSMUST00000128304.1,ENSMUST00000134356.1,ENSMUST00000078589.6,ENSMUST00000155260.1	nonsense_mediated_decay,processed_transcript,retained_intron,protein_coding	0.346126	3.41207	0.000559529	0.0158279	C-X9-C Motif Containing 2 , COX Assembly Mitochondrial Protein 2 Homolog	May be involved in cytochrome c oxidase biogenesis	https://pubmed.ncbi.nlm.nih.gov/20220131/	Metabolism	1.3	Mitochondrial	Mitochondria Cytochome C		Mitochondria, cytochrome C
ENSMUSG00000064345	mt-Nd2	ENSMUST00000082396.1	protein_coding	0.357198	8.72223	1.9393e-07	7.51447e-05	Mitochondrially Encoded NADH:Ubiquinone Oxidoreductase Core Subunit 2; NADH dehydrogenase 2	Core subunit of the mitochondrial membrane respiratory chain NADH dehydrogenase (Complex I) that is believed to belong to the minimal assembly required for catalysis. Complex I functions in the transfer of electrons from NADH to the respiratory chain. The immediate electron acceptor for the enzyme is believed to be ubiquinone (By similarity).	https://www.hindawi.com/journals/omcl/2019/7976382/	Metabolism	1.3	Mitochondrial	Mitochondria Complex 1	Mitochondria complex 1	Mitochondria, complex 1
ENSMUSG00000023072	Cep89	ENSMUST00000206854.1,ENSMUST00000141704.7,ENSMUST00000129064.2,ENSMUST00000079414.11,ENSMUST00000140418.2,ENSMUST00000148166.2,ENSMUST00000155137.7,ENSMUST00000152020.2,ENSMUST00000125041.7,ENSMUST00000206230.1,ENSMUST00000150421.1	nonsense_mediated_decay,processed_transcript,retained_intron,protein_coding	0.377745	4.34694	1.76234e-05	0.00137848	Centrosomal Protein 89	Required for ciliogenesis. Also plays a role in mitochondrial metabolism where it may modulate complex IV activity.	https://pubmed.ncbi.nlm.nih.gov/23575228/	Metabolism	1.3	Mitochondrial	Complex 4	cilia - read into more	cilia, Mitochondira complex IV activity,
ENSMUSG00000064215	Ifi27	ENSMUST00000148824.1,ENSMUST00000066701.12,ENSMUST00000079294.11,ENSMUST00000153670.1,ENSMUST00000122905.7,ENSMUST00000085065.11,ENSMUST00000076788.11,ENSMUST00000076702.11,ENSMUST00000140838.1	retained_intron,protein_coding	0.392126	5.27301	1.20649e-05	0.00106332	Interferon Alpha Inducible Protein 27,Interferon Alpha-Inducible Protein 27, Mitochondrial	Probable adapter protein involved in different biological processes (PubMed:22427340, PubMed:27194766). Part of the signaling pathways that lead to apoptosis (PubMed:18330707, PubMed:27673746, PubMed:24970806). Involved in type-I interferon-induced apoptosis characterized by a rapid and robust release of cytochrome C from the mitochondria and activation of BAX and caspases 2, 3, 6, 8 and 9 (PubMe…		Metabolism	1.3	Mitochondrial	Mitochondria Cytochrome C		Type I interefrom cell death, cytochrome C release, mitochondria, innate immunity
ENSMUSG00000039096	Rsad1	ENSMUST00000132274.7,ENSMUST00000148888.1,ENSMUST00000143299.1,ENSMUST00000040487.3	processed_transcript,protein_coding	-0.439552	2.13904	0.00123588	0.0274188	Radical S-Adenosyl Methionine Domain Containing 1	May be a heme chaperone, appears to bind heme. Homologous bacterial proteins do not have oxygen-independent coproporphyrinogen-III oxidase activity (Probable). Binds 1 [4Fe-4S] cluster. The cluster is coordinated with 3 cysteines and an exchangeable S-adenosyl-L-methionine (By similarity).	https://digitalcommons.library.tmc.edu/dissertations/AAI3328246/ https://www.annualreviews.org/doi/pdf/10.1146/annurev-biochem-060713-035504	Metabolism	1.3	Mitochondrial			Mitochondria protein, maybe heme
ENSMUSG00000004561	Mettl17	ENSMUST00000163603.7,ENSMUST00000047899.12,ENSMUST00000166408.7,ENSMUST00000169019.7,ENSMUST00000168409.1,ENSMUST00000167984.1,ENSMUST00000165100.7,ENSMUST00000077846.6,ENSMUST00000168413.7,ENSMUST00000164902.7,ENSMUST00000164252.7,ENSMUST00000168217.7,ENSMUST00000164801.7,ENSMUST00000170887.7,ENSMUST00000165568.2,ENSMUST00000165150.1	nonsense_mediated_decay,retained_intron,protein_coding	-0.357298	3.55452	0.000835164	0.0211561	Methyltransferase Like 17	May be a component of the mitochondrial small ribosomal subunit.	https://pubmed.ncbi.nlm.nih.gov/31487196/?from_term=Mettl17&from_sort=pubdate&from_pos=1	Metabolism	1.3	Mitochondrial	Protein synthesis		Mitochondrial gene expression
ENSMUSG00000051557	Pusl1	ENSMUST00000097737.4,ENSMUST00000130146.1,ENSMUST00000142566.1,ENSMUST00000129637.7,ENSMUST00000123504.1,ENSMUST00000150446.7,ENSMUST00000142724.7	processed_transcript,retained_intron,protein_coding	-0.328569	4.3213	0.000259948	0.00915684	Pseudouridine Synthase Like	PUSL1 (Pseudouridine Synthase Like 1) is a Protein Coding gene. Diseases associated with PUSL1 include Myopathy, Lactic Acidosis, And Sideroblastic Anemia. Gene Ontology (GO) annotations related to this gene include RNA binding and pseudouridine synthase activity. An important paralog of this gene is PUS3.	https://pubmed.ncbi.nlm.nih.gov/31693908/?from_single_result=Pusl1	Metabolism	1.3	Mitochondrial	Protein levels	inner-membrane-associated mitochondrial matrix protein required for efficient mitochondrial translation.	Mitochondria gene translation
ENSMUSG00000035202	Lars2	ENSMUST00000216843.1,ENSMUST00000213711.1,ENSMUST00000217116.1,ENSMUST00000214557.1,ENSMUST00000214074.1,ENSMUST00000038863.8,ENSMUST00000215087.1,ENSMUST00000215674.1,ENSMUST00000215464.1	nonsense_mediated_decay,retained_intron,protein_coding	-0.317785	5.59958	0.000835925	0.0211561	Leucyl-TRNA Synthetase 2, Mitochondrial	This gene encodes a class 1 aminoacyl-tRNA synthetase, mitochondrial leucyl-tRNA synthetase. Each of the twenty aminoacyl-tRNA synthetases catalyzes the aminoacylation of a specific tRNA or tRNA isoaccepting family with the cognate amino acid. [provided by RefSeq, Jul 2008] LARS2 (Leucyl-TRNA Synthetase 2, Mitochondrial) is a Protein Coding gene. Diseases associated with LARS2 include Hydrops, La…	https://pubmed.ncbi.nlm.nih.gov/32399598/?from_term=Lars2&from_sort=pubdate&from_pos=3	Metabolism	1.3	Mitochondrial	Protein synthesis		Mitochondrial mainenance and translation
ENSMUSG00000023912	Slc25a27	ENSMUST00000024705.4	protein_coding	-0.314421	3.42094	0.000907617	0.0223415	Solute Carrier Family 25 Member 27,Mitochondrial, Uncoupling Protein 4	Mitochondrial uncoupling proteins (UCP) are members of the larger family of mitochondrial anion carrier proteins (MACP). UCPs separate oxidative phosphorylation from ATP synthesis with energy dissipated as heat, also referred to as the mitochondrial proton leak. UCPs facilitate the transfer of anions from the inner to the outer mitochondrial membrane and the return transfer of protons from the ou…	https://pubmed.ncbi.nlm.nih.gov/26923023/ https://pubmed.ncbi.nlm.nih.gov/25237189/?from_term=Slc25a27&from_sort=pubdate&from_pos=9	Metabolism	1.3	Mitochondrial	Uncoupling	linked to APOE4 and AD risk, overexpression = more lactate so less amount = ? for metabolism	Uncoupling, acidicification, mitochondrial metabolism
ENSMUSG00000003546	Klc4	ENSMUST00000003642.6	protein_coding	-0.308398	4.22707	0.00015507	0.00639456	Kinesin Light Chain 4	Kinesin is a microtubule-associated force-producing protein that may play a role in organelle transport. The light chain may function in coupling of cargo to the heavy chain or in the modulation of its ATPase activity (By similarity).	https://pubmed.ncbi.nlm.nih.gov/29717133/?from_term=Klc4+&from_pos=2	Metabolism	1.3	Mitochondrial		KLC4-knockdown cells exhibited impaired mitochondrial respiration, increased mitochondrial reactive oxygen species production, and enhanced mitochondrial calcium uptake, resulting in mitochondrial dysfunction. Also associated with Hereditary Spastic Paraplegia	Mitochondrial respiration, ROS levels
ENSMUSG00000023938	Aars2	ENSMUST00000024733.7	protein_coding	-0.296446	4.19584	5.62208e-05	0.00307423	mitochondrial alanyl-tRNA synthetase	The protein encoded by this gene belongs to the class-II aminoacyl-tRNA synthetase family. Aminoacyl-tRNA synthetases play critical roles in mRNA translation by charging tRNAs with their cognate amino acids. The encoded protein is a mitochondrial enzyme that specifically aminoacylates alanyl-tRNA. Mutations in this gene are a cause of combined oxidative phosphorylation deficiency 8. [provided by …	https://jneurodevdisorders.biomedcentral.com/articles/10.1186/s11689-019-9292-y	Metabolism	1.3	Mitochondrial	Protein levels	mitochondria, loss of this results in lower complex IV activity	Mitcohondria
ENSMUSG00000033685	Ucp2	ENSMUST00000149808.1,ENSMUST00000126381.2,ENSMUST00000153287.7,ENSMUST00000207890.1,ENSMUST00000133498.1,ENSMUST00000126534.7,ENSMUST00000151221.7,ENSMUST00000133044.2,ENSMUST00000138673.1,ENSMUST00000207748.1,ENSMUST00000129324.7	processed_transcript,retained_intron,protein_coding	-0.288799	9.2956	0.00019973	0.00758232	Uncoupling Protein 2	Mitochondrial uncoupling proteins (UCP) are members of the larger family of mitochondrial anion carrier proteins (MACP). UCPs separate oxidative phosphorylation from ATP synthesis with energy dissipated as heat, also referred to as the mitochondrial proton leak. UCPs facilitate the transfer of anions from the inner to the outer mitochondrial membrane and the return transfer of protons from the ou…	https://www.ncbi.nlm.nih.gov/pubmed/23819990	Metabolism	1.3	Mitochondrial	Uncoupling	Implies less uncoupled mitocondria, so less ROS/	Mitochondria, uncoupling, senescence
ENSMUSG00000047084	Ngrn	ENSMUST00000138005.1,ENSMUST00000117989.1	retained_intron,protein_coding	-0.287724	3.49278	0.000515833	0.0149778	Neugrin, Neurite Outgrowth Associated	Plays an essential role in mitochondrial ribosome biogenesis. As a component of a functional protein-RNA module, consisting of RCC1L, NGRN, RPUSD3, RPUSD4, TRUB2, FASTKD2 and 16S mitochondrial ribosomal RNA (16S mt-rRNA), controls 16S mt-rRNA abundance and is required for intra-mitochondrial translation of core subunits of the oxidative phosphorylation system	https://pubmed.ncbi.nlm.nih.gov/27667664/	Metabolism	1.3	Mitochondrial	Protein synthesis		Mitochondria ribosome biosynthesis
ENSMUSG00000020359	Phykpl	ENSMUST00000164864.1,ENSMUST00000169995.1,ENSMUST00000169823.1,ENSMUST00000167797.7,ENSMUST00000109105.2,ENSMUST00000020625.6,ENSMUST00000156128.7,ENSMUST00000101250.11	nonsense_mediated_decay,retained_intron,protein_coding	-0.2638	3.47695	0.00288574	0.0489565	5-Phosphohydroxy-L-Lysine Phospho-Lyase	This is a nuclear gene encoding a mitochondrial enzyme that catalyzes the conversion of 5-phosphonooxy-L-lysine to ammonia, inorganic phosphate, and 2-aminoadipate semialdehyde. Mutations in this gene may cause phosphohydroxylysinuria. Alternative splicing results in multiple transcript variants. [provided by RefSeq, May 2013]		Metabolism	1.3	Mitochondrial			Mitochondrial enzyme,
ENSMUSG00000035824	Tk2	ENSMUST00000050211.6,ENSMUST00000212209.1,ENSMUST00000212165.1,ENSMUST00000212279.1,ENSMUST00000211995.1,ENSMUST00000212854.1,ENSMUST00000212275.1,ENSMUST00000212805.1	nonsense_mediated_decay,processed_transcript,retained_intron,protein_coding	-0.23158	3.83357	0.0018856	0.0367537	Thymidine Kinase 2, Thymidine Kinase 2, Mitochondrial	This gene encodes a deoxyribonucleoside kinase that specifically phosphorylates thymidine, deoxycytidine, and deoxyuridine. The encoded enzyme localizes to the mitochondria and is required for mitochondrial DNA synthesis. Mutations in this gene are associated with a myopathic form of mitochondrial DNA depletion syndrome. Alternate splicing results in multiple transcript variants encoding distinct…		Metabolism	1.3	Mitochondrial	Fission	Mutations in this gene are associated with a myopathic form of mitochondrial DNA depletion syndrome. Alternate splicing results in multiple transcript variants encoding distinct isoforms, some of which lack transit peptide, so are not localized to mitochondria.	Mitochondria DNA synthesis,
ENSMUSG00000028756	Pink1	ENSMUST00000030536.12,ENSMUST00000105816.7,ENSMUST00000105817.3	protein_coding	-0.207988	7.40493	0.00166542	0.0337804	PTEN Induced Kinase 1	Protects against mitochondrial dysfunction during cellular stress by phosphorylating mitochondrial proteins. Involved in the clearance of damaged mitochondria via selective autophagy (mitophagy) by mediating activation and translocation of PRKN (PubMed:14607334, PubMed:15087508, PubMed:19229105, PubMed:19966284, PubMed:20404107, PubMed:20798600, PubMed:23620051, PubMed:23754282, PubMed:23933751, …	https://pubmed.ncbi.nlm.nih.gov/27251035/	Metabolism	1.3	Mitochondrial	Fission	https://pubmed.ncbi.nlm.nih.gov/29077793/ Strong AD link	Mitophagy, complex 1 activity, general mitochondrial function, clearance of damaged mitochondria
ENSMUSG00000038967	Pdk2	ENSMUST00000129262.1,ENSMUST00000038431.7,ENSMUST00000126730.1,ENSMUST00000155857.1,ENSMUST00000141712.7	processed_transcript,protein_coding	-0.205847	5.27689	0.00184306	0.0362387	Pyruvate Dehydrogenase Kinase 2	This gene encodes a member of the pyruvate dehydrogenase kinase family. The encoded protein phosphorylates pyruvate dehydrogenase, down-regulating the activity of the mitochondrial pyruvate dehydrogenase complex. Overexpression of this gene may play a role in both cancer and diabetes. Alternatively spliced transcript variants encoding multiple isoforms have been observed for this gene. [provided …	https://cyberleninka.org/article/n/142675 https://pubmed.ncbi.nlm.nih.gov/17669420/	Metabolism	1.3	Mitochondrial		Inhibition of pyruvate dehydrogenase decreases glucose utilization and increases fat metabolism	inhibits pyruvate dehydrogenase activity, decreases glucose and increase fattay acid metabolism, mitophagy, direct target of PPAR
ENSMUSG00000020329	Polrmt	ENSMUST00000160838.7,ENSMUST00000162679.1,ENSMUST00000162694.7,ENSMUST00000161375.1,ENSMUST00000159016.7,ENSMUST00000162687.1,ENSMUST00000161098.7,ENSMUST00000159289.1,ENSMUST00000159082.7,ENSMUST00000161765.7,ENSMUST00000161662.7,ENSMUST00000160595.7,ENSMUST00000020580.12	nonsense_mediated_decay,processed_transcript,retained_intron,protein_coding	-0.186052	4.88121	0.00235806	0.042738	RNA Polymerase Mitochondrial	DNA-dependent RNA polymerase catalyzes the transcription of mitochondrial DNA into RNA using the four ribonucleoside triphosphates as substrates (PubMed:21278163). Component of the mitochondrial transcription initiation complex, composed at least of TFB2M, TFAM and POLRMT that is required for basal transcription of mitochondrial DNA (PubMed:29149603). In this complex, TFAM recruits POLRMT to a sp…		Metabolism	1.3	Mitochondrial	Protein levels		Mitochondrial transcription
ENSMUSG00000046671	Mtfr1l	ENSMUST00000130187.7,ENSMUST00000116279.9,ENSMUST00000129836.1,ENSMUST00000146808.1,ENSMUST00000102550.9,ENSMUST00000154769.7,ENSMUST00000131613.7	nonsense_mediated_decay,retained_intron,protein_coding	-0.183332	5.63837	0.000495523	0.0145194	Mitochondrial Fission Regulator 1 Like	MTFR1L (Mitochondrial Fission Regulator 1 Like) is a Protein Coding gene. An important paralog of this gene is MTFR2.		Metabolism	1.3	Mitochondrial	Fission		Mitochondrial fission
ENSMUSG00000002949	Timm44	ENSMUST00000160549.1,ENSMUST00000147831.1,ENSMUST00000141195.1,ENSMUST00000148672.1,ENSMUST00000161143.7,ENSMUST00000160371.8,ENSMUST00000135755.1,ENSMUST00000149827.7,ENSMUST00000003029.13	processed_transcript,retained_intron,protein_coding	-0.163513	5.38078	0.00188316	0.036738	Translocase Of Inner Mitochondrial Membrane 44	This gene encodes a peripheral membrane protein associated with the mitochondrial inner membrane translocase, which functions in the import of proteins across the mitochondrial inner membrane and into the mitochondrial matrix. The encoded protein mediates binding of mitochondrial heat shock protein 70 to the translocase of inner mitochondrial membrane 23 (TIM23) complex. Expression of this gene i…	https://pubmed.ncbi.nlm.nih.gov/27849558/	Metabolism	1.3	Mitochondrial	Protein levels		Mitochondrial protein import, HSP70, autophagy, ROS
ENSMUSG00000031633	Slc25a4	ENSMUST00000034049.4,ENSMUST00000155986.1	retained_intron,protein_coding	0.171662	7.19807	0.00133527	0.0289103	Solute Carrier Family 25 Member 4	This gene is a member of the mitochondrial carrier subfamily of solute carrier protein genes. The product of this gene functions as a gated pore that translocates ADP from the cytoplasm into the mitochondrial matrix and ATP from the mitochondrial matrix into the cytoplasm. The protein forms a homodimer embedded in the inner mitochondria membrane. Mutations in this gene have been shown to result i…	https://pubmed.ncbi.nlm.nih.gov/23506884/	Metabolism	1.3	Mitochondrial	ADP/ATP		Mitochondria, ATP export to the cytoplasm, ADP import to mitochondria
ENSMUSG00000026775	Yme1l1	ENSMUST00000149240.1,ENSMUST00000125004.7,ENSMUST00000134342.1,ENSMUST00000147750.1,ENSMUST00000028117.3,ENSMUST00000148616.1	processed_transcript,protein_coding	0.17469	5.53041	0.00187052	0.0365866	YME1 Like 1 ATPase	ATP-dependent metalloprotease that catalyzes the degradation of folded and unfolded proteins with a suitable degron sequence in the mitochondrial intermembrane region (PubMed:26923599, PubMed:27786171). Plays an important role in regulating mitochondrial morphology and function by cleaving OPA1 at position S2, giving rise to a form of OPA1 that promotes maintenance of normal mitochondrial structu…	https://pubmed.ncbi.nlm.nih.gov/26923599/ https://www.nature.com/articles/s41586-019-1738-6.pdf	Metabolism	1.3	Mitochondrial	Protein levels	YME1L degrades mitochondrial protein translocases, lipid transfer proteins and metabolic enzymes to acutely limit mitochondrial biogenesis. mTOR	Degradation of mitochondrial proteins, modualtion of mitochondria biogenesis, mitochondrial membrane depolarization
ENSMUSG00000023942	Slc29a1	ENSMUST00000164217.7,ENSMUST00000064889.12,ENSMUST00000172301.7,ENSMUST00000171081.7,ENSMUST00000167332.7,ENSMUST00000169729.7,ENSMUST00000164618.7,ENSMUST00000166119.7,ENSMUST00000171876.7,ENSMUST00000167195.7,ENSMUST00000167748.1,ENSMUST00000167692.7,ENSMUST00000170488.7,ENSMUST00000163905.7,ENSMUST00000163492.7,ENSMUST00000166633.7,ENSMUST00000168274.1,ENSMUST00000097317.9,ENSMUST00000171847.7…	processed_transcript,retained_intron,protein_coding	0.19157	6.4328	0.00140782	0.02999	Solute Carrier Family 29 Member 1 (Augustine Blood Group)	This gene is a member of the equilibrative nucleoside transporter family. The gene encodes a transmembrane glycoprotein that localizes to the plasma and mitochondrial membranes and mediates the cellular uptake of nucleosides from the surrounding medium. The protein is categorized as an equilibrative (as opposed to concentrative) transporter that is sensitive to inhibition by nitrobenzylthioinosin…		Metabolism	1.3	Mitochondrial	Nucleoside transport	NO downregulates its expression, transport nucleoside substrates like adenosine into cells	NO, nucleoside transport into teh cell
ENSMUSG00000040322	Slc25a24	ENSMUST00000029477.10,ENSMUST00000140786.2	nonsense_mediated_decay,protein_coding	0.241247	5.10714	0.00070206	0.0187611	Solute Carrier Family 25 Member 24; Calcium-binding mitochondrial carrier protein SCaMC-1	calcium-regulated carrier protein that transports ATP-Mg exchanging it for phosphate; SCaMC-1 promotes cancer cell survival by desensitizing mitochondrial permeability transition via ATP/ADP-mediated matrix Ca2+ buffering.Calcium-dependent mitochondrial solute carrier. Mediates the reversible, electroneutral exchange of Mg-ATP or Mg-ADP against phosphate ions, catalyzing the net uptake or efflux …	https://www.nature.com/articles/srep45383	Metabolism	1.3	Mitochondrial	ADP/ATP		Mitochondria, calcium
ENSMUSG00000030335	Mrpl51	ENSMUST00000144380.1,ENSMUST00000032485.6,ENSMUST00000136804.1	processed_transcript,retained_intron,protein_coding	0.247654	5.16448	0.00116923	0.026285	Mitochondrial Ribosomal Protein L51	Mammalian mitochondrial ribosomal proteins are encoded by nuclear genes and help in protein synthesis within the mitochondrion. Mitochondrial ribosomes (mitoribosomes) consist of a small 28S subunit and a large 39S subunit. They have an estimated 75% protein to rRNA composition compared to prokaryotic ribosomes, where this ratio is reversed. Another difference between mammalian mitoribosomes and …		Metabolism	1.3	Mitochondrial	Protein levels		Mitochiondria ribisome, mitochondrial translation
ENSMUSG00000045948	Mrps12	ENSMUST00000165246.1,ENSMUST00000171183.1,ENSMUST00000165004.1,ENSMUST00000056078.8	processed_transcript,protein_coding	0.267619	4.18676	0.000872324	0.0216865	Mitochondrial Ribosomal Protein S12	Mammalian mitochondrial ribosomal proteins are encoded by nuclear genes and help in protein synthesis within the mitochondrion. Mitochondrial ribosomes (mitoribosomes) consist of a small 28S subunit and a large 39S subunit. They have an estimated 75% protein to rRNA composition compared to prokaryotic ribosomes, where this ratio is reversed. Another difference between mammalian mitoribosomes and …		Metabolism	1.3	Mitochondrial	Protein levels		Mitochondria ribosomal system
ENSMUSG00000064254	Ethe1	ENSMUST00000077191.6	protein_coding	0.278446	5.45628	0.000732063	0.019418	ETHE1 Persulfide Dioxygenase	This gene encodes a member of the metallo beta-lactamase family of iron-containing proteins involved in the mitochondrial sulfide oxidation pathway. The encoded protein catalyzes the oxidation of a persulfide substrate to sulfite. Certain mutations in this gene cause ethylmalonic encephalopathy, an infantile metabolic disorder affecting the brain, gastrointestinal tract and peripheral vessels. Al…	https://pubmed.ncbi.nlm.nih.gov/31258845/?from_term=Ethe1&from_sort=pubdate&from_pos=6 https://pubmed.ncbi.nlm.nih.gov/31258845/	Metabolism	1.3	Mitochondrial	suplhatide clearance		sulpher metabolism, ROS, glutathione, mitochondria
ENSMUSG00000007646	Rad51c	ENSMUST00000129400.1,ENSMUST00000153073.7,ENSMUST00000007790.10,ENSMUST00000067692.12	nonsense_mediated_decay,protein_coding	0.461458	2.12209	0.00247595	0.0441624	RAD51 Paralog C	Essential for the homologous recombination (HR) pathway of DNA repair. Involved in the homologous recombination repair (HRR) pathway of double-stranded DNA breaks arising during DNA replication or induced by DNA-damaging agents. Part of the RAD21 paralog protein complexes BCDX2 and CX3 which act at different stages of the BRCA1-BRCA2-dependent HR pathway. Upon DNA damage, BCDX2 seems to act downs…	https://mcb.asm.org/content/38/3/e00489-17	Metabolism	1.3	Mitochondrial	Fission		DNA repair, mitochondrial number, RAD51
ENSMUSG00000075010	AW112010	ENSMUST00000099676.4	lincRNA	0.483135	4.46422	7.42363e-07	0.000162146	Small secreted protein interferon-induced	Non coding RNA. Something to do with mitcohondria and protective	https://www.hindawi.com/journals/omcl/2019/6150148/	Metabolism	1.3	Mitochondrial		Higher mitochondria number?	Mitcohondria
ENSMUSG00000019992	Mtfr2	ENSMUST00000217608.1,ENSMUST00000213374.1,ENSMUST00000169712.2	processed_transcript,protein_coding	0.589463	2.31259	0.00011207	0.0050982	Mitochondrial Fission Regulator 2	May play a role in mitochondrial aerobic respiration MTFR2 maintains cellular aerobic glycolysis.	https://www.aging-us.com/article/102442/text	Metabolism	1.3	Mitochondrial	Fission	Mitochondria are multifaceted organelles that are at the centre stage of energetics/metabolism, but mitochondria can also take part in cellular redox balance, calcium balance, lipid modification, and cell deatH MTFR2 maintains cellular aerobic glycolysis.	Mitochondrial fission
ENSMUSG00000076437	Selenoh	ENSMUST00000189636.6,ENSMUST00000154179.1,ENSMUST00000117299.8,ENSMUST00000189988.1,ENSMUST00000102646.2,ENSMUST00000102647.9	retained_intron,protein_coding	0.604714	5.12995	2.52219e-06	0.00036855	Selenoprotein H	This gene encodes a nucleolar protein, which belongs to the SelWTH family. It functions as an oxidoreductase, and has been shown to protect neurons against UVB-induced damage by inhibiting apoptotic cell death pathways, promote mitochondrial biogenesis and mitochondrial function, and suppress cellular senescence through genome maintenance and redox regulation. This protein is a selenoprotein, con…		Metabolism	1.3	Mitochondrial			Protection from UV damage, mitochondria biosynthesis	?
ENSMUSG00000032254	Kif23	ENSMUST00000214295.1,ENSMUST00000216746.1,ENSMUST00000215743.1,ENSMUST00000213595.1,ENSMUST00000215404.1,ENSMUST00000215965.1,ENSMUST00000213159.1,ENSMUST00000216717.1,ENSMUST00000216812.1,ENSMUST00000034815.8,ENSMUST00000215319.1,ENSMUST00000214940.1	processed_transcript,retained_intron,protein_coding	0.550461	6.33247	1.08371e-06	0.000199951	Kinesin Family Member 23	KIF23 (Kinesin Family Member 23) is a Protein Coding gene. Diseases associated with KIF23 include Anemia, Congenital Dyserythropoietic, Type Iii and Congenital Dyserythropoietic Anemia. Among its related pathways are Class I MHC mediated antigen processing and presentation and Golgi-to-ER retrograde transport. Gene Ontology (GO) annotations related to this gene include ATPase activity and microtu…		Metabolism	1.4	Plasma membranes/vesicle trafficking	Golgi-to-ER retrograde transport.		Organelle trafficking
ENSMUSG00000038520	Tbc1d17	ENSMUST00000207532.1,ENSMUST00000207293.1,ENSMUST00000149921.1,ENSMUST00000145959.7,ENSMUST00000139947.7,ENSMUST00000133846.1,ENSMUST00000130081.7,ENSMUST00000153161.1,ENSMUST00000208890.1,ENSMUST00000142098.1,ENSMUST00000047085.15,ENSMUST00000208714.1	nonsense_mediated_decay,retained_intron,protein_coding	-0.329886	5.81735	4.57819e-08	3.02618e-05	TBC1 Domain Family Member 17	Probable GTPase-activating protein for Rab8; its transient association with Rab8 is mediated by OPTN. Inhibits Rab8-mediated endocytic trafficking, such as of transferrin receptor (TfR) and reduces Rab8 recruitnment to tubules emanating from the endocytic recycling compartment (ERC). Involved in regulation of autophagy. Mediates inhibition of autophagy caused by the OPTN variant GLC1E LYS-50; the…	https://journals.plos.org/plosone/article?id=10.1371/journal.pone.0095758	Metabolism	1.4	Plasma membranes/vesicle trafficking	Endocytosis	Rab8	ER, vesicle trafficking, autophagy
ENSMUSG00000027546	Atp9a	ENSMUST00000140188.7,ENSMUST00000123156.7,ENSMUST00000109175.8,ENSMUST00000029060.10,ENSMUST00000109176.7,ENSMUST00000151610.7,ENSMUST00000156555.1,ENSMUST00000109177.7,ENSMUST00000178504.7,ENSMUST00000156397.7,ENSMUST00000147757.1	processed_transcript,retained_intron,protein_coding	-0.253133	5.15398	0.00272748	0.0470433	ATPase Phospholipid Transporting 9A	Endosome recycling from endosome to plasma membrane	https://journals.plos.org/plosone/article?id=10.1371/journal.pone.0213069 https://pubmed.ncbi.nlm.nih.gov/27733620/	Metabolism	1.4	Plasma membranes/vesicle trafficking	Endocytosis	Endosome recycling	Endosome recycling to plasma membrane
ENSMUSG00000041685	Fcho2	ENSMUST00000099277.10,ENSMUST00000040340.14,ENSMUST00000179563.7,ENSMUST00000109403.1	protein_coding	-0.21183	6.948	0.00167928	0.0339126	FCH And Mu Domain Containing Endocytic Adaptor 2	Functions in an early step of clathrin-mediated endocytosis. Has both a membrane binding/bending activity and the ability to recruit proteins essential to the formation of functional clathrin-coated pits. Has a lipid-binding activity with a preference for membranes enriched in phosphatidylserine and phosphoinositides (Pi(4,5) biphosphate) like the plasma membrane. Its membrane-bending activity mi…	https://pubmed.ncbi.nlm.nih.gov/30586737/	Metabolism	1.4	Plasma membranes/vesicle trafficking	Endocytosis	Clatherin mediated endocytosis	Clatherin mediated endocytosis, LDL receptor, transferrign receptor
ENSMUSG00000036661	Dennd3	ENSMUST00000162488.7,ENSMUST00000160727.1,ENSMUST00000159322.1,ENSMUST00000173292.7,ENSMUST00000160267.2,ENSMUST00000162824.1,ENSMUST00000043414.11	nonsense_mediated_decay,processed_transcript,retained_intron,protein_coding	-0.17324	7.52409	0.00158565	0.0326243	DENN Domain Containing 3	Guanine nucleotide exchange factor (GEF) activating RAB12. Promotes the exchange of GDP to GTP, converting inactive GDP-bound RAB12 into its active GTP-bound form (PubMed:20937701). Regulates autophagy in response to starvation through RAB12 activation. Starvation leads to ULK1/2-dependent phosphorylation of Ser-472 and Ser-490, which in turn allows recruitment of 14-3-3 adapter proteins and lead…	https://www.tandfonline.com/doi/full/10.1080/15384101.2015.1071136	Metabolism	1.4	Plasma membranes/vesicle trafficking	Endocytosis		Activates RAB12, induce autophagy, endosome recycling
ENSMUSG00000040265	Dnm3	ENSMUST00000161155.7,ENSMUST00000193110.1,ENSMUST00000159763.7,ENSMUST00000162330.7,ENSMUST00000160173.1,ENSMUST00000070330.13,ENSMUST00000086074.11,ENSMUST00000161894.1,ENSMUST00000160665.7,ENSMUST00000195403.1,ENSMUST00000161539.1,ENSMUST00000195768.1	processed_transcript,retained_intron,protein_coding	0.239086	4.65427	0.00112192	0.0256241	Dynamin 3	This gene encodes a member of a family of guanosine triphosphate (GTP)-binding proteins that associate with microtubules and are involved in vesicular transport. The encoded protein functions in the development of megakaryocytes. Alternative splicing results in multiple transcript variants. [provided by RefSeq, May 2013]GTPases are a group of enzymes that catalyze hydrolysis of the gamma phosphat…		Metabolism	1.4	Plasma membranes/vesicle trafficking	Endocytosis		dynamin, vesicle transport
ENSMUSG00000061981	Flot2	ENSMUST00000072289.11,ENSMUST00000136353.1,ENSMUST00000148162.8,ENSMUST00000100784.8,ENSMUST00000073660.6	nonsense_mediated_decay,processed_transcript,protein_coding	0.278845	3.99392	0.0024184	0.0435694	Flotillin 2	Caveolae are small domains on the inner cell membrane involved in vesicular trafficking and signal transduction. This gene encodes a caveolae-associated, integral membrane protein, which is thought to function in neuronal signaling. [provided by RefSeq, Jul 2008]	https://pubmed.ncbi.nlm.nih.gov/32225034/	Metabolism	1.4	Plasma membranes/vesicle trafficking	Endocytosis	calveoli dependent trafficking	calveolin, signaling, endocytosis, migration
ENSMUSG00000032656	March3	ENSMUST00000035278.6,ENSMUST00000153044.1,ENSMUST00000102912.7	retained_intron,protein_coding	0.31917	3.79267	0.0010889	0.025131	Membrane Associated Ring-CH-Type Finger 3	E3 ubiquitin-protein ligase which may be involved in endosomal trafficking. E3 ubiquitin ligases accept ubiquitin from an E2 ubiquitin-conjugating enzyme in the form of a thioester and then directly transfer the ubiquitin to targeted substrates		Metabolism	1.4	Plasma membranes/vesicle trafficking	Endocytosis	Trafficking	E3 ubiquitin ligase, endosomal trafficking
ENSMUSG00000022505	Emp2	ENSMUST00000078357.4	protein_coding	0.321173	5.39392	2.93786e-06	0.000400154	Epithelial Membrane Protein 2	This gene encodes a tetraspan protein of the PMP22/EMP family. The encoded protein regulates cell membrane composition. It has been associated with various functions including endocytosis, cell signaling, cell proliferation, cell migration, cell adhesion, cell death, cholesterol homeostasis, urinary albumin excretion, and embryo implantation. It is known to negatively regulate caveolin-1, a scaff…		Metabolism	1.4	Plasma membranes/vesicle trafficking	Endocytosis	calveoli dependent trafficking	Cell membrane protein composition, calveoli, MHC, ICAM, intergins
ENSMUSG00000033855	Ston1	ENSMUST00000137138.1,ENSMUST00000064035.12,ENSMUST00000112216.1,ENSMUST00000132384.1,ENSMUST00000150023.1,ENSMUST00000153613.1,ENSMUST00000163588.7	processed_transcript,retained_intron,protein_coding	0.48212	5.01818	1.06096e-05	0.000960399	Stonin 1	Endocytosis of cell surface proteins is mediated by a complex molecular machinery that assembles on the inner surface of the plasma membrane. This gene encodes one of two human homologs of the Drosophila melanogaster stoned B protein. This protein is related to components of the endocytic machinery and exhibits a modular structure consisting of an N-terminal proline-rich domain, a central region …	https://www.nature.com/articles/ncomms9535	Metabolism	1.4	Plasma membranes/vesicle trafficking	Endocytosis	important for regulating focal adhesion complexes	Focal adhesion complex, endocytosis
ENSMUSG00000028524	Sgip1	ENSMUST00000137592.7,ENSMUST00000140676.1,ENSMUST00000097948.8,ENSMUST00000183855.7,ENSMUST00000072481.11,ENSMUST00000149547.1,ENSMUST00000136164.1,ENSMUST00000106882.8,ENSMUST00000141624.1,ENSMUST00000156596.7,ENSMUST00000066824.13,ENSMUST00000080728.12,ENSMUST00000131431.1,ENSMUST00000140289.1,ENSMUST00000142430.7	nonsense_mediated_decay,processed_transcript,retained_intron,protein_coding	0.62954	0.581863	0.00132973	0.0288732	SH3GL Interacting Endocytic Adaptor 1	May function in clathrin-mediated endocytosis. Has both a membrane binding/tubulating activity and the ability to recruit proteins essential to the formation of functional clathrin-coated pits. Has a preference for membranes enriched in phosphatidylserine and phosphoinositides and is required for the endocytosis of the transferrin receptor. May also bind tubulin. May play a role in the regulation…		Metabolism	1.4	Plasma membranes/vesicle trafficking	Endocytosis	Clatherin mediated endocytosis	Endocytosis
ENSMUSG00000024301	Kifc5b	ENSMUST00000078961.4	protein_coding	0.646884	3.25669	3.50735e-07	0.000109478	kinesin family member C5B	Cterm Kinesin KCBP may bind calmodulin found in testes and corn?	https://www.ncbi.nlm.nih.gov/pmc/articles/PMC6305376/	Metabolism	1.4	Plasma membranes/vesicle trafficking	Endocytosis	Clatherin mediated endocytosis	Is there a link to cav1?, endocytosis of clatherin vesicles
ENSMUSG00000025889	Snca	ENSMUST00000204586.2,ENSMUST00000163779.7,ENSMUST00000114268.4,ENSMUST00000203177.1	processed_transcript,retained_intron,protein_coding	-0.389373	2.64115	0.00109948	0.0252914	Synuclein Alpha	Alpha-synuclein is a member of the synuclein family, which also includes beta- and gamma-synuclein. Synucleins are abundantly expressed in the brain and alpha- and beta-synuclein inhibit phospholipase D2 selectively. SNCA may serve to integrate presynaptic signaling and membrane trafficking. Defects in SNCA have been implicated in the pathogenesis of Parkinson disease. SNCA peptides are a major c…	https://www.jbc.org/content/early/2010/05/06/jbc.M110.103499	Metabolism	1.4	Plasma membranes/vesicle trafficking	Exocytosis	WPB exocytosis	alpha synuclein, WPB exocytosis, P selectin
ENSMUSG00000015377	Dennd6b	ENSMUST00000078953.7	protein_coding	-0.342203	3.28211	0.0020503	0.0386086	DENN Domain Containing 6B	DENND6B (DENN Domain Containing 6B) is a Protein Coding gene. Among its related pathways are RAB GEFs exchange GTP for GDP on RABs and Vesicle-mediated transport. Gene Ontology (GO) annotations related to this gene include Rab guanyl-nucleotide exchange factor activity. An important paralog of this gene is DENND6A.Guanine nucleotide exchange factor (GEF) for RAB14. Also has some, lesser GEF activ…	https://pubmed.ncbi.nlm.nih.gov/32281471/	Metabolism	1.4	Plasma membranes/vesicle trafficking	Exocytosis	RAB14	GEF, vesicle transport, RAB14, cell polarization
ENSMUSG00000006024	Napa	ENSMUST00000150208.7,ENSMUST00000140640.1,ENSMUST00000139507.2,ENSMUST00000127637.7,ENSMUST00000124563.7,ENSMUST00000006181.6,ENSMUST00000132828.1	nonsense_mediated_decay,retained_intron,protein_coding	-0.131173	6.91533	0.00260564	0.0458118	NSF Attachment Protein Alpha, Alpha-SNAP	his gene encodes a member of the soluble NSF attachment protein (SNAP) family. SNAP proteins play a critical role in the docking and fusion of vesicles to target membranes as part of the 20S NSF-SNAP-SNARE complex. The encoded protein plays a role in the completion of membrane fusion by mediating the interaction of N-ethylmaleimide-sensitive factor (NSF) with the vesicle-associated and membrane-a…	https://pubmed.ncbi.nlm.nih.gov/15980433/ https://pubmed.ncbi.nlm.nih.gov/24081657/	Metabolism	1.4	Plasma membranes/vesicle trafficking	Exocytosis		Vesicle transport, golgi-plasma membrane, tight junction localization, WVWF secretion
ENSMUSG00000019066	Rab3d	ENSMUST00000128442.1,ENSMUST00000119055.7,ENSMUST00000122211.7,ENSMUST00000154019.1,ENSMUST00000115351.9	retained_intron,protein_coding	0.248714	5.03203	0.00149417	0.0313245	RAB3D, Member RAS Oncogene Family	Protein transport. Probably involved in regulated exocytosis (By similarity).	https://pubmed.ncbi.nlm.nih.gov/12168804/ https://pubmed.ncbi.nlm.nih.gov/27897225/ https://pubmed.ncbi.nlm.nih.gov/28472755/	Metabolism	1.4	Plasma membranes/vesicle trafficking	Exocytosis	oncogene	Exocytosis, transcytosis, interacts with calcium, vesicle
ENSMUSG00000040722	Scamp5	ENSMUST00000215208.1,ENSMUST00000215059.1,ENSMUST00000213771.1,ENSMUST00000215734.1,ENSMUST00000214256.1,ENSMUST00000046587.7	nonsense_mediated_decay,retained_intron,protein_coding	0.272572	4.58904	3.45231e-05	0.00213739	Secretory Carrier Membrane Protein 5	Required for the calcium-dependent exocytosis of signal sequence-containing cytokines such as CCL5. Probably acts in cooperation with the SNARE machinery. May play a role in accumulation of expanded polyglutamine (polyQ) protein huntingtin (HTT) in case of endoplasmic reticulum stress by inhibiting the endocytosis pathway.	https://www.jimmunol.org/content/182/5/2986	Metabolism	1.4	Plasma membranes/vesicle trafficking	Exocytosis		Exocytosis, inflammation-cytokines
ENSMUSG00000032549	Rab6b	ENSMUST00000035155.7,ENSMUST00000189134.1	protein_coding	-0.327878	6.25113	0.000747896	0.0196587	RAB6B, Member RAS Oncogene Family	Seems to have a role in retrograde membrane traffic at the level of the Golgi complex. May function in retrograde transport in neuronal cells		Metabolism	1.4	Plasma membranes/vesicle trafficking	golgi		golgi expressed, vesicle trafficking to plasma membrane, polarization
ENSMUSG00000031916	Cog8	ENSMUST00000134772.1,ENSMUST00000122903.1,ENSMUST00000034391.3,ENSMUST00000095517.11	nonsense_mediated_decay,retained_intron,protein_coding	-0.185921	5.13265	0.000155416	0.00639539	Component Of Oligomeric Golgi Complex 8	This gene encodes a protein that is a component of the conserved oligomeric Golgi (COG) complex, a multiprotein complex that plays a structural role in the Golgi apparatus, and is involved in intracellular membrane trafficking and glycoprotein modification. Mutations in this gene cause congenital disorder of glycosylation, type IIh, a disease that is characterized by under-glycosylated serum prot…	https://pubmed.ncbi.nlm.nih.gov/28627726/?from_term=Cog8+&from_pos=4	Metabolism	1.4	Plasma membranes/vesicle trafficking	golgi		Protein trafficking, autophagy
ENSMUSG00000029344	Tpst2	ENSMUST00000031287.10,ENSMUST00000140262.1,ENSMUST00000139482.1,ENSMUST00000198502.1,ENSMUST00000071455.5,ENSMUST00000134071.7,ENSMUST00000151947.1	nonsense_mediated_decay,retained_intron,protein_coding	-0.175038	6.82916	0.000244073	0.00877646	Tyrosylprotein Sulfotransferase 2	The protein encoded by this gene catalyzes the O-sulfation of tyrosine residues within acidic regions of proteins. The encoded protein is a type II integral membrane protein found in the Golgi body. Alternative splicing produces multiple transcript variants encoding distinct isoforms. [provided by RefSeq, May 2018]		Metabolism	1.4	Plasma membranes/vesicle trafficking	golgi	Types of human proteins known to undergo tyrosine sulfation include adhesion molecules, G-protein-coupled receptors, coagulation factors, serine protease inhibitors, extracellular matrix proteins, and hormones.	Sulfation of proteins, strenghtens protein-protein interactions
ENSMUSG00000003380	Rabac1	ENSMUST00000205871.1,ENSMUST00000206222.1,ENSMUST00000076961.8,ENSMUST00000205771.1,ENSMUST00000206941.1,ENSMUST00000206868.1	processed_transcript,retained_intron,protein_coding	-0.157344	6.95072	0.000273287	0.00947818	Rab Acceptor 1	General Rab protein regulator required for vesicle formation from the Golgi complex. May control vesicle docking and fusion by mediating the action of Rab GTPases to the SNARE complexes. In addition it inhibits the removal of Rab GTPases from the membrane by GDI.		Metabolism	1.4	Plasma membranes/vesicle trafficking	Golgi	Golgi vesicle formation, vesicle trafficking	Golgi vesicle formation, vesicle trafficking
ENSMUSG00000021556	Golm1	ENSMUST00000022039.5,ENSMUST00000095739.8	protein_coding	0.35325	5.79808	4.49645e-06	0.000521933	Golgi Membrane Protein 1	The Golgi complex plays a key role in the sorting and modification of proteins exported from the endoplasmic reticulum. The protein encoded by this gene is a type II Golgi transmembrane protein. It processes proteins synthesized in the rough endoplasmic reticulum and assists in the transport of protein cargo through the Golgi apparatus. The expression of this gene has been observed to be upregula…		Metabolism	1.4	Plasma membranes/vesicle trafficking	golgi	Organelle	Golgi, protein trafficking
ENSMUSG00000027955	Fam198b	ENSMUST00000029567.8,ENSMUST00000145992.1,ENSMUST00000118853.7,ENSMUST00000193204.1,ENSMUST00000135021.1	retained_intron,protein_coding	0.353449	5.54647	3.28158e-06	0.000438989	GASK1B, Golgi Associated Kinase 1B	?	?	Metabolism	1.4	Plasma membranes/vesicle trafficking	golgi		Golgi
ENSMUSG00000002395	Use1	ENSMUST00000110054.7,ENSMUST00000127517.1,ENSMUST00000137137.1,ENSMUST00000140236.1,ENSMUST00000143657.7,ENSMUST00000110053.8,ENSMUST00000139541.7,ENSMUST00000019169.7,ENSMUST00000154550.7,ENSMUST00000136368.7,ENSMUST00000142685.7,ENSMUST00000146221.7	retained_intron,protein_coding	-0.172453	5.73802	0.0015494	0.0321422	Unconventional SNARE In The ER 1	SNARE that may be involved in targeting and fusion of Golgi-derived retrograde transport vesicles with the ER.	https://pubmed.ncbi.nlm.nih.gov/12853481/	Metabolism	1.4	Plasma membranes/vesicle trafficking	Intracellular vesicle	golgi - er transport	Vesicle transport, golgi-ER retrograde trafficking
ENSMUSG00000022946	Dopey2	ENSMUST00000045004.9	protein_coding	-0.168352	7.07736	0.00162066	0.0332022	DOP1 Leucine Zipper Like Protein B	May be involved in protein traffic between late Golgi and early endosomes		Metabolism	1.4	Plasma membranes/vesicle trafficking	Intracellular vesicle	Golgi-endosome	Golgi trafficking, ALzheiemrs disease risk
ENSMUSG00000049550	Clip1	ENSMUST00000063905.11,ENSMUST00000144121.1,ENSMUST00000133545.7,ENSMUST00000199018.1,ENSMUST00000125340.7,ENSMUST00000137602.7,ENSMUST00000031382.13,ENSMUST00000137363.7,ENSMUST00000111561.7,ENSMUST00000149410.1,ENSMUST00000198833.1,ENSMUST00000154672.1,ENSMUST00000111564.7,ENSMUST00000154432.1,ENSMUST00000111566.8	nonsense_mediated_decay,processed_transcript,retained_intron,protein_coding	-0.150421	7.88482	0.00191495	0.0371006	CAP-Gly Domain Containing Linker Protein 1	Binds to the plus end of microtubules and regulates the dynamics of the microtubule cytoskeleton. Promotes microtubule growth and microtubule bundling. Links cytoplasmic vesicles to microtubules and thereby plays an important role in intracellular vesicle trafficking.		Metabolism	1.4	Plasma membranes/vesicle trafficking	Intracellular vesicle		Organnelle trafficking
ENSMUSG00000039232	Stx11	ENSMUST00000042861.6,ENSMUST00000163425.8,ENSMUST00000218685.1,ENSMUST00000219727.1	protein_coding	0.328919	3.94203	0.00013517	0.00582984	Syntaxin 11	This gene encodes a member of the syntaxin family. Syntaxins have been implicated in the targeting and fusion of intracellular transport vesicles. This family member may regulate protein transport among late endosomes and the trans-Golgi network. Mutations in this gene have been associated with familial hemophagocytic lymphohistiocytosis. [provided by RefSeq, Jul 2008]		Metabolism	1.4	Plasma membranes/vesicle trafficking	Intracellular vesicle	Vesicle trafficking	Vesicle trafficiking, SNARE comlplex, calveoli, secretion of vwf
ENSMUSG00000021903	Galnt15	ENSMUST00000164208.1,ENSMUST00000022460.10	protein_coding	-0.226136	10.0344	0.00231984	0.0423871	Polypeptide N-Acetylgalactosaminyltransferase 15	Catalyzes the initial reaction in O-linked oligosaccharide biosynthesis, the transfer of an N-acetyl-D-galactosamine residue to a serine or threonine residue on the protein receptor. Although it displays a much weaker activity toward all substrates tested compared to GALNT2, it is able to transfer up to seven GalNAc residues to the Muc5AC peptide, suggesting that it can fill vicinal Thr/Ser resid…	https://www.ncbi.nlm.nih.gov/pmc/articles/PMC320498/	Metabolism	1.4	Plasma membranes/vesicle trafficking	Plamsa membrane	O-linked glcosylation, particularly muc1	Glycosylation
ENSMUSG00000024843	Chka	ENSMUST00000153343.1,ENSMUST00000125013.1,ENSMUST00000125640.1,ENSMUST00000127544.1,ENSMUST00000148325.7,ENSMUST00000125411.7,ENSMUST00000072055.12,ENSMUST00000154467.7,ENSMUST00000128694.7,ENSMUST00000124219.1,ENSMUST00000139655.7,ENSMUST00000025760.12,ENSMUST00000146463.7,ENSMUST00000125859.7	nonsense_mediated_decay,processed_transcript,retained_intron,protein_coding	-0.165057	5.93154	0.00196615	0.0376381	Choline Kinase Alpha	The major pathway for the biosynthesis of phosphatidylcholine occurs via the CDP-choline pathway. The protein encoded by this gene is the initial enzyme in the sequence and may play a regulatory role. The encoded protein also catalyzes the phosphorylation of ethanolamine. Two transcript variants encoding different isoforms have been found for this gene. [provided by RefSeq, Jul 2008]Has a key rol…		Metabolism	1.4	Plasma membranes/vesicle trafficking	Plamsa membrane		Phosphatidlycholine production, plasma membrance constituent
ENSMUSG00000035863	Palm	ENSMUST00000218631.1,ENSMUST00000046945.12,ENSMUST00000218924.1,ENSMUST00000219711.1,ENSMUST00000217759.1,ENSMUST00000105379.2,ENSMUST00000220365.1,ENSMUST00000218857.1	processed_transcript,protein_coding	-0.150195	5.81488	0.00251964	0.0447285	Paralemmin	This gene encodes a member of the paralemmin protein family. The product of this gene is a prenylated and palmitoylated phosphoprotein that associates with the cytoplasmic face of plasma membranes and is implicated in plasma membrane dynamics in neurons and other cell types. Several alternatively spliced transcript variants have been identified, but the full-length nature of only two transcript v…		Metabolism	1.4	Plasma membranes/vesicle trafficking	Plamsa membrane	, it may link the cytoskeleton to the plasma membrane and thereby modulate lymphatic endothelial cell adhesion, migration and lymphangiogenesis.	Link cyctoskeleton to plasma membrane, migration
ENSMUSG00000075703	Selenoi	ENSMUST00000132404.7,ENSMUST00000151795.2,ENSMUST00000151468.1,ENSMUST00000138001.7,ENSMUST00000197299.4,ENSMUST00000145167.7,ENSMUST00000198788.1,ENSMUST00000145858.7	nonsense_mediated_decay,processed_transcript,retained_intron,protein_coding	0.201678	4.89082	0.000406965	0.0127561	Selenoprotein I	The multi-pass transmembrane protein encoded by this gene belongs to the CDP-alcohol phosphatidyltransferase class-I family. It catalyzes the transfer of phosphoethanolamine from CDP-ethanolamine to diacylglycerol to produce phosphatidylethanolamine, which is involved in the formation and maintenance of vesicular membranes, regulation of lipid metabolism, and protein folding. This protein is a se…		Metabolism	1.4	Plasma membranes/vesicle trafficking	Plamsa membrane	Vesicle	Membrane phospholipids, vesicular membranes, regulation of lipid metabolism, and protein folding
ENSMUSG00000031441	Atp11a	ENSMUST00000132974.7,ENSMUST00000139545.1,ENSMUST00000091237.11,ENSMUST00000152273.1,ENSMUST00000125031.1,ENSMUST00000131804.1,ENSMUST00000033818.9,ENSMUST00000136918.1,ENSMUST00000127197.1,ENSMUST00000143359.7,ENSMUST00000133338.7	nonsense_mediated_decay,processed_transcript,retained_intron,protein_coding	0.203433	8.33241	0.000169659	0.0067605	ATPase phospholipid transporting 11A	Catalytic component of a P4-ATPase flippase complex which catalyzes the hydrolysis of ATP coupled to the transport of aminophospholipids from the outer to the inner leaflet of various membranes and ensures the maintenance of asymmetric distribution of phospholipids. Phospholipid translocation seems also to be implicated in vesicle formation and in uptake of lipid signaling molecules (Probable). M…		Metabolism	1.4	Plasma membranes/vesicle trafficking	Plamsa membrane		ER, golgi, endosome membrane symetry, lipid symetry, calcium signaling
ENSMUSG00000032252	Glce	ENSMUST00000185510.1,ENSMUST00000185873.1,ENSMUST00000034785.7,ENSMUST00000186514.1,ENSMUST00000185675.6	processed_transcript,retained_intron,protein_coding	0.228294	5.3973	0.000512129	0.0148895	Glucuronic Acid Epimerase	Convertsi D-glucuronc acid residues adjacent to N-sulfate sugar residues to L-iduronic acid residues, both in maturing heparan sulfate (HS) and heparin chains. This is important for further modifications that determine the specificity of interactions between these glycosaminoglycans and proteins.	https://pubmed.ncbi.nlm.nih.gov/32489319/?from_term=Glce&from_sort=pubdate&from_pos=1	Metabolism	1.4	Plasma membranes/vesicle trafficking	Plamsa membrane		Heparin production, heparin suplates
ENSMUSG00000028334	Nans	ENSMUST00000137874.1,ENSMUST00000030018.4,ENSMUST00000132345.1,ENSMUST00000150584.7	processed_transcript,protein_coding	0.239573	5.63711	0.00129477	0.0283955	N-Acetylneuraminate Synthase	This gene encodes an enzyme that functions in the biosynthetic pathways of sialic acids. In vitro, the encoded protein uses N-acetylmannosamine 6-phosphate and mannose 6-phosphate as substrates to generate phosphorylated forms of N-acetylneuraminic acid (Neu5Ac) and 2-keto-3-deoxy-D-glycero-D-galacto-nononic acid (KDN), respectively; however, it exhibits much higher activity toward the Neu5Ac pho…		Metabolism	1.4	Plasma membranes/vesicle trafficking	Plamsa membrane	sialic acid used as glycoproteins on cell membrane, provide negative charge to prevent aggregation,	Sialic acid production (Neu5Ac), cell adhesion, aggreation
ENSMUSG00000037752	Xkr8	ENSMUST00000045550.4,ENSMUST00000150104.1,ENSMUST00000143642.1	processed_transcript,protein_coding	0.290399	3.44626	0.00115138	0.025959	XK Related 8	Promotes phosphatidylserine exposure on apoptotic cell surface, possibly by mediating phospholipid scrambling. Phosphatidylserine is a specific marker only present at the surface of apoptotic cells and acts as a specific signal for engulfment. Has no effect on calcium-induced exposure of phosphatidylserine. Activated upon caspase cleavage, suggesting that it does not act prior the onset of apopto…		Metabolism	1.4	Plasma membranes/vesicle trafficking	Plamsa membrane		phospholipid scrambling protein
ENSMUSG00000032372	Plscr2	ENSMUST00000156772.1,ENSMUST00000113044.2,ENSMUST00000126911.1,ENSMUST00000180154.7,ENSMUST00000034932.13	retained_intron,protein_coding	0.299811	4.71883	0.000920115	0.0225503	Phospholipid Scramblase 2, Ca(2+)-Dependent Phospholipid Scramblase 2	This gene encodes a member of the phospholipid scramblase family. Phospholipid scramblases are membrane proteins that mediate calcium-dependent, non-specific movement of plasma membrane phospholipids and phosphatidylserine exposure. The encoded protein contains a low affinity calcium binding motif and may play a role in blood coagulation and apoptosis. Alternatively spliced transcript variants en…		Metabolism	1.4	Plasma membranes/vesicle trafficking	Plamsa membrane		Phospholipid bilayer movement, calcium signaling
ENSMUSG00000020183	Cpm	ENSMUST00000020399.5,ENSMUST00000141991.1,ENSMUST00000123374.7,ENSMUST00000138020.7	processed_transcript,retained_intron,protein_coding	0.357667	7.06206	0.000963999	0.0233458	Carboxypeptidase M	Specifically removes C-terminal basic residues (Arg or Lys) from peptides and proteins. It is believed to play important roles in the control of peptide hormone and growth factor activity at the cell surface, and in the membrane-localized degradation of extracellular proteins.	https://www.sciencedirect.com/topics/biochemistry-genetics-and-molecular-biology/carboxypeptidase-m https://pubmed.ncbi.nlm.nih.gov/18957287/	Metabolism	1.4	Plasma membranes/vesicle trafficking	Plamsa membrane	plasma membrane located, roel in protein processing or degradation of extracellalar proteins	Protein processing at plasma membrane, both extracellualr and membrane assocviated
ENSMUSG00000032369	Plscr1	ENSMUST00000093801.9,ENSMUST00000187952.1,ENSMUST00000186364.1	retained_intron,protein_coding	0.472728	4.17532	2.73583e-06	0.000384187	Phospholipid Scramblase 1	May mediate accelerated ATP-independent bidirectional transbilayer migration of phospholipids upon binding calcium ions that results in a loss of phospholipid asymmetry in the plasma membrane. May play a central role in the initiation of fibrin clot formation, in the activation of mast cells and in the recognition of apoptotic and injured cells by the reticuloendothelial system. PLS1_HUMAN,O15162…	https://www.ncbi.nlm.nih.gov/pmc/articles/PMC4600063/	Metabolism	1.4	Plasma membranes/vesicle trafficking	Plamsa membrane	Important for lipid composition of membrane. See cite: hypoxia - upregulates plscr1 - inflammation (aa/cox2)	Plamsa membrane phospholipid symetry, hypoxia, arachadonic acid, calcium
ENSMUSG00000038732	Mboat1	ENSMUST00000153269.1,ENSMUST00000047311.14,ENSMUST00000152798.1	processed_transcript,protein_coding	0.532731	2.81274	0.000256102	0.009064	Membrane Bound O-Acyltransferase Domain Containing 1	This gene belongs to the membrane-bound O-acetyltransferase superfamily. The encoded transmembrane protein is an enzyme that transfers organic compounds, preferably from oleoyl-CoA, to hydroxyl groups of protein targets in membranes. A translocation disrupting this gene may be associated with brachydactyly syndactyly syndrome. Alternately spliced transcript variants have been described for this g…	https://www.mdpi.com/2079-7737/6/2/23/htm https://www.nature.com/articles/5201833	Metabolism	1.4	Plasma membranes/vesicle trafficking	Plamsa membrane	Transfer fatty acids onlto membrane proteins\	Phospholipid remodelling (plasma membrane)
ENSMUSG00000038173	Enpp6	ENSMUST00000149593.1,ENSMUST00000039840.14,ENSMUST00000123066.2,ENSMUST00000140149.1,ENSMUST00000119686.1,ENSMUST00000210466.1	nonsense_mediated_decay,retained_intron,protein_coding	0.801548	1.37088	6.18356e-05	0.00326987	ectonucleotide pyrophosphatase/phosphodiesterase 6	Hydrolyse plasma lysophosphatidylcholine (LPC) to form monoacylglycerol and phosphorylcholine, Purinergic signaling, neuroinflammaiton. n vitro, hydrolyzes only choline-containing lysophospholipids, such as sphingosylphosphorylcholine (SPC), platelet-activating factor (PAF) and lysoPAF, but not other lysophospholipids (By similarity). ENPP6_HUMAN,Q6UWR7	https://www.ncbi.nlm.nih.gov/pmc/articles/PMC4757880/	Metabolism	1.4	Plasma membranes/vesicle trafficking	Plamsa membrane	Supply choline to the cell for membrane production	Choline production
ENSMUSG00000004187	Kifc2	ENSMUST00000004294.10	protein_coding	-0.407068	3.11554	0.000850126	0.0213619	Kinesin Family Member C2	ay play a role in microtubule-dependent retrograde axonal transport. May function as the motor for the transport of multivesicular body (MVB)-like organelles in dendrites (By similarity).	https://pubmed.ncbi.nlm.nih.gov/32084403/?from_term=Kifc2+&from_sort=pubdate&from_pos=2	Metabolism	1.4	Plasma membranes/vesicle trafficking	Trafficking	organelles	Microtubule organization, polarization
ENSMUSG00000021294	Kif26a	ENSMUST00000128402.2,ENSMUST00000183816.1	processed_transcript,protein_coding	-0.3755	9.07911	2.20954e-07	8.14052e-05	Kinesin Family Member 26A	Atypical kinesin that repressing a cell growth signaling pathway in the enteric nervous system development, possibly via its interaction with GRB2 that prevents GRB2-binding to SHC, thereby attenating the GDNF-Ret signaling. Binds to MT but may lack MT-based motility. KIF26A (Kinesin Family Member 26A) is a Protein Coding gene. Diseases associated with KIF26A include Hirschsprung Disease 1. Among…	https://www.ncbi.nlm.nih.gov/pmc/articles/PMC4791138/	Metabolism	1.4	Plasma membranes/vesicle trafficking	Trafficking	Loss of leads to imapaired angiogenesis	endothelial cell polarity, MHC class I presentation, angiogenesis, cytoskeleton rearrangement
ENSMUSG00000030161	Gabarapl1	ENSMUST00000204956.1,ENSMUST00000204639.1,ENSMUST00000204487.2,ENSMUST00000032264.8	protein_coding	-0.358216	7.94299	1.18336e-07	5.4275e-05	Gaba type a receptor associated protein like 1	Ubiquitin-like modifier that increases cell-surface expression of kappa-type opioid receptor through facilitating anterograde intracellular trafficking of the receptor. Involved in formation of autophagosomal vacuoles. Whereas LC3s are involved in elongation of the phagophore membrane, the GABARAP/GATE-16 subfamily is essential for a later stage in autophagosome maturation (PubMed:16431922, PubMe…	https://www.ncbi.nlm.nih.gov/pubmed/31433094 https://www.ncbi.nlm.nih.gov/pmc/articles/PMC4791138/	Metabolism	1.4	Plasma membranes/vesicle trafficking	Trafficking		Autophagy, inflammation, ER stress , lysosomes, migration, angiognesis,
ENSMUSG00000020894	Vamp2	ENSMUST00000146847.1,ENSMUST00000149559.1,ENSMUST00000117780.1,ENSMUST00000021273.12,ENSMUST00000149780.1	processed_transcript,retained_intron,protein_coding	-0.267389	6.41834	4.48897e-06	0.000521933	Vesicle Associated Membrane Protein 2	The protein encoded by this gene is a member of the vesicle-associated membrane protein (VAMP)/synaptobrevin family. Synaptobrevins/VAMPs, syntaxins, and the 25-kD synaptosomal-associated protein SNAP25 are the main components of a protein complex involved in the docking and/or fusion of synaptic vesicles with the presynaptic membrane. This gene is thought to participate in neurotransmitter relea…	https://pubmed.ncbi.nlm.nih.gov/10600840/	Metabolism	1.4	Plasma membranes/vesicle trafficking	Trafficking	calveoli dependent trafficking	Calveoli-clatherin dependent transport, ion channel activity (postassium and calcium)
ENSMUSG00000036206	Sh3bp4	ENSMUST00000123745.1,ENSMUST00000066279.10	processed_transcript,protein_coding	-0.197485	7.86428	3.54316e-05	0.00217555	SH3 domain-binding protein 4	May function in transferrin receptor internalization at the plasma membrane through a cargo-specific control of clathrin-mediated endocytosis. Alternatively, may act as a negative regulator of the amino acid-induced TOR signaling by inhibiting the formation of active Rag GTPase complexes. Preferentially binds inactive Rag GTPase complexes and prevents their interaction with the mTORC1 complex inh…	https://www.ncbi.nlm.nih.gov/pmc/articles/PMC3389276/ https://www.ncbi.nlm.nih.gov/pmc/articles/PMC3887856/ https://www.molbiolcell.org/doi/full/10.1091/mbc.e09-09-0756	Metabolism	1.4	Plasma membranes/vesicle trafficking	Trafficking	Amino acids stimulate cell growth and suppress autophagy through activation of mTORC1. Here, we identify SH3BP4 (SH3 domain-binding protein 4) as a binding protein and a negative regulator of Rag GTPase complex. SH3BP4 binds to the inactive Rag GTPase complex through its Src homology 3 (SH3) domain under conditions of amino acid starvation and inhibits the formation of active Rag GTPase complex. …	mTOR signaling, lysosome, autophagy, amino acids, transferrin receptor, iron
ENSMUSG00000032127	Vps11	ENSMUST00000214510.1,ENSMUST00000034644.9,ENSMUST00000213249.1,ENSMUST00000214460.1,ENSMUST00000213740.1,ENSMUST00000216089.1	nonsense_mediated_decay,retained_intron,protein_coding	-0.186549	5.77162	0.00133213	0.0288732	VPS11 Core Subunit Of CORVET And HOPS Complexes	Vesicle mediated protein sorting plays an important role in segregation of intracellular molecules into distinct organelles. Genetic studies in yeast have identified more than 40 vacuolar protein sorting (VPS) genes involved in vesicle transport to vacuoles. This gene encodes the human homolog of yeast class C Vps11 protein. The mammalian class C Vps proteins are predominantly associated with lat…	https://pubmed.ncbi.nlm.nih.gov/31015428/	Metabolism	1.4	Plasma membranes/vesicle trafficking	Trafficking		Endoctyosis, organnelle sorting, late endosome-lysosome trafficking, ubiquitin ligase
ENSMUSG00000028456	Unc13b	ENSMUST00000207569.1,ENSMUST00000207708.1,ENSMUST00000163653.7,ENSMUST00000126878.1,ENSMUST00000149945.2,ENSMUST00000171234.1,ENSMUST00000153168.2,ENSMUST00000143653.2,ENSMUST00000145899.1,ENSMUST00000107952.8,ENSMUST00000079978.12,ENSMUST00000151611.8,ENSMUST00000168032.1,ENSMUST00000127597.1,ENSMUST00000132310.8,ENSMUST00000107953.8	processed_transcript,retained_intron,protein_coding	-0.169779	7.61435	0.00139545	0.0298491	Unc-13 Homolog B	This gene is expressed in the kidney cortical epithelial cells and is upregulated by hyperglycemia. The encoded protein shares a high level of similarity to the rat homolog, and contains 3 C2 domains and a diacylglycerol-binding C1 domain. Hyperglycemia increases the levels of diacylglycerol, which has been shown to induce apoptosis in cells transfected with this gene and thus contribute to the r…	https://pubmed.ncbi.nlm.nih.gov/27548575/	Metabolism	1.4	Plasma membranes/vesicle trafficking	Trafficking	?	Vesicle secretion, DAG and calcium regualted,ion channel function, angiopoietin 2 secretion	Yes, angiopoietin
ENSMUSG00000047459	Dynlrb1	ENSMUST00000150602.1,ENSMUST00000109682.8,ENSMUST00000054912.14,ENSMUST00000135831.1	processed_transcript,protein_coding	0.154419	6.79314	0.000936312	0.0228476	Dynein Light Chain Roadblock-Type 1	This gene is a member of the roadblock dynein light chain family. The encoded cytoplasmic protein is capable of binding intermediate chain proteins, interacts with transforming growth factor-beta, and has been implicated in the regulation of actin modulating proteins. Upregulation of this gene has been associated with hepatocellular carcinomas, suggesting that this gene may be involved in tumor p…	https://pubmed.ncbi.nlm.nih.gov/30649997/?from_term=Dynlrb1&from_sort=pubdate&from_pos=3 https://pubmed.ncbi.nlm.nih.gov/31393067/?from_term=Dynlrb1&from_sort=pubdate&from_pos=2	Metabolism	1.4	Plasma membranes/vesicle trafficking	Trafficking		Actin, dynein, organelle trafficking, cilia, MAPK signaling
ENSMUSG00000027377	Mall	ENSMUST00000028856.2	protein_coding	0.261833	6.73196	1.46234e-06	0.000254765	Mal, T Cell Differentiation Protein Like, BENE	This gene encodes an element of the machinery for raft-mediated trafficking in endothelial cells. The encoded protein, a member of the MAL proteolipid family, predominantly localizes in glycolipid- and cholesterol-enriched membrane (GEM) rafts. It interacts with caveolin-1. [provided by RefSeq, Jul 2008]		Metabolism	1.4	Plasma membranes/vesicle trafficking	Trafficking	calveoli dependent trafficking	Calveoli, lipid rafts,
ENSMUSG00000032118	Fez1	ENSMUST00000161500.7,ENSMUST00000216539.1,ENSMUST00000161978.1,ENSMUST00000162633.8,ENSMUST00000159137.1,ENSMUST00000034630.14,ENSMUST00000162235.1,ENSMUST00000160041.1,ENSMUST00000163816.7,ENSMUST00000214772.1	nonsense_mediated_decay,processed_transcript,retained_intron,protein_coding	0.349928	3.72913	0.001681	0.0339126	Fasciculation And Elongation Protein Zeta 1,UNC-76	May be involved in axonal outgrowth as component of the network of molecules that regulate cellular morphology and axon guidance machinery. Able to restore partial locomotion and axonal fasciculation to C.elegans unc-76 mutants in germline transformation experiments. May participate in the transport of mitochondria and other cargos along microtubules.	https://pubmed.ncbi.nlm.nih.gov/20730382/ https://pubmed.ncbi.nlm.nih.gov/29895958/	Metabolism	1.4	Plasma membranes/vesicle trafficking	Trafficking		Microtubule binding, mitochondria trafficking,
ENSMUSG00000036768	Kif15	ENSMUST00000214652.1,ENSMUST00000217612.1,ENSMUST00000214880.1,ENSMUST00000214921.1,ENSMUST00000040717.6,ENSMUST00000216048.1,ENSMUST00000217415.1,ENSMUST00000214183.1,ENSMUST00000214311.1,ENSMUST00000216491.1,ENSMUST00000215176.1,ENSMUST00000216062.1,ENSMUST00000217401.1,ENSMUST00000216388.1,ENSMUST00000213745.1,ENSMUST00000213945.1,ENSMUST00000216730.1	nonsense_mediated_decay,processed_transcript,retained_intron,protein_coding	0.615788	4.33664	7.72333e-06	0.000774884	Kinesin Family Member 15	KIF15 (Kinesin Family Member 15) is a Protein Coding gene. Diseases associated with KIF15 include 21Q22.11Q22.12 Microdeletion Syndrome and Breast Cancer. Among its related pathways are Class I MHC mediated antigen processing and presentation and Golgi-to-ER retrograde transport. Gene Ontology (GO) annotations related to this gene include ATPase activity and microtubule motor activity. An importa…		Metabolism	1.4	Plasma membranes/vesicle trafficking	Trafficking
ENSMUSG00000024795	Kif20b	ENSMUST00000087341.5	protein_coding	0.648642	4.56428	2.12703e-06	0.000331932	Kinesin Family Member 20B	Proliferation, cytosketeton, vesicle transport?	https://www.ncbi.nlm.nih.gov/pmc/articles/PMC4791138/	Metabolism	1.4	Plasma membranes/vesicle trafficking	Trafficking	Found in a recent RNA-seq paper as linked to a dysfunctional BBB	Polarization, migration, organnelle trafficking
ENSMUSG00000003779	Kif20a	ENSMUST00000166044.1,ENSMUST00000167161.7	protein_coding	0.706804	6.32158	2.05039e-05	0.00152081	Kinesin Family Member 20A	Mitotic kinesin required for chromosome passenger complex (CPC)-mediated cytokinesis. Following phosphorylation by PLK1, involved in recruitment of PLK1 to the central spindle. Interacts with guanosine triphosphate (GTP)-bound forms of RAB6A and RAB6B. May act as a motor required for the retrograde RAB6 regulated transport of Golgi membranes and associated vesicles along microtubules. Has a micro…		Metabolism	1.4	Plasma membranes/vesicle trafficking	Trafficking		Organelle trafficking, auroa kinase
ENSMUSG00000021280	Exoc3l4	ENSMUST00000072646.6	protein_coding	0.429883	2.85288	0.0027985	0.0480103	Exocyst Complex Component 3 Like 4	EXOC3L4 (Exocyst Complex Component 3 Like 4) is a Protein Coding gene. Diseases associated with EXOC3L4 include Seckel Syndrome 1 and Inflammatory Bowel Disease 26. Gene Ontology (GO) annotations related to this gene include SNARE binding. An important paralog of this gene is TNFAIP2.	https://pubmed.ncbi.nlm.nih.gov/30255815/	Metabolism	1.4	Plasma membranes/vesicle trafficking	Vesicle		AD risk factor, vesicle trafficking, glucose metabolism
ENSMUSG00000027875	Hmgcs2	ENSMUST00000090746.2,ENSMUST00000120541.7	protein_coding	-0.632446	5.83361	9.43272e-05	0.00449133	3-Hydroxy-3-Methylglutaryl-CoA Synthase 2	The protein encoded by this gene belongs to the HMG-CoA synthase family. It is a mitochondrial enzyme that catalyzes the first reaction of ketogenesis, a metabolic pathway that provides lipid-derived energy for various organs during times of carbohydrate deprivation, such as fasting. Mutations in this gene are associated with HMG-CoA synthase deficiency. Alternatively spliced transcript variants …	https://www.sciencedirect.com/science/article/abs/pii/S2468202017301134 http://dm5migu4zj3pb.cloudfront.net/manuscripts/76000/76388/JCI76388.v2.pdfhttps://www.google.com/search?q=hmgcs2&rlz=1C1QJDB_enUS647US647&sxsrf=ALeKk03tl9QbQ_fjGCamCJBaubIoLzT8RQ:1591309213634&source=lnms&tbm=isch&sa=X&ved=2ahUKEwj21p_jmOnpAhVYVs0KHaG9A94Q_AUoA3oECAwQBQ&biw=1920&bih=969#imgrc=pMoYdoi56mDfZM	Metabolism	1.5	Fatty acid	ketogenesis	Target of wnt and PPARg, important for fatty acid oxidation. Ketone bodies are the water-soluble molecules (acetoacetate, beta-hydroxybutyrate, and the spontaneous breakdown product of acetoacetate, acetone) containing the ketone group. Coverted to acetyl coA	Mitochondria ketogenesis, provides energy from lipids, ketone body metabolism
ENSMUSG00000021226	Acot2	ENSMUST00000021649.7	protein_coding	-0.379707	2.6366	0.00103495	0.0241783	Acyl-CoA thioesterase 2, mitochondrial	Acyl-CoA thioesterases are a group of enzymes that catalyze the hydrolysis of acyl-CoAs to the free fatty acid and coenzyme A (CoASH), providing the potential to regulate intracellular levels of acyl-CoAs, free fatty acids and CoASH (PubMed:16940157). Acyl-coenzyme A thioesterase 2/ACOT2 displays higher activity toward long chain acyl CoAs (C14-C20) (PubMed:16940157, PubMed:10944470). The enzyme …	https://www.jbc.org/content/early/2019/11/01/jbc.RA119.010901.full.pdf https://www.cell.com/action/showPdf?pii=S1043-2760%2817%2930035-8 https://www.ncbi.nlm.nih.gov/pmc/articles/PMC4242439/	Metabolism	1.5	Fatty acid		High levels promote fatty acid oxidation ltogether, our findings indicate that Acot2 can enhance FAO, possibly by mitigating the accumulation of FAO intermediates within the mitochondrial matrix.	Mitochondria fatty acid oxidation
ENSMUSG00000041920	Slc16a6	ENSMUST00000070872.12,ENSMUST00000168740.2,ENSMUST00000070152.11,ENSMUST00000129901.1,ENSMUST00000032206.8	processed_transcript,protein_coding	-0.348837	5.0916	3.28481e-05	0.00207659	MCT6	Proton-linked monocarboxylate transporter. Catalyzes the rapid transport across the plasma membrane of many monocarboxylates such as lactate, pyruvate, branched-chain oxo acids derived from leucine, valine and isoleucine, and the ketone bodies acetoacetate, beta-hydroxybutyrate and acetate (By similarity).	https://www.ncbi.nlm.nih.gov/pubmed/23935065 https://www.ncbi.nlm.nih.gov/pmc/articles/PMC4990061/	Metabolism	1.5	Fatty acid	ketogenesis	The substrates of MCP6 are not really known, seems atypical (i.e. not lactic acid) e.g. flavanoids. Drug substrates include bumetanide), the antidiabetic drug nateglinide or the uricosuric agent probenecid	MCP6, bumetanide
ENSMUSG00000028672	Hmgcl	ENSMUST00000148613.1,ENSMUST00000135644.1,ENSMUST00000134135.7,ENSMUST00000030432.7,ENSMUST00000151879.1	processed_transcript,protein_coding	-0.287262	5.9659	2.11077e-06	0.00033173	3-Hydroxy-3-Methylglutaryl-CoA Lyase	The protein encoded by this gene belongs to the HMG-CoA lyase family. It is a mitochondrial enzyme that catalyzes the final step of leucine degradation and plays a key role in ketone body formation. Mutations in this gene are associated with HMG-CoA lyase deficiency. Alternatively spliced transcript variants encoding different isoforms have been found for this gene. [provided by RefSeq, Oct 2009]…	https://www.ncbi.nlm.nih.gov/pmc/articles/PMC5852826/	Metabolism	1.5	Fatty acid	ketogenesis	etone bodies (beta-hydroxybutyrate, acetoacetate and acetone) are essential as an alternative source of energy to glucose, as lipid precursors and as regulators of metabolism. ketone bodies can be converted into acetyl-CoA, which then enters the citric acid cycle and is oxidized in the mitochondria for energy.[3] In the brain, ketone bodies are also used to make acetyl-CoA into long-chain fatty a…	Mitochondria, leucine degradation, ketone formation, acetyl coA, long chain fatty acid production
ENSMUSG00000036880	Acaa2	ENSMUST00000041053.9	protein_coding	-0.22502	4.53484	0.00186798	0.0365866	acetyl-Coenzyme A acyltransferase 2, mitochondrial	In the production of energy from fats, this is one of the enzymes that catalyzes the last step of the mitochondrial beta-oxidation pathway, an aerobic process breaking down fatty acids into acetyl-CoA (Probable). Using free coenzyme A/CoA, catalyzes the thiolytic cleavage of medium- to long-chain unbranched 3-oxoacyl-CoAs into acetyl-CoA and a fatty acyl-CoA shortened by two carbon atoms (Probabl…		Metabolism	1.5	Fatty acid		https://www.sciencedirect.com/science/article/pii/S0022030212003153	Fatty acid metabolism, beta oxidation, mitochondria
ENSMUSG00000024132	Eci1	ENSMUST00000024946.5	protein_coding	-0.224097	4.06506	0.00294301	0.0494698	Enoyl-CoA Delta Isomerase 1	This gene encodes a member of the hydratase/isomerase superfamily. The protein encoded is a key mitochondrial enzyme involved in beta-oxidation of unsaturated fatty acids. It catalyzes the transformation of 3-cis and 3-trans-enoyl-CoA esters arising during the stepwise degradation of cis-, mono-, and polyunsaturated fatty acids to the 2-trans-enoyl-CoA intermediates. Alternatively spliced transcr…	https://pubmed.ncbi.nlm.nih.gov/22782973/	Metabolism	1.5	Fatty acid			Fatty acid beta oxidation, mitochondria
ENSMUSG00000036138	Acaa1a	ENSMUST00000175719.1,ENSMUST00000176351.7,ENSMUST00000176007.1,ENSMUST00000176397.7,ENSMUST00000175743.7,ENSMUST00000039784.11,ENSMUST00000176796.7,ENSMUST00000175859.1,ENSMUST00000177463.7,ENSMUST00000176546.1	nonsense_mediated_decay,retained_intron,protein_coding	-0.195104	5.76331	0.000146147	0.00613002	acetyl-Coenzyme A acyltransferase 1A	Involved in several processes, including fatty acid beta-oxidation; response to nutrient; and response to steroid hormone. Localizes to the peroxisome.	https://link.springer.com/chapter/10.1007/978-3-7091-1788-0_8	Metabolism	1.5	Fatty acid	peroxisome		Peroxisome, fatty acid metabolism
ENSMUSG00000029056	Pank4	ENSMUST00000148299.7,ENSMUST00000105632.7,ENSMUST00000129386.1,ENSMUST00000128297.7,ENSMUST00000070953.10,ENSMUST00000030931.10,ENSMUST00000148934.7	nonsense_mediated_decay,retained_intron,protein_coding	-0.182523	5.43863	0.000575277	0.0162015	Pantothenate Kinase 4 (Inactive)	This gene encodes a protein belonging to the pantothenate kinase family. Pantothenate kinase is a key regulatory enzyme in the biosynthesis of coenzyme A (CoA) in bacteria and mammalian cells. It catalyzes the first committed step in the universal biosynthetic pathway leading to CoA and is itself subject to regulation through feedback inhibition by CoA. This family member is most abundant in musc…		Metabolism	1.5	Fatty acid			Acetyl coA produciton
ENSMUSG00000025287	Acot9	ENSMUST00000126200.1,ENSMUST00000131332.7,ENSMUST00000026324.9,ENSMUST00000134662.1	nonsense_mediated_decay,processed_transcript,retained_intron,protein_coding	0.186917	5.31062	0.00203859	0.0385326	Acyl-CoA thioesterase 9, mitochondrial?	Acyl-CoA thioesterases are a group of enzymes that catalyze the hydrolysis of acyl-CoAs to the free fatty acid and coenzyme A (CoASH), providing the potential to regulate intracellular levels of acyl-CoAs, free fatty acids and CoASH (PubMed:16940157). Acyl-coenzyme A thioesterase 2/ACOT2 displays higher activity toward long chain acyl CoAs (C14-C20) (PubMed:16940157, PubMed:10944470). The enzyme …	https://link.springer.com/article/10.1007/s00018-013-1422-1	Metabolism	1.5	Fatty acid		High levels promote fatty acid oxidation	https://aasldpubs.onlinelibrary.wiley.com/doi/abs/10.1002/hep.31409
ENSMUSG00000020532	Acaca	ENSMUST00000137500.8,ENSMUST00000020843.12,ENSMUST00000133811.2,ENSMUST00000130012.8,ENSMUST00000183887.1,ENSMUST00000184534.1,ENSMUST00000183548.2,ENSMUST00000136463.8,ENSMUST00000103201.7	processed_transcript,retained_intron,protein_coding	0.19474	4.72308	0.000974746	0.0235048	Acetyl-CoA Carboxylase Alpha	Cytosolic enzyme that catalyzes the carboxylation of acetyl-CoA to malonyl-CoA, the first and rate-limiting step of de novo fatty acid biosynthesis. Malonyl-CoA is a highly regulated molecule in fatty acid synthesis; as such, it inhibits the rate-limiting step in beta-oxidation of fatty acids. Malonyl-CoA inhibits fatty acids from associating with carnitine by regulating the enzyme carnitine acyl…	https://pubmed.ncbi.nlm.nih.gov/29208696/	Metabolism	1.5	Fatty acid	inhibition	egulates migraton by shifting phospholipid composition, Cytoplasmic	Degrades acetyl coA, produce malonyl coA and prevent beta oxidation
ENSMUSG00000030861	Acadsb	ENSMUST00000156261.1,ENSMUST00000135633.8,ENSMUST00000133277.3,ENSMUST00000117518.1,ENSMUST00000015829.14,ENSMUST00000136612.2,ENSMUST00000151995.1	processed_transcript,retained_intron,protein_coding	0.200677	6.26678	0.000300485	0.0101427	Acyl-CoA Dehydrogenase Short/Branched Chain	Short/branched chain acyl-CoA dehydrogenase(ACADSB) is a member of the acyl-CoA dehydrogenase family of enzymes that catalyze the dehydrogenation of acyl-CoA derivatives in the metabolism of fatty acids or branch chained amino acids. Substrate specificity is the primary characteristic used to define members of this gene family. The ACADSB gene product has the greatest activity towards the short b…		Metabolism	1.5	Fatty acid		Mitochondria, fatty acid metabolism,	Mitochondria, fatty acid metabolism,
ENSMUSG00000007783	Cpt1c	ENSMUST00000212836.1,ENSMUST00000212217.1,ENSMUST00000212890.1,ENSMUST00000212255.1,ENSMUST00000211862.1,ENSMUST00000063761.7,ENSMUST00000211901.1	retained_intron,protein_coding	0.403319	3.0711	0.0006956	0.0186106	Carnitine Palmitoyltransferase 1C	Essential enzyme for b-oxidation of long chain fatty acids; The encoded protein regulates the beta-oxidation and transport of long-chain fatty acids into mitochondria, and may play a role in the regulation of feeding behavior and whole-body energy homeostasis. Loss of function causes angiogenesis deficits.	https://www.ncbi.nlm.nih.gov/pmc/articles/PMC4413024/ https://www.google.com/search?q=cpt1c&tbm=isch&ved=2ahUKEwjLppLiiP_pAhUZ9qwKHa5NB78Q2- https://pubmed.ncbi.nlm.nih.gov/29725060/cCegQIABAA&oq=Cpt1c&gs_lcp=CgNpbWcQARgAMgIIADIECAAQGDIECAAQGFDrxwJY68cCYM_QAmgAcAB4AIABOYgBOZIBATGYAQCgAQGqAQtnd3Mtd2l6LWltZw&sclient=img&ei=nuvkXsvfI5nsswWum534Cw&bih=920&biw=1920&rlz=1C1QJDB_enUS647US647#imgrc=pR7_D…	Metabolism	1.5	Fatty acid	Autophagy	Inhibited by manolys coA	ER located, autophagy, Mitochondria fatty acid metabolism
ENSMUSG00000061740	Cyp2d22	ENSMUST00000023083.7	protein_coding	-0.536643	7.57138	1.27634e-06	0.000225861	Cytochrome P450 Family 2 Subfamily D Member 6	This gene encodes a member of the cytochrome P450 superfamily of enzymes. The cytochrome P450 proteins are monooxygenases which catalyze many reactions involved in drug metabolism and synthesis of cholesterol, steroids and other lipids. This protein localizes to the endoplasmic reticulum and is known to metabolize as many as 25% of commonly prescribed drugs. Its substrates include antidepressants…		Metabolism	1.5	Fatty acid
ENSMUSG00000036833	Pnpla7	ENSMUST00000141584.1,ENSMUST00000139643.7,ENSMUST00000153618.7,ENSMUST00000045295.13,ENSMUST00000138536.1,ENSMUST00000154359.1,ENSMUST00000152777.1,ENSMUST00000146153.1,ENSMUST00000132082.7,ENSMUST00000155601.1,ENSMUST00000137913.7,ENSMUST00000139031.1,ENSMUST00000142139.1,ENSMUST00000128517.1,ENSMUST00000145508.1	nonsense_mediated_decay,processed_transcript,retained_intron,protein_coding	-0.477604	6.39329	5.56276e-07	0.000138908	Patatin Like Phospholipase Domain Containing 7	Human patatin-like phospholipases, such as PNPLA7, have been implicated in regulation of adipocyte differentiation and have been induced by metabolic stimuli (Wilson et al., 2006 [PubMed 16799181]).[supplied by OMIM, Jun 2008]	https://www.jbc.org/content/early/2017/09/07/jbc.M117.792978	Metabolism	1.5	Fatty acid	Lipid droplet	Interacts with lipid droplets (see link)	Lipid metabolism, lysophospholipase , LPC, interacts with ER and lipid droplets
ENSMUSG00000003123	Lipe	ENSMUST00000054301.13,ENSMUST00000206588.1,ENSMUST00000003207.10,ENSMUST00000205698.1,ENSMUST00000105177.2,ENSMUST00000205923.1,ENSMUST00000206861.1,ENSMUST00000149349.1	nonsense_mediated_decay,retained_intron,protein_coding	-0.380455	5.90438	2.77076e-07	9.68185e-05	Lipase E, Hormone Sensitive Type	The protein encoded by this gene has a long and a short form, generated by use of alternative translational start codons. The long form is expressed in steroidogenic tissues such as testis, where it converts cholesteryl esters to free cholesterol for steroid hormone production. The short form is expressed in adipose tissue, among others, where it hydrolyzes stored triglycerides to free fatty acid…		Metabolism	1.5	Fatty acid	Cholesterol		Cholesterol and free fatty acid production
ENSMUSG00000064141	Zfp69	ENSMUST00000106280.7,ENSMUST00000132839.1,ENSMUST00000130702.1,ENSMUST00000106281.2	retained_intron,protein_coding	-0.210901	5.37814	0.000613682	0.0168605	ZFP69 Zinc Finger Protein	Putative transcription factor that appears to regulate lipid metabolism.	https://pubmed.ncbi.nlm.nih.gov/20865367/?from_term=Zfp69&from_pos=4 https://pubmed.ncbi.nlm.nih.gov/26232096/?from_term=Zfp69&from_pos=1	Metabolism	1.5	Fatty acid			Plays a role in lipids and glucose metabolism, hippo signaling
ENSMUSG00000038671	Arfrp1	ENSMUST00000145358.1,ENSMUST00000139368.7,ENSMUST00000183499.1,ENSMUST00000108808.7,ENSMUST00000127988.7,ENSMUST00000048269.11,ENSMUST00000170190.7,ENSMUST00000184859.1,ENSMUST00000152334.1,ENSMUST00000130346.7,ENSMUST00000152580.7,ENSMUST00000185118.7	nonsense_mediated_decay,processed_transcript,retained_intron,protein_coding	-0.195722	4.78907	0.00105893	0.0246105	ADP Ribosylation Factor Related Protein 1	The protein encoded by this gene is a membrane-associated GTP-ase which localizes to the plasma membrane and is related to the ADP-ribosylation factor (ARF) and ARF-like (ARL) proteins. This gene plays a role in membrane trafficking between the trans-Golgi network and endosomes.Trans-Golgi-associated GTPase that regulates protein sorting. Controls the targeting of ARL1 and its effector to the tra…	https://pubmed.ncbi.nlm.nih.gov/22505585-the-gtpase-arfrp1-controls-the-lipidation-of-chylomicrons-in-the-golgi-of-the-intestinal-epithelium/ https://mcb.asm.org/content/30/5/1231 https://mcb.asm.org/content/30/5/1231 https://www.ncbi.nlm.nih.gov/pubmed/22505585	Metabolism	1.5	Fatty acid	Lipid droplet	This gene plays a role in membrane trafficking between the trans-Golgi network and endosomes. Lipid driplet formation and lipolysis	Lipid droplets, lipid trafficking, LDL formation
ENSMUSG00000027698	Nceh1	ENSMUST00000129412.7,ENSMUST00000140872.1,ENSMUST00000138947.7,ENSMUST00000046515.14,ENSMUST00000091284.4	nonsense_mediated_decay,processed_transcript,retained_intron,protein_coding	-0.173089	5.52763	0.00263694	0.0460113	Neutral Cholesterol Ester Hydrolase 1	Hydrolyzes 2-acetyl monoalkylglycerol ether, the penultimate precursor of the pathway for de novo synthesis of platelet-activating factor. May be responsible for cholesterol ester hydrolysis in macrophages, thereby contributing to the development of atherosclerosis. Also involved in organ detoxification by hydrolyzing exogenous organophosphorus compounds. May contribute to cancer pathogenesis by …	https://pubmed.ncbi.nlm.nih.gov/24891333/ https://pubmed.ncbi.nlm.nih.gov/25280398/	Metabolism	1.5	Fatty acid	Cholesterol	pioglitazone increased ABCA1 expression in an LXR-dependent manner and NCEH1 expression in an LXRα-independent manner, which mobilized CE hydrolysis and cholesterol efflux to reduce lipid droplet content in cholesterolosis GBECs.	Cholesterol metabolism (degradation), lipid droplet foramtion, PPAR regulated
ENSMUSG00000004565	Pnpla6	ENSMUST00000207430.1,ENSMUST00000208914.1,ENSMUST00000208002.1,ENSMUST00000207424.1,ENSMUST00000004681.13,ENSMUST00000207336.1,ENSMUST00000208310.1,ENSMUST00000208370.1,ENSMUST00000207929.1,ENSMUST00000207146.1,ENSMUST00000208315.1,ENSMUST00000207317.1,ENSMUST00000207421.1,ENSMUST00000208851.1,ENSMUST00000208762.1,ENSMUST00000208691.1,ENSMUST00000207299.1,ENSMUST00000208006.1,ENSMUST00000207941.1…	processed_transcript,retained_intron,protein_coding	-0.167264	7.37616	0.00218164	0.0404874	Patatin Like Phospholipase Domain Containing 6, Neuropathy Target Esterase	This gene encodes a phospholipase that deacetylates intracellular phosphatidylcholine to produce glycerophosphocholine. It is thought to function in neurite outgrowth and process elongation during neuronal differentiation. The protein is anchored to the cytoplasmic face of the endoplasmic reticulum in both neurons and non-neuronal cells. Mutations in this gene result in autosomal recessive spasti…	https://pubmed.ncbi.nlm.nih.gov/31835418/	Metabolism	1.5	Fatty acid	Lipid droplet	n the current study we show that the C-terminal region of NTE forms a catalytically active domain that exhibits high affinity for lipid droplets (LDs), cellular storage organelles for triacylglycerol (TAG), which have been recently implicated in the progression of neurodegenerative diseases. Ectopic expression of the C domain in cultured cells decreases cellular PC, elevates TAG and induces LD cl…	lipid droplets, lipiod processing, vesclice membranes
ENSMUSG00000024773	Atg2a	ENSMUST00000045351.12,ENSMUST00000143053.1,ENSMUST00000145600.1,ENSMUST00000151079.1,ENSMUST00000135018.1	retained_intron,protein_coding	-0.165562	6.58855	0.000732796	0.019418	Autophagy Related 2A	ATG2A (Autophagy Related 2A) is a Protein Coding gene. Diseases associated with ATG2A include Auditory Agnosia and Neurodegeneration With Brain Iron Accumulation 5. Among its related pathways are Autophagy - animal and Autophagy Pathway.Involved in autophagosome assembly, regulating the size of nascent autophagosomes (PubMed:28561066). Also regulates lipid droplets morphology and distribution wit…	https://www.ncbi.nlm.nih.gov/pmc/articles/PMC4076084/	Metabolism	1.5	Fatty acid	Lipid droplet	Autophagosomes, loss of this gene leads to enlarged lipid droplets. ATG2A is a lipid transfer protein. ATG2A can extract lipids from membrane vesicles and unload them to other vesicles.	Lipid droplets, autophagosomes, lipid transfer
ENSMUSG00000039100	MARCH6	ENSMUST00000090227.4	protein_coding	-0.154843	6.94989	0.000759113	0.0198316	Membrane Associated Ring-CH-Type Finger 6	E3 ubiquitin-protein ligase that promotes 'Lys-48'-linked ubiquitination of target proteins, leading to their proteasomal degradation (PubMed:15673284). Promotes ubiquitination of DIO2, leading to its degradation (PubMed:19651899). Promotes ubiquitination of SQLE, leading to its degradation (PubMed:24449766). E3 ubiquitin ligases accept ubiquitin from an E2 ubiquitin-conjugating enzyme in the for…	https://pubmed.ncbi.nlm.nih.gov/31904814/?from_term=March6&from_sort=pubdate&from_pos=2	Metabolism	1.5	Fatty acid	Cholesterol		Ubiquitination, proteosome, cholesterol synthesis
ENSMUSG00000026600	Soat1	ENSMUST00000051396.12,ENSMUST00000188027.1,ENSMUST00000191379.6,ENSMUST00000187987.1,ENSMUST00000187073.1,ENSMUST00000186420.1,ENSMUST00000189661.6,ENSMUST00000187507.6	retained_intron,protein_coding	0.226833	4.64527	0.00295386	0.0495781	Sterol O-Acyltransferase 1, ACAT1	The protein encoded by this gene belongs to the acyltransferase family. It is located in the endoplasmic reticulum, and catalyzes the formation of fatty acid-cholesterol esters. This gene has been implicated in the formation of beta-amyloid and atherosclerotic plaques by controlling the equilibrium between free cholesterol and cytoplasmic cholesteryl esters. Alternatively spliced transcript varia…	https://pubmed.ncbi.nlm.nih.gov/29567472/	Metabolism	1.5	Fatty acid	Produce cholesterol esters lipid droplets		ER, catalyzes the formation of fatty acid-cholesterol esters, heme oxygenase, inflamamtion, lipoprotein processing, artherosclerosis
ENSMUSG00000025203	Scd2	ENSMUST00000026221.5	protein_coding	0.274698	7.13359	1.95871e-08	1.91391e-05	Stearoyl-CoA Desaturase 5	Stearoyl-CoA desaturase (SCD; EC 1.14.99.5) is an integral membrane protein of the endoplasmic reticulum that catalyzes the formation of monounsaturated fatty acids from saturated fatty acids. SCD may be a key regulator of energy metabolism with a role in obesity and dislipidemia. Four SCD isoforms, Scd1 through Scd4, have been identified in mouse. In contrast, only 2 SCD isoforms, SCD1 (MIM 6040…		Metabolism	1.5	Fatty acid	MUFA, ER		ER, formation of monounsaturated fatty acids from saturated fatty acids
ENSMUSG00000023963	Cyp39a1	ENSMUST00000170988.1	protein_coding	0.37696	3.59876	0.000253106	0.00901999	Cytochrome P450 Family 39 Subfamily A Member 1	This gene encodes a member of the cytochrome P450 superfamily of enzymes. The cytochrome P450 proteins are monooxygenases which catalyze many reactions involved in drug metabolism and synthesis of cholesterol, steroids and other lipids. This endoplasmic reticulum protein is involved in the conversion of cholesterol to bile acids. Its substrates include the oxysterols 25-hydroxycholesterol, 27-hyd…	https://www.mdpi.com/1422-0067/21/9/3309/htm	Metabolism	1.5	Fatty acid	degradation	Remove excess cholesterol form brain	cholesterol metabolism, ROR activity
ENSMUSG00000024665	Fads2	ENSMUST00000025567.7	protein_coding	0.428356	4.55957	0.00045671	0.0137773	Fatty Acid Desaturase 2, Acyl-CoA 6-Desaturase	The protein encoded by this gene is a member of the fatty acid desaturase (FADS) gene family. Desaturase enzymes regulate unsaturation of fatty acids through the introduction of double bonds between defined carbons of the fatty acyl chain. FADS family members are considered fusion products composed of an N-terminal cytochrome b5-like domain and a C-terminal multiple membrane-spanning desaturase p…		Metabolism	1.5	Fatty acid		Desaturates palmitate to produce the mono-unsaturated fatty acid sapienate	Production of HUFA,
ENSMUSG00000028497	Hacd4	ENSMUST00000030221.2,ENSMUST00000132493.7,ENSMUST00000151280.7	protein_coding	0.461532	5.46779	2.76935e-06	0.000384187	3-Hydroxyacyl-CoA Dehydratase 4	Catalyzes the third of the four reactions of the long-chain fatty acids elongation cycle. This endoplasmic reticulum-bound enzymatic process, allows the addition of two carbons to the chain of long- and very long-chain fatty acids/VLCFAs per cycle. This enzyme catalyzes the dehydration of the 3-hydroxyacyl-CoA intermediate into trans-2,3-enoyl-CoA, within each cycle of fatty acid elongation. Ther…		Metabolism	1.5	Fatty acid			Production of long chain fatty acids, endoplasmic reticulum
ENSMUSG00000037071	Scd1	ENSMUST00000041331.2	protein_coding	0.607276	2.89613	6.15987e-06	0.000668777	Stearoyl-CoA Desaturase	This gene encodes an enzyme involved in fatty acid biosynthesis, primarily the synthesis of oleic acid. The protein belongs to the fatty acid desaturase family and is an integral membrane protein located in the endoplasmic reticulum. Transcripts of approximately 3.9 and 5.2 kb, differing only by alternative polyadenlyation signals, have been detected. A gene encoding a similar enzyme is located o…	https://academic.oup.com/advances/article/2/1/15/4591637 https://www.researchgate.net/publication/259112110_Opportunities_and_Challenges_in_Developing_Stearoyl-Coenzyme_A_Desaturase- https://journals.plos.org/plosone/article?id=10.1371/journal.pone.00332831_Inhibitors_as_Novel_Therapeutics_for_Human_Disease/figures?lo=1	Metabolism	1.5	Fatty acid	MUFA, ER		Endoplasmic reticulum, Produce MUFA (oleic acid), high levels linked to insulin reistance, mitochondrial function, LXR
ENSMUSG00000022180	Slc7a8	ENSMUST00000022787.6	protein_coding	-0.644444	4.92037	5.66128e-07	0.000139815	LAT2	Sodium-independent, high-affinity transport of small and large neutral amino acids such as alanine, serine, threonine, cysteine, phenylalanine, tyrosine, leucine, arginine and tryptophan, when associated with SLC3A2/4F2hc. Acts as an amino acid exchanger. Has higher affinity for L-phenylalanine than LAT1 but lower affinity for glutamine and serine. L-alanine is transported at physiological concen…		Metabolism	1.6	Amino acid	Uptake	Amino acid uptake, and then delivery to brain	Essential amino acid uptake
ENSMUSG00000024903	Lao1	ENSMUST00000058651.4,ENSMUST00000142457.1	processed_transcript,protein_coding	-0.618336	3.8335	4.14054e-05	0.0024488	L-amino acid oxidase catalytic subunit	As suggested by the name of the family, LAAOs are flavoenzymes which function to catalyze the stereospecific oxidative deamination of an L-amino acid.[4] The three substrates of the enzymatic reaction are an L-amino acid, water, and oxygen, whereas the three products are the corresponding α-keto acid (2-oxo acid), ammonia, and hydrogen peroxide. One example of the enzyme in action occurs with the…	https://www.sciencedirect.com/topics/neuroscience/phenylalanine	Metabolism	1.6	Amino acid	henlyalanine pyruvate kinase	KO resulted in high phenylalanine and low pyruvate kinase	L amino acid oxidation
ENSMUSG00000021260	Hhipl1	ENSMUST00000021685.6	protein_coding	-0.50259	5.20636	6.98038e-07	0.000156877	HHIP Like 1	This gene encodes a protein that belongs to the glucose/sorbosone dehydrogenase family. The encoded protein also contains a domain that binds folate and reduced folic acid derivatives. [provided by RefSeq, Jul 2016]	https://www.ahajournals.org/doi/full/10.1161/CIRCULATIONAHA.119.041059	Metabolism	1.6	Amino acid	Methione folate glutathione	Involved in shh signaling and proliferation	shh signaling, folate
ENSMUSG00000040010	Slc7a5	ENSMUST00000045557.9,ENSMUST00000182165.1,ENSMUST00000183015.1	processed_transcript,retained_intron,protein_coding	-0.481239	9.50558	2.40982e-05	0.00171697	Large neutral amino acids Cationic Amino Acid Transporter, Y+ System, LAT1	The heterodimer with SLC3A2 functions as sodium-independent, high-affinity transporter that mediates uptake of large neutral amino acids such as phenylalanine, tyrosine, L-DOPA, leucine, histidine, methionine and tryptophan (PubMed:9751058, PubMed:10049700, PubMed:11557028, PubMed:10391915, PubMed:10574970, PubMed:11311135, PubMed:11564694, PubMed:12117417, PubMed:12225859, PubMed:25998567, PubMe…		Metabolism	1.6	Amino acid	Uptake	Loss of LAT1, lower angiogenesis	Essential amino acid uptake, LAT1
ENSMUSG00000010095	Slc3a2	ENSMUST00000010239.5,ENSMUST00000206895.1,ENSMUST00000205538.1,ENSMUST00000205377.1,ENSMUST00000170157.7,ENSMUST00000206598.1,ENSMUST00000205463.1,ENSMUST00000206797.1,ENSMUST00000206560.1	retained_intron,protein_coding	-0.306869	8.67648	1.7665e-05	0.00137848	Solute Carrier Family 3 Member 2	Component of several heterodimeric amino acid transporter complexes (PubMed:11557028, PubMed:9829974, PubMed:9751058, PubMed:10391915, PubMed:10574970, PubMed:11311135). The precise substrate specificity depends on the other subunit in the heterodimer (PubMed:9829974, PubMed:9751058, PubMed:10391915, PubMed:10574970, PubMed:30867591, PubMed:10903140). The heterodimer with SLC3A2 functions as sodi…	https://www.ncbi.nlm.nih.gov/pmc/articles/PMC5954993/	Metabolism	1.6	Amino acid	Uptake	Important for binding as a cotransporter to LAT1 and LAT2. Also interacts with inegrin signaling and promotes angiogenesis	Amino acid, LAT1, LAT2, nitric oxide production
ENSMUSG00000021238	Aldh6a1	ENSMUST00000085192.5	protein_coding	-0.270208	5.03278	3.11003e-05	0.00200847	Aldehyde Dehydrogenase 6 Family Member A1	This gene encodes a member of the aldehyde dehydrogenase protein family. The encoded protein is a mitochondrial methylmalonate semialdehyde dehydrogenase that plays a role in the valine and pyrimidine catabolic pathways. This protein catalyzes the irreversible oxidative decarboxylation of malonate and methylmalonate semialdehydes to acetyl- and propionyl-CoA. Methylmalonate semialdehyde dehydroge…	https://www.ncbi.nlm.nih.gov/pmc/articles/PMC3631350/	Metabolism	1.6	Amino acid	Valine metabolism		Mitochondria, valine, pyrimidine metabolism, malonate, uric acid
ENSMUSG00000025212	Sfxn3	ENSMUST00000084493.6,ENSMUST00000111954.10,ENSMUST00000062213.11	protein_coding	-0.230664	6.66609	0.000297396	0.0100962	Sideroflexin 3	Mitochondrial serine transporter that mediates transport of serine into mitochondria, an important step of the one-carbon metabolism pathway (PubMed:30442778). Mitochondrial serine is converted to glycine and formate, which then exits to the cytosol where it is used to generate the charged folates that serve as one-carbon donors (PubMed:30442778).		Metabolism	1.6	Amino acid	Methione folate glutathione		Mitochondria serine transporter, folate metabolism, ROS
ENSMUSG00000024423	Impact	ENSMUST00000025290.5	protein_coding	-0.222599	4.42682	0.00228279	0.0418121	Impact RWD Domain Protein	ranslational regulator that ensures constant high levels of translation upon a variety of stress conditions, such as amino acid starvation, UV-C irradiation, proteasome inhibitor treatment and glucose deprivation. Plays a role as a negative regulator of the EIF2AK4/GCN2 kinase activity; impairs GCN1-mediated EIF2AK4/GCN2 activation, and hence EIF2AK4/GCN2-mediated eIF-2-alpha phosphorylation and …		Metabolism	1.6	Amino acid	sensing - autophagy	Inhibits GCN2 which promotes amino acid	prevent protein synthesis in glucose starvation and low amino acids
ENSMUSG00000053907	Mat2a	ENSMUST00000206783.1,ENSMUST00000206692.1,ENSMUST00000059472.9,ENSMUST00000205384.1,ENSMUST00000206962.1,ENSMUST00000205823.1,ENSMUST00000205335.1,ENSMUST00000206368.1,ENSMUST00000206904.1,ENSMUST00000206900.1	nonsense_mediated_decay,processed_transcript,retained_intron,protein_coding	-0.222367	8.1334	0.000759767	0.0198316	Methionine Adenosyltransferase 2A	catalyzes the production of S-adenosylmethionine (AdoMet) from methionine and ATP.	https://www.ncbi.nlm.nih.gov/pmc/articles/PMC3650394/ https://www.nature.com/articles/s41568-019-0187-8	Metabolism	1.6	Amino acid	Methione folate glutathione	Methionine metabolism, key for glutathione modulation, folate cycle may be reflective of NO	Methionine metabolism, key for glutathione modulation, folate cycle,NO, homocycteine
ENSMUSG00000022186	Oxct1	ENSMUST00000138927.1,ENSMUST00000133130.1,ENSMUST00000131240.1,ENSMUST00000124591.7,ENSMUST00000110690.8	processed_transcript,protein_coding	0.195003	6.38983	0.0018695	0.0365866	3-Oxoacid CoA-Transferase 1, Succinyl-CoA:3-Ketoacid Coenzyme A Transferase 1, Mitochondrial	This gene encodes a member of the 3-oxoacid CoA-transferase gene family. The encoded protein is a homodimeric mitochondrial matrix enzyme that plays a central role in extrahepatic ketone body catabolism by catalyzing the reversible transfer of coenzyme A from succinyl-CoA to acetoacetate. Mutations in this gene are associated with succinyl CoA:3-oxoacid CoA transferase deficiency. [provided by Re…	https://pubmed.ncbi.nlm.nih.gov/28178565/ https://pubmed.ncbi.nlm.nih.gov/11569918/	Metabolism	1.6	Amino acid		Ketogenesis in healthy individuals is ultimately under the control of the master regulatory protein AMPK, which is activated during times of metabolic stress, such as carbohydrate insufficiencyThe production of ketone bodies is then initiated to make available energy that is stored as fatty acids. Fatty acids are enzymatically broken down in β-oxidation to form acetyl-CoA. Under normal conditions…	ketone body metabolism, mitochondria
ENSMUSG00000025283	Sat1	ENSMUST00000123337.1,ENSMUST00000150046.1,ENSMUST00000134855.7,ENSMUST00000026318.14,ENSMUST00000138944.7,ENSMUST00000152463.7,ENSMUST00000112551.3	nonsense_mediated_decay,retained_intron,protein_coding	0.253016	7.59781	3.76926e-06	0.00047982	Spermidine/Spermine N1-Acetyltransferase 1	The protein encoded by this gene belongs to the acetyltransferase family, and is a rate-limiting enzyme in the catabolic pathway of polyamine metabolism. It catalyzes the acetylation of spermidine and spermine, and is involved in the regulation of the intracellular concentration of polyamines and their transport out of cells. Defects in this gene are associated with keratosis follicularis spinulo…	https://www.ncbi.nlm.nih.gov/pmc/articles/PMC2753421/	Metabolism	1.6	Amino acid	Polyamine metabolism	Polyamine metabolism is involved in a lot of things from ion channel regulation, cytoskeletal, signaling	Polyamine metabolism, spermidine,
ENSMUSG00000021707	Dhfr	ENSMUST00000022218.4	protein_coding	0.29675	4.23543	0.00285054	0.0486008	Dihydrofolate Reductase	Key enzyme in folate metabolism. Contributes to the de novo mitochondrial thymidylate biosynthesis pathway. Catalyzes an essential reaction for de novo glycine and purine synthesis, and for DNA precursor synthesis. Binds its own mRNA and that of DHFR2.		Metabolism	1.6	Amino acid	Methione folate glutathione		Floate metabolism, DNA synthesis in cell and mitochondria
ENSMUSG00000030934	Oat	ENSMUST00000211545.1,ENSMUST00000084500.7	protein_coding	0.311318	4.66549	0.000216325	0.00799674	Ornithine Aminotransferase,Ornithine Aminotransferase, Mitochondrial	This gene encodes the mitochondrial enzyme ornithine aminotransferase, which is a key enzyme in the pathway that converts arginine and ornithine into the major excitatory and inhibitory neurotransmitters glutamate and GABA. Mutations that result in a deficiency of this enzyme cause the autosomal recessive eye disease Gyrate Atrophy. Alternatively spliced transcript variants encoding different iso…	https://pubmed.ncbi.nlm.nih.gov/16371440/#:~:text=In%20cerebral%20endothelial%20cells%2C%20glutamate,DNA%20fragmentation%2C%20and%20cell%20detachment.	Metabolism	1.6	Amino acid		This will shift ornithine towards glutamate metabolism rather than citrulline - arginine	Mitochondria, glutamate production, ornithine metabolism,
ENSMUSG00000027597	Ahcy	ENSMUST00000146367.1,ENSMUST00000054607.15,ENSMUST00000137242.1	retained_intron,protein_coding	0.314676	3.38785	0.00175315	0.0350224	Adenosylhomocysteinase	S-adenosylhomocysteine hydrolase belongs to the adenosylhomocysteinase family. It catalyzes the reversible hydrolysis of S-adenosylhomocysteine (AdoHcy) to adenosine (Ado) and L-homocysteine (Hcy). Thus, it regulates the intracellular S-adenosylhomocysteine (SAH) concentration thought to be important for transmethylation reactions. Deficiency in this protein is one of the different causes of hype…	https://en.wikipedia.org/wiki/Homocysteine https://www.ncbi.nlm.nih.gov/pubmed/25005183 https://www.ncbi.nlm.nih.gov/pmc/articles/PMC2873778/	Metabolism	1.6	Amino acid	Methione folate glutathione	Homomcycteine is detrimental for endothelial cell function; nitric oxide inhibition, prostanoids, hypertension, endothelin 1 and ROS, released from methiponine cycle In contrast, folate and B12 deficiencies result in low methionine and SAM and in high homocysteine, because they inhibit the regeneration of methionine from homocysteine	Homocysteine, GSH/GSSG production, NO, prostaglandin, inflammation, methionine metabolism
ENSMUSG00000027709	Mccc1	ENSMUST00000200163.1,ENSMUST00000198515.4,ENSMUST00000029259.9,ENSMUST00000200162.1,ENSMUST00000199113.4,ENSMUST00000197580.1,ENSMUST00000200552.1,ENSMUST00000199092.1	nonsense_mediated_decay,retained_intron,protein_coding	-0.27024	3.86049	0.00149575	0.0313285	Methylcrotonoyl-CoA Carboxylase 1	This gene encodes the large subunit of 3-methylcrotonyl-CoA carboxylase. This enzyme functions as a heterodimer and catalyzes the carboxylation of 3-methylcrotonyl-CoA to form 3-methylglutaconyl-CoA. Mutations in this gene are associated with 3-Methylcrotonylglycinuria, an autosomal recessive disorder of leucine catabolism. [provided by RefSeq, Jul 2008]Biotin-attachment subunit of the 3-methylcr…	https://pubmed.ncbi.nlm.nih.gov/26255285/	Metabolism	1.6	Amino acid	Leucine	Leu increases protein synthesis through activation of the mammalian target of rapamycin (mTOR) signaling pathway in skeletal muscle, adipose tissue and placental cells. Leu promotes energy metabolism (glucose uptake, mitochondrial biogenesis, and fatty acid oxidation) to provide energy for protein synthesis, while inhibiting protein degradation.	Mitochondria enzyme, leucine metabolism, mTOR, promtes energy utilization
ENSMUSG00000020424	Gatsl3	ENSMUST00000020699.3	protein_coding	-0.2248	5.63434	0.00110649	0.0254004	Cytosolic Arginine Sensor For MTORC1 Subunit 1, CASTOR1	Functions as an intracellular arginine sensor within the amino acid-sensing branch of the TORC1 signaling pathway. As a homodimer or a heterodimer with CASTOR2, binds and inhibits the GATOR subcomplex GATOR2 and thereby mTORC1. Binding of arginine to CASTOR1 allosterically disrupts the interaction of CASTOR1-containing dimers with GATOR2 which can in turn activate mTORC1 and the TORC1 signaling p…		Metabolism	1.6	Amino acid	mtor		mTOR, amino acid, arginine sensor
ENSMUSG00000026185	Igfbp5	ENSMUST00000027377.8,ENSMUST00000137339.1	processed_transcript,protein_coding	-1.03399	3.58366	7.73998e-08	4.04531e-05	Insulin Like Growth Factor Binding Protein 5	Canonical - bind insulin like GF and sustain siganling, also non-canonical involced in replicaiton	https://www.ncbi.nlm.nih.gov/pmc/articles/PMC5826077/ https://jcs.biologists.org/content/125/7/1693	Metabolism	1.7	Glucose	Insulin like growth factor	This would result in lowe IGF and therefore receptor signaling. https://jme.bioscientifica.com/view/journals/jme/54/1/R1.xml	Glucose metabolism, proliferation, insulin like growth factor, amino acid uptake!
ENSMUSG00000032648	Pygm	ENSMUST00000113483.1,ENSMUST00000139775.1,ENSMUST00000035269.14,ENSMUST00000142755.1	retained_intron,protein_coding	-0.735411	1.4635	2.459e-05	0.00173785	Glycogen Phosphorylase, Muscle Associated	This gene encodes a muscle enzyme involved in glycogenolysis. Highly similar enzymes encoded by different genes are found in liver and brain. Mutations in this gene are associated with McArdle disease (myophosphorylase deficiency), a glycogen storage disease of muscle. Alternative splicing results in multiple transcript variants.[provided by RefSeq, Sep 2009]	https://www.ncbi.nlm.nih.gov/pmc/articles/PMC4171726/	Metabolism	1.7	Glucose	glycogenolysis		Break down of glycogen stores
ENSMUSG00000031734	Irx3	ENSMUST00000175795.3,ENSMUST00000093312.5	protein_coding	-0.724461	3.33511	4.59699e-05	0.00260891	Iroquois Homeobox 3	IRX3 is a member of the Iroquois homeobox gene family (see IRX1; MIM 606197) and plays a role in an early step of neural development (Bellefroid et al., 1998 [PubMed 9427753]). Members of this family appear to play multiple roles during pattern formation of vertebrate embryos (Lewis et al., 1999 [PubMed 10370142]).[supplied by OMIM, Aug 2009]Transcription factor involved in SHH-dependent neural p…	https://www.researchgate.net/publication/269712878_The_Proangiogenic_Effect_of_Iroquois_Homeobox_Transcription_Factor_Irx3_in_Human_Microvascular_Endothelial_Cells https://pubmed.ncbi.nlm.nih.gov/30127222/?from_term=Iroquois+Homeobox+3&from_pos=1	Metabolism	1.7	Glucose		Promotes angiogenesis (VEGF)/migration,	Transcription factor, angiogenesis, lipid metabolism, shh signaling
ENSMUSG00000017493	Igfbp4	ENSMUST00000017637.12,ENSMUST00000177105.1,ENSMUST00000140772.1,ENSMUST00000177092.7,ENSMUST00000130530.7,ENSMUST00000123946.1	processed_transcript,protein_coding	-0.385449	7.09899	4.50957e-06	0.000521933	Insulin Like Growth Factor Binding Protein 4	This gene is a member of the insulin-like growth factor binding protein (IGFBP) family and encodes a protein with an IGFBP domain and a thyroglobulin type-I domain. The protein binds both insulin-like growth factors (IGFs) I and II and circulates in the plasma in both glycosylated and non-glycosylated forms. Binding of this protein prolongs the half-life of the IGFs and alters their interaction w…		Metabolism	1.7	Glucose		Prolongs IGF activity	Insulin-like growth factor, endothelial cell survival, ROS protection, mitochondrial function
ENSMUSG00000029714	Gigyf1	ENSMUST00000031727.9,ENSMUST00000197624.4	protein_coding	-0.375054	6.37336	5.62235e-08	3.32517e-05	GRB10 Interacting GYF Protein 1	This gene encodes a member of the gyf family of adaptor proteins. The encoded protein contains a gyf protein interaction domain. It binds growth factor receptor bound 10, another adaptor protein that binds activated insulin-like growth factor 1 and insulin receptors and regulates receptor signaling. [provided by RefSeq, Apr 2017]		Metabolism	1.7	Glucose			Insulin signaling, grb10 is a positive regulator of VEGF signaling
ENSMUSG00000079020	Slc45a4	ENSMUST00000132607.1,ENSMUST00000152558.1,ENSMUST00000144936.7,ENSMUST00000076224.11,ENSMUST00000150409.1,ENSMUST00000130765.1,ENSMUST00000054266.12,ENSMUST00000151288.7	processed_transcript,protein_coding	-0.349899	7.29431	0.000143019	0.00605397	Solute Carrier Family 45 Member 4	(i) transport a disaccharide,sucrose, as well simple sugars such as glucose and fructose (ii) perform secondary active transport in a proton-dependent manne		Metabolism	1.7	Glucose	sugar	Glucose transport	Glucose transport
ENSMUSG00000003134	Tbc1d8	ENSMUST00000195854.1,ENSMUST00000192099.1,ENSMUST00000193823.1,ENSMUST00000192531.5,ENSMUST00000054462.10	nonsense_mediated_decay,retained_intron,protein_coding	-0.348084	6.6285	1.62047e-05	0.00131474	TBC1 Domain Family Member 8; Vascular Rab-GAP/TBC-Containing Protein	TBC1D8 is a member of the Tre2/Bub2/Cdc16 (TBC) domain protein family, which is characterized by the presence of highly conserved TBC domains, and members of this family act as negative regulators of Rab proteins to facilitate Rab inactivation TBC1D8 (TBC1 Domain Family Member 8) is a Protein Coding gene. Among its related pathways are Cell cycle. Gene Ontology (GO) annotations related to this ge…	https://pubmed.ncbi.nlm.nih.gov/30809301/	Metabolism	1.7	Glucose	Glycolysis	In this study, we describe the role of TBC1D8 as a negative regulator of PKM2 tetramerization to regulate metabolic reprogramming in a GAP activity-independent manner. TBC1D8 is amplificated and up-regulated in OVCA and is significantly associated with a poor prognosis in OVCA patients. TBC1D8 promotes OVCA tumorigenesis in vitro and in vivo in a GAP activity-independent manner. The Rab-GAP TBC d…	Rab inactivation, promotes aerobic glycolysis
ENSMUSG00000019139	Isyna1	ENSMUST00000209751.1,ENSMUST00000211117.1,ENSMUST00000019283.9,ENSMUST00000211773.1,ENSMUST00000210005.1,ENSMUST00000211501.1,ENSMUST00000210358.1,ENSMUST00000210878.1,ENSMUST00000209285.1	nonsense_mediated_decay,retained_intron,protein_coding	-0.313427	5.04992	0.000428711	0.0131444	Inositol-3-Phosphate Synthase 1	This gene encodes an inositol-3-phosphate synthase enzyme. The encoded protein plays a critical role in the myo-inositol biosynthesis pathway by catalyzing the rate-limiting conversion of glucose 6-phosphate to myoinositol 1-phosphate. Alternatively spliced transcript variants encoding multiple isoforms have been observed for this gene, and a pseudogene of this gene is located on the short arm of…	https://www.mdpi.com/1422-0067/18/10/2187	Metabolism	1.7	Glucose	inositol	).
ENSMUSG00000004328	Hif3a	ENSMUST00000153833.1,ENSMUST00000037762.10,ENSMUST00000139224.2,ENSMUST00000108492.8	protein_coding	-0.268729	7.02739	0.00190515	0.0369745	Hypoxia Inducible Factor 3 Subunit Alpha	The protein encoded by this gene is the alpha-3 subunit of one of several alpha/beta-subunit heterodimeric transcription factors that regulate many adaptive responses to low oxygen tension (hypoxia). The alpha-3 subunit lacks the transactivation domain found in factors containing either the alpha-1 or alpha-2 subunits. It is thought that factors containing the alpha-3 subunit are negative regulat…		Metabolism	1.7	Glucose	metabolism		Repress HIF1, suppress angiognesis, hypoxia
ENSMUSG00000038145	Snrk	ENSMUST00000145384.1,ENSMUST00000139181.1,ENSMUST00000118886.8,ENSMUST00000119215.8,ENSMUST00000217631.1,ENSMUST00000146832.7,ENSMUST00000120173.8,ENSMUST00000215432.1,ENSMUST00000142784.1,ENSMUST00000151872.1,ENSMUST00000134949.7,ENSMUST00000131169.1	processed_transcript,retained_intron,protein_coding	-0.24418	9.59682	0.000147539	0.00617465	Sucrose Nonfermenting 1-Related Kinase	Snf1 (sucrose nonfermenting 1)-related kinase (SNRK) is a serine/threonine kinase and a novel member of the AMPK (adenosine monophosphate-activated protein kinase)-related superfamily	https://www.ahajournals.org/doi/10.1161/ATVBAHA.117.309834	Metabolism	1.7	Glucose	general	This is simialr to AMPK, and is activated by glucose deprivation HF1a - Snrk - angiognesis. Therefore low levels, less angiognenesis	Angiognesis, glucose sensing, intergin signaling, AMPK
ENSMUSG00000045302	Preb	ENSMUST00000202567.1,ENSMUST00000201821.3,ENSMUST00000202904.1,ENSMUST00000202472.1,ENSMUST00000074840.11,ENSMUST00000202593.1,ENSMUST00000202590.1,ENSMUST00000201002.3,ENSMUST00000201730.1,ENSMUST00000202930.1,ENSMUST00000200836.1,ENSMUST00000202445.1,ENSMUST00000200756.1	processed_transcript,retained_intron,protein_coding	-0.211885	7.34493	1.97668e-05	0.00149575	Prolactin Regulatory Element Binding	This gene encodes a protein that specifically binds to a Pit1-binding element of the prolactin (PRL) promoter. This protein may act as a transcriptional regulator and is thought to be involved in some of the developmental abnormalities observed in patients with partial trisomy 2p. This gene overlaps the abhydrolase domain containing 1 (ABHD1) gene on the opposite strand. [provided by RefSeq, Jul …	https://pubmed.ncbi.nlm.nih.gov/29601978/?from_term=Preb&from_pos=1	Metabolism	1.7	Glucose			GTPase SARB1 activation, glucose homeostasis, downregulated in obese mice
ENSMUSG00000005533	Igf1r	ENSMUST00000208871.1,ENSMUST00000208731.1,ENSMUST00000207487.1,ENSMUST00000207621.1,ENSMUST00000208348.1,ENSMUST00000005671.9	retained_intron,protein_coding	-0.183574	9.45802	0.00111479	0.0255389	This receptor binds insulin-like growth factor with a high affinity.	Receptor tyrosine kinase which mediates actions of insulin-like growth factor 1 (IGF1). Binds IGF1 with high affinity and IGF2 and insulin (INS) with a lower affinity. The activated IGF1R is involved in cell growth and survival control. IGF1R is crucial for tumor transformation and survival of malignant cell. Ligand binding activates the receptor kinase, leading to receptor autophosphorylation, a…	https://www.ncbi.nlm.nih.gov/pmc/articles/PMC5617345/	Metabolism	1.7	Glucose		Signaling possible metabolism with insulin	Insulin like growth factor, PI3K, Ras-MAPK, JakSTAT, Mtor
ENSMUSG00000021134	Srsf5	ENSMUST00000151036.1,ENSMUST00000110351.7,ENSMUST00000094693.10,ENSMUST00000138434.7,ENSMUST00000152662.1,ENSMUST00000151968.1,ENSMUST00000153056.7,ENSMUST00000133783.7,ENSMUST00000110356.2,ENSMUST00000125814.8,ENSMUST00000110354.7,ENSMUST00000110352.9	nonsense_mediated_decay,processed_transcript,retained_intron,protein_coding	-0.180582	7.94156	0.000251807	0.00901133	Serine And Arginine Rich Splicing Factor 5	The protein encoded by this gene is a member of the serine/arginine (SR)-rich family of pre-mRNA splicing factors, which constitute part of the spliceosome. Each of these factors contains an RNA recognition motif (RRM) for binding RNA and an RS domain for binding other proteins. The RS domain is rich in serine and arginine residues and facilitates interaction between different SR splicing factors…	https://www.nature.com/articles/s41467-018-04815-3	Metabolism	1.7	Glucose	general	enhancing glucose consumption and acetyl-CoA production
ENSMUSG00000032902	Slc16a1	ENSMUST00000046212.1	protein_coding	-0.175536	6.75102	0.00100885	0.0238185	MCT1	gene is a proton-linked monocarboxylate transporter that catalyzes the movement of many monocarboxylates, such as lactate and pyruvate, across the plasma membrane.	https://pubmed.ncbi.nlm.nih.gov/32318771/	Metabolism	1.7	Glucose		Lower lactate export?	Lactate, ketone bodies
ENSMUSG00000027953	Slc50a1	ENSMUST00000148095.1,ENSMUST00000133575.7,ENSMUST00000130690.1,ENSMUST00000130230.1,ENSMUST00000185119.7,ENSMUST00000144777.7,ENSMUST00000132445.7,ENSMUST00000107460.7,ENSMUST00000029565.10	nonsense_mediated_decay,processed_transcript,retained_intron,protein_coding	-0.166847	6.64748	0.000628603	0.0171864	Solute Carrier Family 50 Member 1/SWEET1	Mediates both low-affinity uptake and efflux of sugar across the plasma membrane. Can transport glucose, and, to a lower extent, mannose, fructose and galactose.		Metabolism	1.7	Glucose	Sugar transport	Glucose treansporter	Glucose transport
ENSMUSG00000025006	Sorbs1	ENSMUST00000099467.9,ENSMUST00000099466.9,ENSMUST00000165469.1,ENSMUST00000165212.7	protein_coding	-0.153503	7.10223	0.000298019	0.0101021	Sorbin And SH3 Domain Containing 1	This gene encodes a CBL-associated protein which functions in the signaling and stimulation of insulin. Mutations in this gene may be associated with human disorders of insulin resistance. Alternative splicing results in multiple transcript variants. [provided by RefSeq, Mar 2014]		Metabolism	1.7	Glucose			Insulin signaling
ENSMUSG00000030695	Aldoa	ENSMUST00000141355.2,ENSMUST00000087566.10,ENSMUST00000153686.1,ENSMUST00000032934.11,ENSMUST00000139657.7,ENSMUST00000133514.7,ENSMUST00000135707.7,ENSMUST00000205336.1,ENSMUST00000106348.7,ENSMUST00000151137.7,ENSMUST00000147748.1,ENSMUST00000205890.1,ENSMUST00000207534.1,ENSMUST00000143509.7	nonsense_mediated_decay,processed_transcript,retained_intron,protein_coding	-0.136052	9.03601	0.000508412	0.0148198	Aldolase A (aka fructose-biphosphate adolase)	This gene encodes a member of the class I fructose-bisphosphate aldolase protein family. The encoded protein is a glycolytic enzyme that catalyzes the reversible conversion of fructose-1,6-bisphosphate to glyceraldehyde 3-phosphate and dihydroxyacetone phosphate. Three aldolase isozymes (A, B, and C), encoded by three different genes, are differentially expressed during development. Mutations in …		Metabolism	1.7	Glucose	glycolysis		Glycolysis, glucose metabolism,
ENSMUSG00000021109	Hif1a	ENSMUST00000110464.7,ENSMUST00000021530.7,ENSMUST00000110461.7,ENSMUST00000157041.1,ENSMUST00000149740.1	processed_transcript,retained_intron,protein_coding	0.14643	6.93113	0.00043753	0.013342	Hypoxia Inducible Factor 1 Subunit Alpha	Functions as a master transcriptional regulator of the adaptive response to hypoxia. Under hypoxic conditions, activates the transcription of over 40 genes, including erythropoietin, glucose transporters, glycolytic enzymes, vascular endothelial growth factor, HILPDA, and other genes whose protein products increase oxygen delivery or facilitate metabolic adaptation to hypoxia. Plays an essential …	https://www.ncbi.nlm.nih.gov/pmc/articles/PMC2822127/#:~:text=Hypoxia%2Dinducible%20factor%201%20(HIF,away%20from%20the%20mitochondria%3B%20and	Metabolism	1.7	Glucose	metabolism	Hypoxia-inducible factor 1 (HIF-1) plays a key role in the reprogramming of cancer metabolism by activating transcription of genes encoding glucose transporters and glycolytic enzymes, which take up glucose and convert it to lactate; pyruvate dehydrogenase kinase 1, which shunts pyruvate away from the mitochondri	Hypoxia, glycolysis, autophagy, mitocohdria
ENSMUSG00000034377	Tulp4	ENSMUST00000039655.2,ENSMUST00000141059.1,ENSMUST00000151732.1,ENSMUST00000144124.1,ENSMUST00000137063.1,ENSMUST00000149756.7,ENSMUST00000145340.7,ENSMUST00000126982.7,ENSMUST00000146758.7,ENSMUST00000152672.1,ENSMUST00000142030.7,ENSMUST00000149838.7	processed_transcript,retained_intron,protein_coding	0.169736	7.96436	0.000370115	0.0119683	TUB Like Protein 4	TULP4 (TUB Like Protein 4) is a Protein Coding gene. Diseases associated with TULP4 include Type 1 Diabetes Mellitus 5 and Chromosome 18Q Deletion Syndrome. Gene Ontology (GO) annotations related to this gene include DNA-binding transcription factor activity. An important paralog of this gene is WDR35.	https://www.ncbi.nlm.nih.gov/pmc/articles/PMC3218838/	Metabolism	1.7	Glucose		Linked to diabetes and insluin signalig	Insulin signaling, also used for cilia
ENSMUSG00000029924	Slc37a3	ENSMUST00000202714.3,ENSMUST00000200961.3,ENSMUST00000202400.3,ENSMUST00000202928.1,ENSMUST00000090243.7,ENSMUST00000202952.1,ENSMUST00000201448.3,ENSMUST00000202785.1,ENSMUST00000200771.3,ENSMUST00000202656.1,ENSMUST00000202749.3,ENSMUST00000200969.3,ENSMUST00000202204.3,ENSMUST00000201208.1	nonsense_mediated_decay,processed_transcript,retained_intron,protein_coding	0.183302	5.22463	0.00195334	0.0374606	Sugar Phosphate Exchanger 3, SPX3		https://www.ncbi.nlm.nih.gov/pmc/articles/PMC4180117/	Metabolism	1.7	Glucose	general	?	ER, glucose storage
ENSMUSG00000022440	C1qtnf6	ENSMUST00000137827.1,ENSMUST00000147093.1,ENSMUST00000023075.8	processed_transcript,protein_coding	0.210212	5.08844	0.00292479	0.0492658	C1q And TNF Related 6	CTRP6 mediates the phosphorylation of AMPK and acetyl-CoA carboxylase (ACC) in skeletal muscle cells, subsequently mediating glycogen accumulation and fatty acid oxidation. It induces the expression of the potent anti-inflammatory cytokine IL-10 in macrophages. CTRP6 may be a potential serum marker for hepatocellular carcinoma, contributing to tumor angiogenesis by activating the Akt pathway. CTR…	https://www.ncbi.nlm.nih.gov/pmc/articles/PMC5592665/	Metabolism	1.7	Glucose	metabolism
ENSMUSG00000019810	Fuca2	ENSMUST00000060212.12,ENSMUST00000166466.1,ENSMUST00000150048.1,ENSMUST00000130865.1,ENSMUST00000120549.1,ENSMUST00000121465.2	processed_transcript,retained_intron,protein_coding	0.212112	4.78981	0.00131969	0.0287112	Alpha-L-Fucosidase 2	This gene encodes a plasma alpha-L-fucosidase, which represents 10-20% of the total cellular fucosidase activity. The protein is a member of the glycosyl hydrolase 29 family, and catalyzes the hydrolysis of the alpha-1,6-linked fucose joined to the reducing-end N-acetylglucosamine of the carbohydrate moieties of glycoproteins. This enzyme is essential for Helicobacter pylori adhesion to human gas…	https://www.annualreviews.org/doi/full/10.1146/annurev-biochem-060713-035504?url_ver=Z39.88-2003&rfr_id=ori%3Arid%3Acrossref.org&rfr_dat=cr_pub++0pubmed	Metabolism	1.7	Glucose	Sugar	Fucose is a prominant cel membrane sugar, also linked to inflamamtion	Fucose production, cell membrane, inflamamtion
ENSMUSG00000029174	Tbc1d1	ENSMUST00000119756.5,ENSMUST00000140960.2,ENSMUST00000101195.8,ENSMUST00000199270.4,ENSMUST00000129389.7,ENSMUST00000147348.5,ENSMUST00000043893.12,ENSMUST00000121370.7	nonsense_mediated_decay,processed_transcript,retained_intron,protein_coding	0.277603	5.61648	8.51119e-05	0.00416733	TBC1 Domain Family Member 1	TBC1D1 is the founding member of a family of proteins sharing a 180- to 200-amino acid TBC domain presumed to have a role in regulating cell growth and differentiation. These proteins share significant homology with TRE2 (USP6; MIM 604334), yeast Bub2, and CDC16 (MIM 603461) (White et al., 2000 [PubMed 10965142]).[supplied by OMIM, Mar 2008]May act as a GTPase-activating protein for Rab family pr…	https://pubmed.ncbi.nlm.nih.gov/23374713/?from_term=Tbc1d1+&from_pos=6	Metabolism	1.7	Glucose		Impairs glucose transport	proliferation, RAB1, insulin glucose uptake
ENSMUSG00000023830	Igf2r	ENSMUST00000161738.1,ENSMUST00000024599.13,ENSMUST00000159127.1,ENSMUST00000162982.1	nonsense_mediated_decay,protein_coding	0.293577	7.44948	0.00020861	0.00782689	Insulin Like Growth Factor 2 Receptor	This gene encodes a receptor for both insulin-like growth factor 2 and mannose 6-phosphate. The binding sites for each ligand are located on different segments of the protein. This receptor has various functions, including in the intracellular trafficking of lysosomal enzymes, the activation of transforming growth factor beta, and the degradation of insulin-like growth factor 2.		Metabolism	1.7	Glucose	metabolism	Weird one. Located plasma memrane and ER. It traffick newely synthesized mannose-6-phosphorylated lysosomal enzymes from trans golgi to late endosomes, and uptake of lysosomal precursors. Degrades IGF2. Also activates TGFbeta1. TGFbeta1 is a mannose-6-phosphorylated protein, inactive version is cleaved by Igf2R to be active	Promote lysosme enzyme localization, Degrade Insulin like growth factor 2, increase TGFbeta levels	Yes
ENSMUSG00000026888	Grb14	ENSMUST00000028252.13,ENSMUST00000137085.1,ENSMUST00000134020.1,ENSMUST00000149193.7,ENSMUST00000146807.1,ENSMUST00000150643.7,ENSMUST00000145603.1,ENSMUST00000156765.1	processed_transcript,protein_coding	0.341859	3.25595	0.000902802	0.0222473	Growth Factor Receptor Bound Protein 14	The product of this gene belongs to a small family of adapter proteins that are known to interact with a number of receptor tyrosine kinases and signaling molecules. This gene encodes a growth factor receptor-binding protein that interacts with insulin receptors and insulin-like growth-factor receptors. This protein likely has an inhibitory effect on receptor tyrosine kinase signaling and, in par…	https://pubmed.ncbi.nlm.nih.gov/32099031/?from_term=Grb14&from_sort=pubdate&from_pos=2 https://www.ncbi.nlm.nih.gov/pmc/articles/PMC3374394/#:~:text=Insulin%2Dlike%20growth%20factor%2DI,stimulates%20free%20fatty%20acid%20utilization.	Metabolism	1.7	Glucose	Insulin like growth factor	Suppressess insulin receptor signaling, if target can we overcome insulin rtesistanve? ILG = promote fatty acid oxidation and protein sythemssi	Kinase signaling adaptor, insulin signaling inhibtion, ERK1, PDPK1 (therefore PIP2 signaling), AKT signaling
ENSMUSG00000026274	Pask	ENSMUST00000133886.1,ENSMUST00000128655.7,ENSMUST00000027493.3,ENSMUST00000139028.1,ENSMUST00000148355.1,ENSMUST00000128253.1	retained_intron,protein_coding	0.362567	4.13282	0.000641921	0.0174655	PAS Domain Containing Serine/Threonine Kinase	This gene encodes a member of the serine/threonine kinase family that contains two PAS domains. Expression of this gene is regulated by glucose, and the encoded protein plays a role in the regulation of insulin gene expression. Downregulation of this gene may play a role in type 2 diabetes. Alternatively spliced transcript variants encoding multiple isoforms have been observed for this gene. [pro…	https://pubmed.ncbi.nlm.nih.gov/26371032/?from_term=Pask&from_pos=9 https://pubmed.ncbi.nlm.nih.gov/26371032/?from_term=Pask&from_pos=9 https://pubmed.ncbi.nlm.nih.gov/30558306/	Metabolism	1.7	Glucose	sensor	under changing environmental conditions (oxygen, glucose, nutrition),	metabolic sensor, Glucose regulated expression, insulin secretion, PPAR, fatty acid metabolism
ENSMUSG00000009772	Nuak2	ENSMUST00000082125.5,ENSMUST00000133246.1,ENSMUST00000072177.13,ENSMUST00000128661.1	processed_transcript,retained_intron,protein_coding	0.424131	5.64346	2.48332e-05	0.00174436	NUAK Family Kinase 2	NUAK2 (NUAK Family Kinase 2) is a Protein Coding gene. Diseases associated with NUAK2 include Omphalocele. Among its related pathways are Glucose / Energy Metabolism and Apoptosis and Autophagy. Gene Ontology (GO) annotations related to this gene include transferase activity, transferring phosphorus-containing groups and protein tyrosine kinase activity. An important paralog of this gene is NUAK1…		Metabolism	1.7	Glucose	se oncogene mtor activation cell cycle		Glucose levels, increasing F-actin conversion to G-actin, AMPK kinase, cancer prolferation
ENSMUSG00000006205	Htra1	ENSMUST00000150905.1,ENSMUST00000153290.7,ENSMUST00000006367.7,ENSMUST00000140741.1,ENSMUST00000150717.7	processed_transcript,retained_intron,protein_coding	0.437428	5.89605	1.75932e-05	0.00137848	HtrA Serine Peptidase 1	This gene encodes a member of the trypsin family of serine proteases. This protein is a secreted enzyme that is proposed to regulate the availability of insulin-like growth factors (IGFs) by cleaving IGF-binding proteins. It has also been suggested to be a regulator of cell growth. Variations in the promoter region of this gene are the cause of susceptibility to age-related macular degeneration t…		Metabolism	1.7	Glucose	Protease	CARASIL caused by mtations that lower Htra1	lowers TGFbeta levels, Cleaves IGFs, ECM proteins fibronectin also proteoglcans
ENSMUSG00000035105	Egln3	ENSMUST00000039516.3	protein_coding	0.45859	2.63675	0.000257073	0.00908404	Egl-9 Family Hypoxia Inducible Factor 3	Cellular oxygen sensor that catalyzes, under normoxic conditions, the post-translational formation of 4-hydroxyproline in hypoxia-inducible factor (HIF) alpha proteins. Hydroxylates a specific proline found in each of the oxygen-dependent degradation (ODD) domains (N-terminal, NODD, and C-terminal, CODD) of HIF1A. Also hydroxylates HIF2A. Has a preference for the CODD site for both HIF1A and HIF2…		Metabolism	1.7	Glucose			Oxygen sensor, HIF degradation, glucose metabolism
ENSMUSG00000068335	Dok1	ENSMUST00000204900.1,ENSMUST00000149918.1,ENSMUST00000089651.5	nonsense_mediated_decay,protein_coding	0.513494	3.26417	8.50976e-05	0.00416733	Docking Protein 1	DOK proteins are enzymatically inert adaptor or scaffolding proteins. They provide a docking platform for the assembly of multimolecular signaling complexes. DOK1 appears to be a negative regulator of the insulin signaling pathway. Modulates integrin activation by competing with talin for the same binding site on ITGB3.		Metabolism	1.7	Glucose	Negative regualtor of insulin signaling, integrin binding	Inflammation
ENSMUSG00000024538	Ppic	ENSMUST00000025419.7	protein_coding	0.134903	7.41484	0.00198522	0.0378878	Peptidylprolyl Isomerase C,Cyclophilin C	The protein encoded by this gene is a member of the peptidyl-prolyl cis-trans isomerase (PPIase)) family. PPIases catalyze the cis-trans isomerization of proline imidic peptide bonds in oligopeptides and accelerate the folding of proteins. Similar to other PPIases, this protein can bind immunosuppressant cyclosporin A. [provided by RefSeq, Jul 2008]		Metabolism	1.8	UPR/ER	protein folding		Protein folding
ENSMUSG00000036854	Hspb6	ENSMUST00000123355.7,ENSMUST00000126989.7,ENSMUST00000146732.1,ENSMUST00000044048.7	processed_transcript,protein_coding	0.473154	3.76532	2.45783e-05	0.00173785	Heat Shock Protein Family B (Small) Member 6	Small heat shock protein which functions as a molecular chaperone probably maintaining denatured proteins in a folding-competent state. Seems to have versatile functions in various biological processes. Plays a role in regulating muscle function such as smooth muscle vasorelaxation and cardiac myocyte contractility. May regulate myocardial angiogenesis implicating KDR. Overexpression mediates car…	https://www.ncbi.nlm.nih.gov/pmc/articles/PMC3299679/	Metabolism	1.8	UPR/ER	protein folding	Over the past years, our laboratory has shown that elevated intracellular Hsp20 protects hearts against various stress stimuli including myocardial ischemia/reperfusion (I/R) injury [6], isoproterenol-triggered cardiac remodeling [7], endotoxin-induced myocardial dysfunction [8], and doxorubicin cardiotoxicity [9]. These salutary effects of Hsp20 are largely attributed to the inhibition of cardio…	Protection from stress, angiogenesis, signaling
ENSMUSG00000003355	Fkbp11	ENSMUST00000003445.6	protein_coding	0.650334	1.25806	0.00121194	0.027021	Peptidyl-prolyl cis-trans isomerase	Accelerate folding of protein in protein syntehsis, also associated with inflamamtion		Metabolism	1.8	UPR/ER	protein folding	Could be related to ER stress	Protein folding, ER stress
ENSMUSG00000019578	Ubxn6	ENSMUST00000153947.7,ENSMUST00000139371.1,ENSMUST00000134441.1,ENSMUST00000019722.11,ENSMUST00000146467.1,ENSMUST00000151943.7,ENSMUST00000132804.7	processed_transcript,retained_intron,protein_coding	-0.144628	6.08087	0.00179106	0.0355041	UBX Domain Protein 6	May negatively regulate the ATPase activity of VCP, an ATP-driven segregase that associates with different cofactors to control a wide variety of cellular processes (PubMed:26475856). As a cofactor of VCP, it may play a role in the transport of CAV1 to lysosomes for degradation (PubMed:21822278, PubMed:23335559). It may also play a role in endoplasmic reticulum-associated degradation (ERAD) of mi…	https://pubmed.ncbi.nlm.nih.gov/30120381/	Metabolism	1.8	UPR/ER	ER	Valosin-containing protein	endoplasmic reticulum-associated degradation (ERAD) of misfolded proteins, macroautophagy,, lysosomes, mitophagy
ENSMUSG00000035245	Eogt	ENSMUST00000135187.7,ENSMUST00000204331.2,ENSMUST00000142116.1,ENSMUST00000142553.7,ENSMUST00000113387.7,ENSMUST00000130562.1,ENSMUST00000054344.10,ENSMUST00000136575.7	processed_transcript,protein_coding	0.136578	7.65988	0.00204846	0.0386086	EGF Domain Specific O-Linked N-Acetylglucosamine Transferase	This gene encodes an enzyme that acts in the lumen of the endoplasmic reticulum to catalyze the transfer of N-acetylglucosamine to serine or threonine residues of extracellular-targeted proteins. This enzyme modifies proteins containing eukaryotic growth factor (EGF)-like domains, including the Notch receptor, thereby regulating developmental signalling. Mutations in this gene have been observed …	https://pubmed.ncbi.nlm.nih.gov/30669087/	Metabolism	1.8	UPR/ER	ER	protein localization	ER located, NOTCH signaling, glycosylation
ENSMUSG00000032116	Stt3a	ENSMUST00000217599.1,ENSMUST00000143881.1,ENSMUST00000120381.8,ENSMUST00000138358.2,ENSMUST00000128270.7,ENSMUST00000135934.1,ENSMUST00000137994.2,ENSMUST00000133060.2,ENSMUST00000215998.1	nonsense_mediated_decay,processed_transcript,retained_intron,protein_coding	0.14638	7.03742	0.00164597	0.0335372	STT3 Oligosaccharyltransferase Complex Catalytic Subunit A	The protein encoded by this gene is a catalytic subunit of the N-oligosaccharyltransferase (OST) complex, which functions in the endoplasmic reticulum to transfer glycan chains to asparagine residues of target proteins. A separate complex containing a similar catalytic subunit with an overlapping function also exists. Multiple transcript variants encoding different isoforms have been found for th…		Metabolism	1.8	UPR/ER	ER	Protein modification	ER protein glycosylation
ENSMUSG00000027248	Pdia3	ENSMUST00000130450.1,ENSMUST00000028683.13,ENSMUST00000153378.1,ENSMUST00000135079.1	nonsense_mediated_decay,processed_transcript,retained_intron,protein_coding	0.163788	8.57147	0.000261099	0.009183	Protein Disulfide Isomerase Family A Member 3	This gene encodes a protein of the endoplasmic reticulum that interacts with lectin chaperones calreticulin and calnexin to modulate folding of newly synthesized glycoproteins. The protein was once thought to be a phospholipase; however, it has been demonstrated that the protein actually has protein disulfide isomerase activity. It is thought that complexes of lectins and this protein mediate pro…	https://www.jbc.org/content/290/14/8949.full https://www.ncbi.nlm.nih.gov/pmc/articles/PMC5415245/	Metabolism	1.8	UPR/ER	ER	Many functions, ER protein but also found in plasma membrane (could have receptor activty). Is involved in virtually everything from inflamamtion to vitamin D signaling	ER, MHC, inflammation, vitamin D, mTOR, cytokine signaling
ENSMUSG00000050106	Tmc8	ENSMUST00000119455.1,ENSMUST00000117781.7,ENSMUST00000050874.13,ENSMUST00000156458.1,ENSMUST00000106334.8,ENSMUST00000127080.7	retained_intron,protein_coding	-0.379424	2.45077	0.00120189	0.0268503	Transmembrane Channel Like 8, Epidermodysplasia Verruciformis 2	Epidermodysplasia verruciformis (EV) is an autosomal recessive dermatosis characterized by abnormal susceptibility to human papillomaviruses (HPVs) and a high rate of progression to squamous cell carcinoma on sun-exposed skin. EV is caused by mutations in either of two adjacent genes located on chromosome 17q25.3. Both of these genes encode integral membrane proteins that localize to the endoplas…	https://pubmed.ncbi.nlm.nih.gov/30982308/	Metabolism	1.8	UPR/ER	ER		Asscoitaed with HPV and cancer risk
ENSMUSG00000026199	Ankzf1	ENSMUST00000145459.8,ENSMUST00000134233.8,ENSMUST00000127625.2,ENSMUST00000134378.8,ENSMUST00000151887.8,ENSMUST00000127860.1,ENSMUST00000152233.8,ENSMUST00000131788.8	nonsense_mediated_decay,retained_intron,protein_coding	-0.28162	4.28272	0.00176285	0.0351537	Ankyrin Repeat And Zinc Finger Peptidyl TRNA Hydrolase 1	Plays a role in the cellular response to hydrogen peroxide and in the maintenance of mitochondrial integrity under conditions of cellular stress (PubMed:28302725). Involved in the endoplasmic reticulum (ER)-associated degradation (ERAD) pathway loss of this protein = dysrpted mitochondria	https://www.ncbi.nlm.nih.gov/pmc/articles/PMC5427269/	Metabolism	1.8	UPR/ER	ER	Mitochondrial integrity, ROS
ENSMUSG00000048249	Crebrf	ENSMUST00000151681.1,ENSMUST00000142539.7,ENSMUST00000062519.13,ENSMUST00000144221.1,ENSMUST00000176845.1,ENSMUST00000132972.1	retained_intron,protein_coding	-0.262689	5.20887	0.000865798	0.021572	CREB3 Regulatory Factor	Acts as a negative regulator of the endoplasmic reticulum stress response or unfolded protein response (UPR). Represses the transcriptional activity of CREB3 during the UPR. Recruits CREB3 into nuclear foci.	https://pubmed.ncbi.nlm.nih.gov/29958463/?from_term=Crebrf+function&from_sort=pubdate&from_pos=5 https://pubmed.ncbi.nlm.nih.gov/29447354/?from_term=Crebrf+function&from_sort=pubdate&from_pos=8	Metabolism	1.8	UPR/ER	ER	upredualted by HDLStress/UPR	unfolded protein response, ER stressm mTOR, autophagy
ENSMUSG00000004071	Cdip1	ENSMUST00000117713.7,ENSMUST00000147225.7,ENSMUST00000152667.1,ENSMUST00000118703.7,ENSMUST00000140187.7,ENSMUST00000004173.11	retained_intron,protein_coding	-0.243332	5.92825	0.000204822	0.00773643	Cell Death Inducing P53 Target 1	cts as an important p53/TP53-apoptotic effector. Regulates TNF-alpha-mediated apoptosis in a p53/TP53-dependent manner.	https://pubmed.ncbi.nlm.nih.gov/24139803/?from_term=Cdip1&from_pos=1	Metabolism	1.8	UPR/ER	ER	CDIP1-BAP31 Complex Transduces Apoptotic Signals From Endoplasmic Reticulum to Mitochondria Under Endoplasmic Reticulum Stress	ER, mitochondria
ENSMUSG00000026203	Dnajb2	ENSMUST00000188346.6,ENSMUST00000187058.6,ENSMUST00000190445.1,ENSMUST00000185403.6,ENSMUST00000188290.6,ENSMUST00000188931.6,ENSMUST00000190379.1,ENSMUST00000188628.1,ENSMUST00000186600.1,ENSMUST00000055223.13,ENSMUST00000082158.12,ENSMUST00000185654.2	nonsense_mediated_decay,retained_intron,protein_coding	-0.221481	5.24096	0.00114944	0.025959	DnaJ Heat Shock Protein Family (Hsp40) Member B2, Heat Shock 40 KDa Protein 3	Functions as a co-chaperone, regulating the substrate binding and activating the ATPase activity of chaperones of the HSP70/heat shock protein 70 family (PubMed:7957263, PubMed:22219199). In parallel, also contributes to the ubiquitin-dependent proteasomal degradation of misfolded proteins (PubMed:15936278, PubMed:21625540). Thereby, may regulate the aggregation and promote the functional recover…		Metabolism	1.8	UPR/ER	ER	Stress/UPR	Heat shock protein, chaperone for proteins for correct folding, proteostasis, ER
ENSMUSG00000032285	Dnaja4	ENSMUST00000070070.7,ENSMUST00000120452.7,ENSMUST00000154690.7	protein_coding	-0.212357	5.06483	0.000519928	0.0150384	DnaJ Heat Shock Protein Family (Hsp40) Member A4	DNAJA4 (DnaJ Heat Shock Protein Family (Hsp40) Member A4) is a Protein Coding gene. Gene Ontology (GO) annotations related to this gene include unfolded protein binding and heat shock protein binding. An important paralog of this gene is DNAJA1.	https://pubmed.ncbi.nlm.nih.gov/27736938/?from_term=Dnaja4&from_sort=pubdate&from_pos=7	Metabolism	1.8	UPR/ER	ER	Stress/UPR	Heat shock protein, nfKB signaling,
ENSMUSG00000032437	Stt3b	ENSMUST00000035010.9	protein_coding	-0.198289	8.22325	0.000594534	0.0165161	STT3 Oligosaccharyltransferase Complex Catalytic Subunit B	The protein encoded by this gene is a catalytic subunit of a protein complex that transfers oligosaccharides onto asparagine residues. Catalytic subunit of the oligosaccharyl transferase (OST) complex that catalyzes the initial transfer of a defined glycan (Glc(3)Man(9)GlcNAc(2) in eukaryotes) from the lipid carrier dolichol-pyrophosphate to an asparagine residue within an Asn-X-Ser/Thr consensus…		Metabolism	1.8	UPR/ER	ER	ERAD	ER degradation pathhway, glycosylation
ENSMUSG00000042406	Atf4	ENSMUST00000109605.3	protein_coding	-0.1879	7.71622	0.000192581	0.00741108	Activating Transcription Factor 4	ranscriptional activator. Binds the cAMP response element (CRE) (consensus: 5'-GTGACGT[AC][AG]-3'), a sequence present in many viral and cellular promoters. Cooperates with FOXO1 in osteoblasts to regulate glucose homeostasis through suppression of beta-cell production and decrease in insulin production (By similarity). It binds to a Tax-responsive enhancer element in the long terminal repeat of …	https://www.ncbi.nlm.nih.gov/pubmed/25914608 https://www.frontiersin.org/articles/10.3389/fncel.2017.00410/full	Metabolism	1.8	UPR/ER	ER	Autophagy, higher levels meant to be detrimental to endothelial cell function	cAMP, Autohagy, inflammation, ER stress, UPR
ENSMUSG00000031770	Herpud1	ENSMUST00000211982.1,ENSMUST00000159450.1,ENSMUST00000161085.7,ENSMUST00000160866.1,ENSMUST00000161576.7,ENSMUST00000034220.7	nonsense_mediated_decay,retained_intron,protein_coding	-0.185202	6.36372	0.0010894	0.025131	Homocysteine Inducible ER Protein With Ubiquitin Like Domain 1	The accumulation of unfolded proteins in the endoplasmic reticulum (ER) triggers the ER stress response. This response includes the inhibition of translation to prevent further accumulation of unfolded proteins, the increased expression of proteins involved in polypeptide folding, known as the unfolded protein response (UPR), and the destruction of misfolded proteins by the ER-associated protein …		Metabolism	1.8	UPR/ER	ER	Stress/UPR	ER stress, unfolded protein response,
ENSMUSG00000068290	Ddrgk1	ENSMUST00000134044.7,ENSMUST00000135167.7,ENSMUST00000089559.10,ENSMUST00000135072.1,ENSMUST00000124559.1,ENSMUST00000153271.1	nonsense_mediated_decay,processed_transcript,retained_intron,protein_coding	-0.184356	6.17031	0.000130947	0.00570238	DDRGK Domain Containing 1	Protein which interacts with the E3 UFM1-protein ligase UFL1 and one of its substrates TRIP4 and is required for TRIP4 ufmylation. Through TRIP4 ufmylation may regulate nuclear receptors-mediated transcription (PubMed:25219498). May play a role in NF-kappa-B-mediated transcription through regulation of the phosphorylation and the degradation of NFKBIA, the inhibitor of NF-kappa-B (PubMed:23675531…	https://www.nature.com/articles/ncomms14186	Metabolism	1.8	UPR/ER	ER	Depletion = ER stress	ER stress, Ubiquitination, NFkb
ENSMUSG00000005881	Ergic3	ENSMUST00000150970.7,ENSMUST00000155370.1,ENSMUST00000142859.7,ENSMUST00000130793.7,ENSMUST00000144707.1,ENSMUST00000088650.10,ENSMUST00000006035.12,ENSMUST00000152568.1,ENSMUST00000137545.1,ENSMUST00000149381.1	processed_transcript,retained_intron,protein_coding	-0.117883	6.55469	0.00235754	0.042738	ERGIC And Golgi 3	Possible role in transport between endoplasmic reticulum and Golgi.		Metabolism	1.8	UPR/ER	ER	ER-golgi	ER - golgi transport, vesicle secretion
ENSMUSG00000036323	Srp72	ENSMUST00000132860.1,ENSMUST00000141873.1,ENSMUST00000150661.1,ENSMUST00000125732.1,ENSMUST00000101087.9,ENSMUST00000146167.1,ENSMUST00000144741.1,ENSMUST00000148423.1,ENSMUST00000120550.1	retained_intron,protein_coding	0.158981	6.68729	0.00028542	0.00980815	Signal Recognition Particle 72	This gene encodes the 72 kDa subunit of the signal recognition particle (SRP), a ribonucleoprotein complex that mediates the targeting of secretory proteins to the endoplasmic reticulum (ER). The SRP complex consists of a 7S RNA and 6 protein subunits: SRP9, SRP14, SRP19, SRP54, SRP68, and SRP72, that are bound to the 7S RNA as monomers or heterodimers. SRP has at least 3 distinct functions that …		Metabolism	1.8	UPR/ER	ER	ER protein secretion	Secretory proteins ER
ENSMUSG00000037072	Selenof	ENSMUST00000151086.2,ENSMUST00000082437.9,ENSMUST00000198279.1,ENSMUST00000198936.1,ENSMUST00000106211.1,ENSMUST00000144859.3	processed_transcript,retained_intron,protein_coding	0.168675	7.39173	0.00094873	0.0230755	Selenoprotein F	The protein encoded by this gene belongs to the SEP15/selenoprotein M family. The exact function of this protein is not known; however, it has been found to associate with UDP-glucose:glycoprotein glucosyltransferase (UGTR), an endoplasmic reticulum(ER)-resident protein, which is involved in the quality control of protein folding. The association with UGTR retains this protein in the ER, where it…		Metabolism	1.8	UPR/ER	ER	cancer, stress responses, thioredoxin-like oxidoreductase that occurs in a complex with UDP-glucose:glycoprotein glucosyltransferase.	ER stress, protein folding, thioredoxin
ENSMUSG00000027006	Dnajc10	ENSMUST00000125000.7,ENSMUST00000133536.1,ENSMUST00000154912.1,ENSMUST00000028392.7,ENSMUST00000153093.1	processed_transcript,protein_coding	0.18	7.33863	0.000813908	0.0207178	DnaJ Heat Shock Protein Family (Hsp40) Member C10	Endoplasmic reticulum disulfide reductase involved both in the correct folding of proteins and degradation of misfolded proteins. Required for efficient folding of proteins in the endoplasmic reticulum by catalyzing the removal of non-native disulfide bonds formed during the folding of proteins, such as LDLR. Also involved in endoplasmic reticulum-associated degradation (ERAD) by reducing incorre…	https://pubmed.ncbi.nlm.nih.gov/23769672/?from_single_result=Dnajc10+ldlr	Metabolism	1.8	UPR/ER	ER	Stress/UPR	Heat shock protein, ER associated protein degradion of misfolded proteins (e.g. LDLR)
ENSMUSG00000022964	Tmem50b	ENSMUST00000141885.1,ENSMUST00000023686.14,ENSMUST00000133180.7	nonsense_mediated_decay,protein_coding	0.236735	4.78949	0.000392733	0.0124139	Transmembrane Protein 50B	TMEM50B (Transmembrane Protein 50B) is a Protein Coding gene. Diseases associated with TMEM50B include Immunodeficiency 28 and Retinitis Pigmentosa 58. An important paralog of this gene is TMEM50A.	https://pubmed.ncbi.nlm.nih.gov/18541381/?from_term=Tmem50B&from_pos=1	Metabolism	1.8	UPR/ER	ER	https://pubmed.ncbi.nlm.nih.gov/18541381/	ER, Golgi
ENSMUSG00000020048	Hsp90b1	ENSMUST00000020238.13,ENSMUST00000129178.7,ENSMUST00000146897.1,ENSMUST00000129413.1,ENSMUST00000134515.1	retained_intron,protein_coding	0.2398	8.79639	6.39116e-06	0.000687249	(aka endoplasmin) Heat Shock Protein 90 Beta Family Member 1	This gene encodes a member of a family of adenosine triphosphate(ATP)-metabolizing molecular chaperones with roles in stabilizing and folding other proteins. The encoded protein is localized to melanosomes and the endoplasmic reticulum. Expression of this protein is associated with a variety of pathogenic states, including tumor formation. There is a microRNA gene located within the 5' exon of th…	https://www.nature.com/articles/s41467-017-00314-z	Metabolism	1.8	UPR/ER	ER	https://www.ncbi.nlm.nih.gov/pmc/articles/PMC3652695/	Endoplasmic reticulum, UPR, altered by OGD, protection from stress
ENSMUSG00000036676	Tmtc3	ENSMUST00000128009.1,ENSMUST00000058154.14,ENSMUST00000134477.1,ENSMUST00000130883.1,ENSMUST00000099318.9	retained_intron,protein_coding	0.257718	5.06979	2.4123e-05	0.00171697	Transmembrane O-Mannosyltransferase Targeting Cadherins 3	Transfers mannosyl residues to the hydroxyl group of serine or threonine residues. The 4 members of the TMTC family are O-mannosyl-transferases dedicated primarily to the cadherin superfamily, each member seems to have a distinct role in decorating the cadherin domains with O-linked mannose glycans at specific regions. Also acts as O-mannosyl-transferase on other proteins such as PDIA3 (PubMed:28…		Metabolism	1.8	UPR/ER	ER	Stress/UPR	Proteosome, mannosylation of cadherins
ENSMUSG00000031146	Plp2	ENSMUST00000033486.5,ENSMUST00000136155.1,ENSMUST00000143854.1	retained_intron,protein_coding	0.259277	6.35792	9.88735e-06	0.000903689	Proteolipid Protein 2	This gene encodes an integral membrane protein that localizes to the endoplasmic reticulum in colonic epithelial cells. The encoded protein can multimerize and may function as an ion channel. A polymorphism in the promoter of this gene may be linked to an increased risk of X-linked cognitive disability. A pseudogene of this gene is found on chromosome 5. [provided by RefSeq, Jan 2010]		Metabolism	1.8	UPR/ER	ER	Ion channel	Endoplasmic reticulum (ER), MAPK siganling,
ENSMUSG00000022769	Sdf2l1	ENSMUST00000023453.7	protein_coding	0.317238	3.77358	0.00131598	0.0286757	Stromal Cell Derived Factor 2 Like 1	SDF2L1 (Stromal Cell Derived Factor 2 Like 1) is a Protein Coding gene. Diseases associated with SDF2L1 include Walker-Warburg Syndrome. Gene Ontology (GO) annotations related to this gene include chaperone binding and misfolded protein binding. An important paralog of this gene is SDF2.	https://pubmed.ncbi.nlm.nih.gov/30814508/	Metabolism	1.8	UPR/ER	ER	linked to diabetes and metabolism	ER stress regulated gene, prevents protein aggregation
ENSMUSG00000028980	H6pd	ENSMUST00000153394.1,ENSMUST00000030830.3,ENSMUST00000084117.12,ENSMUST00000152907.1	processed_transcript,protein_coding	0.333272	7.75721	9.49851e-07	0.000183806	Hexose-6-Phosphate Dehydrogenase/Glucose 1-Dehydrogenase	Bifunctional enzyme localized in the lumen of the endoplasmic reticulum that catalyzes the first two steps of the oxidative branch of the pentose phosphate pathway/shunt, an alternative to glycolysis and a major source of reducing power and metabolic intermediates for biosynthetic processes (By similarity). Has a hexose-6-phosphate dehydrogenase activity, with broad substrate specificity compared…	https://pubmed.ncbi.nlm.nih.gov/30582899-glucose-6-phosphate-dehydrogenase-deficiency-increases-cell-adhesion-molecules-and-activates-human-monocyte-endothelial-cell-adhesion-protective-role-of-l-cysteine/ https://pubmed.ncbi.nlm.nih.gov/12777375-glucose-6-phosphate-dehydrogenase-modulates-vascular-endothelial-growth-factor-mediated-angiogenesis/	Metabolism	1.8	UPR/ER	ER	Pentose phosphate shunt	pentose phosphate pathway/shunt, NAPDH production
ENSMUSG00000030654	Arl6ip1	ENSMUST00000203154.2,ENSMUST00000205182.2,ENSMUST00000204005.2,ENSMUST00000206536.1,ENSMUST00000032888.9,ENSMUST00000206491.1	nonsense_mediated_decay,processed_transcript,retained_intron,protein_coding	0.377608	7.02749	2.61523e-06	0.000375123	ADP Ribosylation Factor Like GTPase 6 Interacting Protein 1	ositively regulates SLC1A1/EAAC1-mediated glutamate transport by increasing its affinity for glutamate in a PKC activity-dependent manner. Promotes the catalytic efficiency of SLC1A1/EAAC1 probably by reducing its interaction with ARL6IP5, a negative regulator of SLC1A1/EAAC1-mediated glutamate transport (By similarity). Plays a role in the formation and stabilization of endoplasmic reticulum tub…		Metabolism	1.8	UPR/ER	ER	Would result in higher glutamate uptake by the cell (traditional fucntion) or is involved in apoptosis	Amino acid trafficking, glutamate uptake, stabilzes ER
ENSMUSG00000090877	Hspa1b	ENSMUST00000172753.1	protein_coding	-0.451573	2.92503	0.000431219	0.0132033	Heat Shock Protein Family A (Hsp70) Member 1B	Molecular chaperone implicated in a wide variety of cellular processes, including protection of the proteome from stress, folding and transport of newly synthesized polypeptides, activation of proteolysis of misfolded proteins and the formation and dissociation of protein complexes. Plays a pivotal role in the protein quality control system, ensuring the correct folding of proteins, the re-foldin…	https://pubmed.ncbi.nlm.nih.gov/26656590/?from_term=Hspa1b+endothelial+cell&from_sort=pubdate&from_pos=2	Metabolism	1.8	UPR/ER	HSP	Stress/UPR	Protein homesostasis in response to stress, nitric oxide signaling
ENSMUSG00000063802	Hspbp1	ENSMUST00000206946.1,ENSMUST00000205474.1,ENSMUST00000079970.5,ENSMUST00000206306.1,ENSMUST00000206708.1,ENSMUST00000205952.1	processed_transcript,protein_coding	-0.221746	4.31664	0.00170146	0.0341762	HSPA (Hsp70) Binding Protein 1	Inhibits HSPA1A chaperone activity by changing the conformation of the ATP-binding domain of HSPA1A and interfering with ATP binding. Interferes with ubiquitination mediated by STUB1 and inhibits chaperone-assisted degradation of immature CFTR.		Metabolism	1.8	UPR/ER	HSP		HSP, interfers with CTFR (high in our gene list)
ENSMUSG00000038695	Josd2	ENSMUST00000118493.7,ENSMUST00000131817.1,ENSMUST00000130220.7,ENSMUST00000136609.7,ENSMUST00000133656.7,ENSMUST00000118628.7,ENSMUST00000139097.1,ENSMUST00000117324.7,ENSMUST00000149341.7,ENSMUST00000121922.2,ENSMUST00000035844.10,ENSMUST00000134398.2,ENSMUST00000206887.1,ENSMUST00000136679.7,ENSMUST00000132952.2,ENSMUST00000155659.1,ENSMUST00000208117.1,ENSMUST00000120852.7,ENSMUST00000206210.1	nonsense_mediated_decay,processed_transcript,retained_intron,protein_coding	-0.258712	4.93465	3.56992e-05	0.00218017	Josephin Domain Containing 2	This gene encodes a protein containing a Josephin domain. Josephin domain-containing proteins are deubiquitinating enzymes which catalyze the hydrolysis of the bond between the C-terminal glycine of the ubiquitin peptide and protein substrates. Alternatively spliced transcript variants encoding multiple isoforms have been observed for this gene. [provided by RefSeq, Jul 2012]		Metabolism	1.8	UPR/ER	Protein metabolism		Protein deubiquitinating enzyme, damaged proteins, ER?
ENSMUSG00000096727	Psmb9	ENSMUST00000173831.2,ENSMUST00000174576.2,ENSMUST00000179593.1,ENSMUST00000171321.1,ENSMUST00000178857.1,ENSMUST00000114230.2	retained_intron,protein_coding	0.355511	3.84088	1.68065e-05	0.00133466	Proteasome 20S Subunit Beta 9	The proteasome is a multicatalytic proteinase complex with a highly ordered ring-shaped 20S core structure. The core structure is composed of 4 rings of 28 non-identical subunits; 2 rings are composed of 7 alpha subunits and 2 rings are composed of 7 beta subunits. Proteasomes are distributed throughout eukaryotic cells at a high concentration and cleave peptides in an ATP/ubiquitin-dependent pro…		Metabolism	1.8	UPR/ER	Proteosome	The gene PSMB9 encodes a member of the proteasome B-type family, also known as the T1B family, that is a 20S core beta subunit.	Ubiquitination, proteosome, immunoproteasome, MHC1
ENSMUSG00000008348	Ubc	ENSMUST00000108707.2,ENSMUST00000156249.1,ENSMUST00000136312.1	protein_coding	-0.172716	6.59819	0.000124003	0.00549674	Ubiquitin C	[Ubiquitin]: Exists either covalently attached to another protein, or free (unanchored). When covalently bound, it is conjugated to target proteins via an isopeptide bond either as a monomer (monoubiquitin), a polymer linked via different Lys residues of the ubiquitin (polyubiquitin chains) or a linear polymer linked via the initiator Met of the ubiquitin (linear polyubiquitin chains). Polyubiqui…		Metabolism	1.8	UPR/ER		Ubiq	Ubiquitination,
ENSMUSG00000066621	Tecpr1	ENSMUST00000136018.1,ENSMUST00000147992.1,ENSMUST00000130962.1,ENSMUST00000140524.1,ENSMUST00000156129.1,ENSMUST00000151479.1,ENSMUST00000153751.7,ENSMUST00000137149.7,ENSMUST00000085701.6,ENSMUST00000125672.1,ENSMUST00000153103.7,ENSMUST00000196360.1	processed_transcript,retained_intron,protein_coding	-0.303652	7.69654	3.43379e-08	2.66107e-05	Tectonin Beta-Propeller Repeat Containing 1	This gene encodes a tethering factor involved in autophagy. The encoded protein is found at autolysosomes, and is involved in targeting protein aggregates, damaged mitochondria, and bacterial pathogens for autophagy [provided by RefSeq, Nov 2012] Tethering factor involved in autophagy. Involved in autophagosome maturation by promoting the autophagosome fusion with lysosomes: acts by associating w…		Metabolism	1.9	Autophagy/Lysosome	Autophagy	Tethers autophagosome to the lysosome	Autophagy, by associating with both the ATG5-ATG12 conjugate and phosphatidylinositol-3-phosphate (PtdIns(3)P) present at the surface of autophagosomes.
ENSMUSG00000002083	Bbc3	ENSMUST00000209688.1,ENSMUST00000147267.1,ENSMUST00000136781.1,ENSMUST00000002152.12	retained_intron,protein_coding	-0.298289	4.51523	0.000228258	0.00834126	BCL2 Binding Component 3/PUMA	Essential mediator of p53/TP53-dependent and p53/TP53-independent apoptosis (PubMed:11463391). Functions by promoting partial unfolding of BCL2L1 and dissociation of BCL2L1 from p53/TP53. Regulates ER stress-induced neuronal apoptosIS The majority of PUMA induced apoptosis occurs through activation of the tumor suppressor protein p53. p53 is activated by survival signals such as glucose deprivati…	https://www.cell.com/cell-reports/comments/S2211-1247(12)00327-0	Metabolism	1.9	Autophagy/Lysosome	Autophagy	Impairs autphagy and results in lower calcium evels	Angiogenesis, proliferation, calcium signaling, mitochondrial funciton, autophagy, ER stress
ENSMUSG00000024975	Pdcd4	ENSMUST00000165617.1,ENSMUST00000025931.12,ENSMUST00000074371.11	protein_coding	-0.248284	7.54044	0.00284049	0.0485085	Programmed Cell Death 4	Inhibits translation initiation and cap-dependent translation. May excert its function by hindering the interaction between EIF4A1 and EIF4G. Inhibits the helicase activity of EIF4A. Modulates the activation of JUN kinase. Down-regulates the expression of MAP4K1, thus inhibiting events important in driving invasion, namely, MAPK85 activation and consequent JUN-dependent transcription. May play a …	https://pubmed.ncbi.nlm.nih.gov/29912279/	Metabolism	1.9	Autophagy/Lysosome	Autophagy	inhibitor	Tumor suppresor, inhibits autophagy
ENSMUSG00000021559	Dapk1	ENSMUST00000044083.7,ENSMUST00000077453.11	protein_coding	-0.18726	7.64681	0.00113646	0.0257235	Death Associated Protein Kinase 1	Calcium/calmodulin-dependent serine/threonine kinase involved in multiple cellular signaling pathways that trigger cell survival, apoptosis, and autophagy. Regulates both type I apoptotic and type II autophagic cell deaths signal, depending on the cellular setting. The former is caspase-dependent, while the latter is caspase-independent and is characterized by the accumulation of autophagic vesic…	https://www.frontiersin.org/articles/10.3389/fnmol.2016.00046/full	Metabolism	1.9	Autophagy/Lysosome	Autophagy	Promotes	Activates mTOR, autophagy, tumour suppressor, calcium calmodulin
ENSMUSG00000022553	Maf1	ENSMUST00000161391.1,ENSMUST00000160097.1,ENSMUST00000162865.7,ENSMUST00000160172.7,ENSMUST00000162871.1,ENSMUST00000161527.7,ENSMUST00000160875.1,ENSMUST00000161072.1,ENSMUST00000160069.1,ENSMUST00000161786.1,ENSMUST00000160914.1,ENSMUST00000023212.14,ENSMUST00000160857.7,ENSMUST00000160853.7	processed_transcript,retained_intron,protein_coding	-0.181649	6.13883	0.000419846	0.0129967	MAF1 Homolog, Negative Regulator Of RNA Polymerase III	Plays a role in the repression of RNA polymerase III-mediated transcription in response to changing nutritional, environmental and cellular stress conditions to balance the production of highly abundant tRNAs, 5S rRNA, and other small non-coding RNAs with cell growth and maintenance (PubMed:18377933, PubMed:20233713, PubMed:20516213, PubMed:20543138). Plays also a key role in cell fate determinat…	https://pubmed.ncbi.nlm.nih.gov/29248739/?from_term=Maf1&from_pos=1	Metabolism	1.9	Autophagy/Lysosome	Autophagy	Autophagy	Stress reponse, mTOR, increases autophagy, increases fatty acid metabolis,
ENSMUSG00000038371	Sbf2	ENSMUST00000165992.1,ENSMUST00000164599.7,ENSMUST00000171218.7,ENSMUST00000164525.1,ENSMUST00000166020.7,ENSMUST00000171378.7,ENSMUST00000164759.7,ENSMUST00000033058.13,ENSMUST00000166885.1,ENSMUST00000167652.1,ENSMUST00000169740.1,ENSMUST00000165449.7,ENSMUST00000167880.7,ENSMUST00000164559.1,ENSMUST00000211732.1	nonsense_mediated_decay,retained_intron,protein_coding	-0.179693	7.65744	0.000212502	0.00794638	SET Binding Factor 2	Guanine nucleotide exchange factor (GEF) which activates RAB21 and possibly RAB28 (PubMed:20937701, PubMed:25648148). Promotes the exchange of GDP to GTP, converting inactive GDP-bound Rab proteins into their active GTP-bound form (PubMed:20937701, PubMed:25648148). In response to starvation-induced autophagy, activates RAB21 which in turn binds to and regulates SNARE protein VAMP8 endolysosomal …		Metabolism	1.9	Autophagy/Lysosome	Autophagy	Promotes	SNARE-mediated autophagosome-lysosome fusion
ENSMUSG00000033909	Usp36	ENSMUST00000151433.1,ENSMUST00000092382.9,ENSMUST00000141647.7,ENSMUST00000106296.8,ENSMUST00000144153.7,ENSMUST00000148998.1	retained_intron,protein_coding	-0.156086	5.87829	0.00242459	0.0435694	Ubiquitin Specific Peptidase 36	Deubiquitinase essential for the regulation of nucleolar structure and function. Required for cell and organism viability. Plays an important role in ribosomal RNA processing and protein synthesis, which is mediated, at least in part, through deubiquitination of DHX33, NPM1 and FBL, regulating their protein stability (PubMed:29273634, PubMed:19208757, PubMed:22902402). Function as a transcription…	https://pubmed.ncbi.nlm.nih.gov/30975468/	Metabolism	1.9	Autophagy/Lysosome	Autophagy		ubiquitination, cell prolferation, differentiation, cmyc stabilizer, SOD2, protection from damage
ENSMUSG00000039168	Dap	ENSMUST00000186425.6,ENSMUST00000186109.1,ENSMUST00000186547.6,ENSMUST00000044524.15,ENSMUST00000185618.1	protein_coding	0.148643	6.56115	0.00243988	0.0436923	Death Associated Protein	Negative regulator of autophagy. Involved in mediating interferon-gamma-induced cell death.		Metabolism	1.9	Autophagy/Lysosome	Autophagy		autophagy, cell death-IFN
ENSMUSG00000022765	Snap29	ENSMUST00000023449.8	protein_coding	0.180883	5.5405	0.000691588	0.0185474	Synaptosome Associated Protein 29	SNAREs, soluble N-ethylmaleimide-sensitive factor-attachment protein receptors, are essential proteins for fusion of cellular membranes. SNAREs localized on opposing membranes assemble to form a trans-SNARE complex, an extended, parallel four alpha-helical bundle that drives membrane fusion. SNAP29 is a SNARE involved in autophagy through the direct control of autophagosome membrane fusion with t…	https://pubmed.ncbi.nlm.nih.gov/11423532/?from_single_result=Snap29+endothelial+cell	Metabolism	1.9	Autophagy/Lysosome	Autophagy		endocytosis, insluin
ENSMUSG00000078920	Ifi47	ENSMUST00000109202.2,ENSMUST00000213728.1,ENSMUST00000046704.6,ENSMUST00000214804.1,ENSMUST00000152914.1	protein_coding	0.426797	3.77006	8.31893e-06	0.000819999	Immunity Related GTPase M	This gene encodes a member of the p47 immunity-related GTPase family. The encoded protein may play a role in the innate immune response by regulating autophagy formation in response to intracellular pathogens. Polymorphisms that affect the normal expression of this gene are associated with a susceptibility to Crohn's disease and tuberculosis. Alternative splicing results in multiple transcript va…		Metabolism	1.9	Autophagy/Lysosome	Autophagy		Autophagy, inflammation, IFNgamma
ENSMUSG00000020604	Arsg	ENSMUST00000106696.1,ENSMUST00000136336.1,ENSMUST00000152252.7,ENSMUST00000106697.7,ENSMUST00000020928.12	processed_transcript,protein_coding	-0.316473	3.08532	0.0028333	0.0484225	Arylsulfatase G	The protein encoded by this gene belongs to the sulfatase enzyme family. Sulfatases hydrolyze sulfate esters from sulfated steroids, carbohydrates, proteoglycans, and glycolipids. They are involved in hormone biosynthesis, modulation of cell signaling, and degradation of macromolecules. This protein displays arylsulfatase activity at acidic pH, as is typical of lysosomal sulfatases, and has been …	https://www.ncbi.nlm.nih.gov/pubmed/18283100 https://pubmed.ncbi.nlm.nih.gov/20679209/	Metabolism	1.9	Autophagy/Lysosome	Lysosome	heparan sulfate glycosaminoglycans, loss of function leads to lyssomal strogae disorders	Lysosomes, heparan sulfate glycosaminoglycans, sulphatides
ENSMUSG00000029016	Clcn6	ENSMUST00000030879.11,ENSMUST00000131232.1,ENSMUST00000105711.2,ENSMUST00000134377.7,ENSMUST00000137724.7	nonsense_mediated_decay,processed_transcript,protein_coding	-0.26859	5.11432	0.000184668	0.00714325	Chloride Voltage-Gated Channel 6	This gene encodes a member of the voltage-dependent chloride channel protein family. Members of this family can function as either chloride channels or antiporters. This protein is primarily localized to late endosomes and functions as a chloride/proton antiporter. Alternate splicing results in both coding and non-coding variants. Additional alternately spliced variants have been described but th…	https://pubmed.ncbi.nlm.nih.gov/26658788/?from_term=Clcn6+&from_pos=1 https://www.ncbi.nlm.nih.gov/pmc/articles/PMC2151350/	Metabolism	1.9	Autophagy/Lysosome	Lysosome	Ion chloride	chloride ions, blood pressure regulation, endosomes, acidiciation of endosomes
ENSMUSG00000057667	Bloc1s3	ENSMUST00000077408.7	protein_coding	-0.26219	3.68361	0.00143029	0.0303535	Biogenesis Of Lysosomal Organelles Complex 1 Subunit 3	Component of the BLOC-1 complex, a complex that is required for normal biogenesis of lysosome-related organelles (LRO), such as platelet dense granules and melanosomes. In concert with the AP-3 complex, the BLOC-1 complex is required to target membrane protein cargos into vesicles assembled at cell bodies for delivery into neurites and nerve terminals. The BLOC-1 complex, in association with SNAR…		Metabolism	1.9	Autophagy/Lysosome	lysosome		biogenesis of lysosome-related organelles (LRO), such as platelet dense granules and melanosomes
ENSMUSG00000025351	Cd63	ENSMUST00000219317.1,ENSMUST00000220245.1,ENSMUST00000026407.8,ENSMUST00000220308.1,ENSMUST00000105229.8,ENSMUST00000218450.1	processed_transcript,retained_intron,protein_coding	-0.242195	5.77677	0.000547137	0.0155847	CD63 Molecule, Lysosomal-Associated Membrane Protein 3	The protein encoded by this gene is a member of the transmembrane 4 superfamily, also known as the tetraspanin family. Most of these members are cell-surface proteins that are characterized by the presence of four hydrophobic domains. The proteins mediate signal transduction events that play a role in the regulation of cell development, activation, growth and motility. The encoded protein is a ce…		Metabolism	1.9	Autophagy/Lysosome	lysosome		vesicle secretion, Lysosome, integrin signaling, actin binding
ENSMUSG00000073725	Lmbrd1	ENSMUST00000191471.6,ENSMUST00000095062.9,ENSMUST00000186096.6,ENSMUST00000190195.1,ENSMUST00000187468.1,ENSMUST00000186190.1	retained_intron,protein_coding	-0.184803	6.05166	0.00166172	0.0337663	LMBR1 Domain Containing 1	This gene encodes a lysosomal membrane protein that may be involved in the transport and metabolism of cobalamin. This protein also interacts with the large form of the hepatitis delta antigen and may be required for the nucleocytoplasmic shuttling of the hepatitis delta virus. Mutations in this gene are associated with the vitamin B12 metabolism disorder termed, homocystinuria-megaloblastic anem…		Metabolism	1.9	Autophagy/Lysosome	lysosome	vitamin B12 metabolism	Vitamin B12 metabolism, lysosome
ENSMUSG00000021477	Ctsl	ENSMUST00000021933.7	protein_coding	-0.168071	9.06876	0.000115099	0.00517346	Cathepsin L	The protein encoded by this gene is a lysosomal cysteine proteinase that plays a major role in intracellular protein catabolism. Its substrates include collagen and elastin, as well as alpha-1 protease inhibitor, a major controlling element of neutrophil elastase activity. The encoded protein has been implicated in several pathologic processes, including myofibril necrosis in myopathies and in my…	https://www.ncbi.nlm.nih.gov/pmc/articles/PMC4747805/	Metabolism	1.9	Autophagy/Lysosome	lysosome	Substrates include collagen and other basemement membrane components. PDGFR and glucose regulate its expression	Lysosome, enkaphalin secretion, collagen
ENSMUSG00000034247	Plekhm1	ENSMUST00000184350.1,ENSMUST00000041272.9	nonsense_mediated_decay,protein_coding	-0.164322	6.40157	0.000213234	0.00796051	Pleckstrin Homology And RUN Domain Containing M1	Proposed to act as a multivalent adapter protein that regulates Rab7-dependent and HOPS complex-dependent fusion events in the endolysosomal system and couples autophagic and the endocytic trafficking pathways. Required for late stages of endolysosomal maturation, facilitating both endocytosis-mediated degradation of growth factor receptors and autophagosome clearance. Seems to be involved in the…	https://pubmed.ncbi.nlm.nih.gov/28325809/?from_term=Plekhm1+&from_pos=3	Metabolism	1.9	Autophagy/Lysosome	Lysosome	promote cargo target to lysosome	Autophagy, lysosome, Rab7
ENSMUSG00000015575	Atp6v0e	ENSMUST00000015719.14,ENSMUST00000167352.1	protein_coding	0.157192	5.78378	0.00290155	0.0490873	ATPase H+ Transporting V0 Subunit E1	This gene encodes a component of vacuolar ATPase (V-ATPase), a multisubunit enzyme that mediates acidification of eukaryotic intracellular organelles. V-ATPase dependent organelle acidification is necessary for such intracellular processes as protein sorting, zymogen activation, receptor-mediated endocytosis, and synaptic vesicle proton gradient generation. V-ATPase is composed of a cytosolic V1 …		Metabolism	1.9	Autophagy/Lysosome	Lysosome	acifidification	Acidify organelles
ENSMUSG00000001482	Def8	ENSMUST00000212391.1,ENSMUST00000001522.9,ENSMUST00000128424.7,ENSMUST00000132063.7,ENSMUST00000108830.1,ENSMUST00000212883.1,ENSMUST00000108832.7,ENSMUST00000065534.9,ENSMUST00000124741.7,ENSMUST00000212827.1,ENSMUST00000093049.9	protein_coding	0.203136	5.54878	0.000509493	0.014832	Differentially Expressed In FDCP 8 Homolog	Positively regulates lysosome peripheral distribution and ruffled border formation in osteoclasts. Involved in bone resorption.		Metabolism	1.9	Autophagy/Lysosome	lysosome		Lysosome trafficking, inflammation (chrons disease)
ENSMUSG00000041058	Wwp1	ENSMUST00000035982.7,ENSMUST00000108246.8	protein_coding	0.290339	6.22483	9.89177e-06	0.000903689	WW Domain Containing E3 Ubiquitin Protein Ligase 1	WW domain-containing proteins are found in all eukaryotes and play an important role in the regulation of a wide variety of cellular functions such as protein degradation, transcription, and RNA splicing. This gene encodes a protein which contains 4 tandem WW domains and a HECT (homologous to the E6-associated protein carboxyl terminus) domain. The encoded protein belongs to a family of NEDD4-lik…		Metabolism	1.9	Autophagy/Lysosome	lysosome	E3 ubiquitin-protein ligase which accepts ubiquitin from an E2 ubiquitin-conjugating enzyme in the form of a thioester and then directly transfers the ubiquitin to targeted substrates. Ubiquitinates ERBB4 isoforms JM-A CYT-1 and JM-B CYT-1, KLF2, KLF5 and TP63 and promotes their proteasomal degradation. Ubiquitinates RNF11 without targeting it for degradation. Ubiquitinates and promotes degradati…	Ubiquitination, inibition of TGF signaling
ENSMUSG00000000278	Scpep1	ENSMUST00000000287.8	protein_coding	0.299762	5.73476	8.56333e-07	0.000171832	Serine Carboxypeptidase 1/retinoid-inducible lysosomal serine carboxypeptidase 1	May be involved in vascular wall and kidney homeostasis.	https://journals.plos.org/plosgenetics/article?id=10.1371/journal.pgen.1004146	Metabolism	1.9	Autophagy/Lysosome	Lysosome	Lysosomal enzyme, may degrade endothelin
ENSMUSG00000028581	Laptm5	ENSMUST00000136082.1,ENSMUST00000156170.7,ENSMUST00000139023.1,ENSMUST00000151698.7,ENSMUST00000123550.7,ENSMUST00000030316.6,ENSMUST00000156225.7,ENSMUST00000156742.7,ENSMUST00000143450.1,ENSMUST00000125332.1	processed_transcript,protein_coding	0.358049	4.32936	6.10185e-05	0.0032496	Lysosomal Protein Transmembrane 5	This gene encodes a transmembrane receptor that is associated with lysosomes. The encoded protein, also known as E3 protein, may play a role in hematopoiesis. [provided by RefSeq, Feb 2009]	https://pubmed.ncbi.nlm.nih.gov/22733818/?from_term=Laptm5&from_pos=5	Metabolism	1.9	Autophagy/Lysosome	lysosome	Receptor	lysosome, inflammatory receptors
ENSMUSG00000042082	Arsb	ENSMUST00000091403.4	protein_coding	0.386225	6.07964	7.0312e-08	3.85413e-05	Arylsulfatase B	Arylsulfatase B encoded by this gene belongs to the sulfatase family. The arylsulfatase B homodimer hydrolyzes sulfate groups of N-Acetyl-D-galactosamine, chondriotin sulfate, and dermatan sulfate. The protein is targeted to the lysozyme. Mucopolysaccharidosis type VI is an autosomal recessive lysosomal storage disorder resulting from a deficiency of arylsulfatase B. Two alternatively spliced tra…	https://www.ncbi.nlm.nih.gov/pubmed/19536613	Metabolism	1.9	Autophagy/Lysosome	Lysosome	The purpose of the enzyme is to hydrolyze sulfates in the body. ARSB does this by breaking down glycosaminoglycans (GAGs), which are large sugar molecules in the body. ARSB targets two GAGs in particular: dermatan sulfate and chondroitin sulfate Also found on cell surface and interact with HSPG. Reduced sulfate availability due to impaired activity of ARSB has been linked to increased aerobic gly…	Lysosome, sulfatide degradation, HPSG, lower glycolysis
ENSMUSG00000020057	Dram1	ENSMUST00000020249.1,ENSMUST00000156097.1,ENSMUST00000138159.1	nonsense_mediated_decay,protein_coding	0.442458	3.86468	6.03324e-06	0.00066142	DNA Damage Regulated Autophagy Modulator 1	This gene is regulated as part of the p53 tumor suppressor pathway. The gene encodes a lysosomal membrane protein that is required for the induction of autophagy by the pathway. Decreased transcriptional expression of this gene is associated with various tumors. This gene has a pseudogene on chromosome 4. [provided by RefSeq, Jul 2008]	https://pubmed.ncbi.nlm.nih.gov/31492633/	Metabolism	1.9	Autophagy/Lysosome	Lysosome	Lysosome	Lysosome, autophagy, p53/TP53-mediated apoptosis, MTOR, LAT1
ENSMUSG00000062480	Acat3	ENSMUST00000160378.1,ENSMUST00000160921.1,ENSMUST00000043923.11	retained_intron,protein_coding	0.784932	0.704031	0.00109382	0.0251869	Acetyl-CoA acetyltransferase 3	Not sure, but assume behaves linke ACAT2?		Metabolism	1.x	General		Not sure, but in general these turn acetyl coA to coA	Acetyl coA
ENSMUSG00000005686	Ampd3	ENSMUST00000147587.1,ENSMUST00000143786.1,ENSMUST00000106686.1,ENSMUST00000213373.1,ENSMUST00000005829.12,ENSMUST00000176487.7,ENSMUST00000170374.7,ENSMUST00000148292.1	processed_transcript,retained_intron,protein_coding	0.377312	6.50244	1.64393e-09	4.98622e-06	Adenosine Monophosphate Deaminase 3	The encoded protein is a highly regulated enzyme that catalyzes the hydrolytic deamination of adenosine monophosphate to inosine monophosphate, a branch point in the adenylate catabolic pathway. This gene encodes the erythrocyte (E) isoforms	https://www.sciencedirect.com/science/article/pii/S1074552114003317	Metabolism	1.x	General		Loss of this results in higher ATP levels	ATP levels, AMPK, glucose metabolism
ENSMUSG00000028573	Fggy	ENSMUST00000043335.10,ENSMUST00000125742.7,ENSMUST00000107091.10,ENSMUST00000079223.10,ENSMUST00000153119.1,ENSMUST00000147783.7,ENSMUST00000150830.1,ENSMUST00000142384.1,ENSMUST00000134012.8,ENSMUST00000176840.7,ENSMUST00000143742.2,ENSMUST00000156223.1,ENSMUST00000177394.7,ENSMUST00000131654.8,ENSMUST00000130541.7,ENSMUST00000141248.7,ENSMUST00000147766.7,ENSMUST00000176162.7	nonsense_mediated_decay,processed_transcript,protein_coding	0.314052	3.37574	0.00284868	0.0486008	FGGY Carbohydrate Kinase Domain Containing	This gene encodes a protein that phosphorylates carbohydrates such as ribulose, ribitol, and L-arabinitol. Genome-wide association studies in some populations have found an association between polymorphisms in this gene and sporadic amyotrophic lateral sclerosis, but studies of other populations have not been able to replicate this association. Alternative splicing results in multiple transcript …		Metabolism	1.x	General	Carbohydrate phosphorylation	ALS	Phosphorylates carbohydrates
ENSMUSG00000027074	Slc43a3	ENSMUST00000155537.1,ENSMUST00000155506.1,ENSMUST00000138719.7,ENSMUST00000130278.1,ENSMUST00000090726.5,ENSMUST00000141650.7	processed_transcript,retained_intron,protein_coding	0.310383	7.33646	5.71052e-05	0.00310331	Solute Carrier Family 43 Member 3	an orphan transporter belonging to an amino acid transporter family, as a purine-selective nucleobase transporter.	https://www.nature.com/articles/srep15057	Metabolism	1.x	General	salvage	SLC43A3 is a facilitative and purine-selective nucleobase transporter that mediates the cellular uptake of extracellular purine nucleobases in cooperation with salvage enzymes.	Purine salvaging
ENSMUSG00000039231	Suv39h1	ENSMUST00000127617.1,ENSMUST00000115638.9,ENSMUST00000115637.7,ENSMUST00000115636.3,ENSMUST00000150095.7	retained_intron,protein_coding	0.224407	5.04649	0.000109872	0.00502907	Suppressor Of Variegation 3-9 Homolog 1	Histone methyltransferase that specifically trimethylates 'Lys-9' of histone H3 using monomethylated H3 'Lys-9' as substrate. Also weakly methylates histone H1 (in vitro). H3 'Lys-9' trimethylation represents a specific tag for epigenetic transcriptional repression by recruiting HP1 (CBX1, CBX3 and/or CBX5) proteins to methylated histones. Mainly functions in heterochromatin regions, thereby play…	https://pubmed.ncbi.nlm.nih.gov/21471221/ https://www.ncbi.nlm.nih.gov/pmc/articles/PMC4227600/	Metabolism	1.x	General		repressor of inflammation, part of the eNoSC (energy-dependent nucleolar silencing) complex that suppressess genes in response to low glucose levels and P53 activation	Cell cycle, with low glucose- suppressess gene transcription (p53), circadian rhythm
ENSMUSG00000041926	Rnpep	ENSMUST00000189615.1,ENSMUST00000141234.1,ENSMUST00000077340.13,ENSMUST00000190632.1,ENSMUST00000152169.1,ENSMUST00000074357.7,ENSMUST00000130069.1,ENSMUST00000141092.1,ENSMUST00000188053.1	processed_transcript,retained_intron,protein_coding	0.220796	7.25308	0.0019694	0.0376683	Arginyl Aminopeptidase	Exopeptidase which selectively removes arginine and/or lysine residues from the N-terminus of several peptide substrates including Arg(0)-Leu-enkephalin, Arg(0)-Met-enkephalin and Arg(-1)-Lys(0)-somatostatin-14. Can hydrolyze leukotriene A4 (LTA-4) into leukotriene B4 (LTB-4) (By similarity)		Metabolism	1.x	General
ENSMUSG00000033684	Qsox1	ENSMUST00000151368.1,ENSMUST00000140809.1,ENSMUST00000194632.1,ENSMUST00000111764.7,ENSMUST00000132495.1,ENSMUST00000130701.1,ENSMUST00000035325.14,ENSMUST00000195419.1	processed_transcript,retained_intron,protein_coding	0.172867	9.04191	0.00171152	0.0343129	Quiescin sulfhydryl oxidase 1	Enzyme that oxidizes thiols during protein folding, reducing molecular oxygen to hydrogen peroxide		Metabolism	1.x	General		Expressed in endothelial tumors (23098186). The gene expression is induced as fibroblasts begin to exit the proliferative cycle and enter quiescence, suggesting that this gene plays an important role in growth regulation	Laminin incorperation to basemement membrane
ENSMUSG00000022312	Eif3h	ENSMUST00000022925.8	protein_coding	0.161885	7.15009	0.000238931	0.008633	Eukaryotic Translation Initiation Factor 3 Subunit H	Component of the eukaryotic translation initiation factor 3 (eIF-3) complex, which is required for several steps in the initiation of protein synthesis (PubMed:17581632, PubMed:25849773, PubMed:27462815). The eIF-3 complex associates with the 40S ribosome and facilitates the recruitment of eIF-1, eIF-1A, eIF-2:GTP:methionyl-tRNAi and eIF-5 to form the 43S pre-initiation complex (43S PIC). The eIF…		Metabolism	1.x	General
ENSMUSG00000028430	Nol6	ENSMUST00000135059.1,ENSMUST00000155315.7,ENSMUST00000129112.1,ENSMUST00000030138.8	processed_transcript,protein_coding	-0.172462	5.86942	0.000339673	0.0112152	Nucleolar Protein 6	The nucleolus is a dense subnuclear membraneless organelle that assembles around clusters of rRNA genes and functions in ribosome biogenesis. This gene encodes a nucleolar RNA-associated protein that is highly conserved between species. RNase treatment of permeabilized cells indicates that the nucleolar localization is RNA dependent. Further studies suggest that the protein is associated with rib…	https://pubmed.ncbi.nlm.nih.gov/31377428/?from_term=Nol6+&from_sort=pubdate&from_pos=2	Metabolism	1.x	General		Linked to AD (see ref)	nucleous protein,
ENSMUSG00000024201	Kdm4b	ENSMUST00000141507.1,ENSMUST00000147489.1,ENSMUST00000132363.1,ENSMUST00000086835.11,ENSMUST00000025036.10,ENSMUST00000139679.7	processed_transcript,protein_coding	-0.208856	6.1264	5.82279e-05	0.00314571	Lysine Demethylase 4B	Histone demethylase that specifically demethylates 'Lys-9' of histone H3, thereby playing a role in histone code. Does not demethylate histone H3 'Lys-4', H3 'Lys-27', H3 'Lys-36' nor H4 'Lys-20'. Only able to demethylate trimethylated H3 'Lys-9', with a weaker activity than KDM4A, KDM4C and KDM4D. Demethylation of Lys residue generates formaldehyde and succinate.	https://pubmed.ncbi.nlm.nih.gov/29844188/?from_term=Kdm4b&from_pos=1	Metabolism	1.x	General		epigenetic modulator of energy homeostasis and metabolic health in mice. knockout = obesity	DNA damage, fatty acid metabolism, gluocse metabolism
ENSMUSG00000038534	Osbpl7	ENSMUST00000168565.1,ENSMUST00000143360.1,ENSMUST00000142406.1,ENSMUST00000142399.1,ENSMUST00000090020.11,ENSMUST00000154084.7	processed_transcript,retained_intron,protein_coding	-0.226868	4.46703	0.000253892	0.00901999	Oxysterol Binding Protein Like 7	This gene encodes a member of the oxysterol-binding protein (OSBP) family, a group of intracellular lipid receptors. Like most members, the encoded protein contains an N-terminal pleckstrin homology domain and a highly conserved C-terminal OSBP-like sterol-binding domain. Two transcript variants encoding the same isoform have been identified. [provided by RefSeq, Jul 2008]		Metabolism	1.x	General			Lipid product binding
ENSMUSG00000002763	Pex6	ENSMUST00000144964.7,ENSMUST00000002840.8,ENSMUST00000127897.1,ENSMUST00000148872.1	processed_transcript,retained_intron,protein_coding	-0.228364	5.5184	4.41196e-05	0.00254242	Peroxisomal Biogenesis Factor 6	This gene encodes a member of the AAA (ATPases associated with diverse cellular activities) family of ATPases. This member is a predominantly cytoplasmic protein, which plays a direct role in peroxisomal protein import and is required for PTS1 (peroxisomal targeting signal 1, a C-terminal tripeptide of the sequence ser-lys-leu) receptor activity. Mutations in this gene cause peroxisome biogenesis…		Metabolism	1.x	General			Peroxisome biosynthesis, import into the peroxisome
ENSMUSG00000053774	Ubxn7	ENSMUST00000115151.3	protein_coding	-0.238936	5.29822	0.000395467	0.0124677	UBX Domain Protein 7	biquitin-binding adapter that links a subset of NEDD8-associated cullin ring ligases (CRLs) to the segregase VCP/p97, to regulate turnover of their ubiquitination substrates.	https://pubmed.ncbi.nlm.nih.gov/32005965/?from_term=Ubxn7&from_pos=3	Metabolism	1.x	General			Ubiquitin, HIF1, mitochondria
ENSMUSG00000016344	Ppdpf	ENSMUST00000135011.1,ENSMUST00000016488.12,ENSMUST00000138800.7,ENSMUST00000108841.1,ENSMUST00000146089.7,ENSMUST00000127971.7	retained_intron,protein_coding	-0.252028	4.94307	0.000176009	0.00690337	Pancreatic Progenitor Cell Differentiation And Proliferation Factor	PPDPF (Pancreatic Progenitor Cell Differentiation And Proliferation Factor) is a Protein Coding gene. Diseases associated with PPDPF include Cholesterol Ester Storage Disease. An important paralog of this gene is PPDPFL.		Metabolism	1.x	General			proliferation, cholesterol storage
ENSMUSG00000038776	Ephx1	ENSMUST00000154133.7,ENSMUST00000147585.1,ENSMUST00000036928.11,ENSMUST00000111068.7	protein_coding	-0.292946	7.3844	4.03858e-06	0.000498698	Epoxide Hydrolase 1	Epoxide hydrolase is a critical biotransformation enzyme that converts epoxides from the degradation of aromatic compounds to trans-dihydrodiols which can be conjugated and excreted from the body. Epoxide hydrolase functions in both the activation and detoxification of epoxides. Mutations in this gene cause preeclampsia, epoxide hydrolase deficiency or increased epoxide hydrolase activity. Altern…		Metabolism	1.x	General			Detoxification of compounds, lipid processing, arachadonic acid metabolism	https://www.nature.com/articles/s41568-019-0187-8
ENSMUSG00000040746	Rnf167	ENSMUST00000152458.1,ENSMUST00000141695.7,ENSMUST00000141237.1,ENSMUST00000037534.7,ENSMUST00000152160.7,ENSMUST00000151034.8,ENSMUST00000141537.1,ENSMUST00000152276.7,ENSMUST00000143313.1,ENSMUST00000131071.1	nonsense_mediated_decay,processed_transcript,retained_intron,protein_coding	-0.312855	6.10258	1.84514e-05	0.00141528	Ring Finger Protein 167	RNF167 is an E3 ubiquitin ligase that interacts with TSSC5 (SLC22A18; MIM 602631) and, together with UBCH6 (UBE2E1; MIM 602916), facilitates TSSC5 polyubiquitylation (Yamada and Gorbsky, 2006 [PubMed 16314844]).[supplied by OMIM, Mar 2008]	https://pubmed.ncbi.nlm.nih.gov/27808481/?from_term=Ring+Finger+Protein+167&from_pos=2	Metabolism	1.x	General			Ubiquitination, lysosome positioning, vesicle trafficking
ENSMUSG00000028713	Cyp4b1	ENSMUST00000135569.7,ENSMUST00000145841.3,ENSMUST00000102707.9,ENSMUST00000143237.1	nonsense_mediated_decay,retained_intron,protein_coding	-0.45047	7.80535	1.80439e-09	4.98622e-06	Cytochrome P450 4B1	Monooxygenases which catalyze many reactions involved in drug metabolism and synthesis of cholesterol, steroids and other lipids. P450 enzymes usually function as monooxygenases in that they incorporate one atom of molecular oxygen into their substrates and reduce the other to water. CYP4 enzymes typically catalyze fatty acid ω-hydroxylase reactions.	https://www.ncbi.nlm.nih.gov/pubmed/11821980	Metabolism	1.x	General		angiogenesis; Hypoxic injury to the corneal surface increases the expression of both CYP4B1 and VEGF (22), suggesting a potential interaction between these pathways in the implementation of the inflammatory and angiogenic response after such an injury.	Endoplasmic reticulum, fatty acid metabolism, aryl hydrocarbons
ENSMUSG00000063796	Slc22a8	ENSMUST00000170817.1,ENSMUST00000010251.9	protein_coding	-0.500192	5.05901	7.88551e-07	0.00016878	OAT3	SLC22A8 (OAT3) is indirectly dependent on the inward sodium gradient, which is a driving force for reentry of dicarboxylates into the cytosol. Dicarboxylates, such as alpha-ketoglutarate generated within the cell, or recycled from the extracellular space, are used as exchange substrates to fuel the influx of organic anions against their concentration gradient. The encoded protein is an integral m…	https://www.ncbi.nlm.nih.gov/pmc/articles/PMC3372714/ https://www.ncbi.nlm.nih.gov/pmc/articles/PMC5612110/pdf/zbc15789.pdf	Metabolism	1.x	General	Transporter	Substate list is hard to find, but includes prostaglandins, lipids, low lvels in a weird way coulds lead to ketoglutarate accumualtion inside the cell	Oraganic ion transporter,
ENSMUSG00000078651	Aoc2	ENSMUST00000041095.13,ENSMUST00000107264.1	protein_coding	-0.594262	2.67509	8.99103e-06	0.000846915	Amine oxidase, copper containing 2	Copper amine oxidases catalyze the oxidative conversion of amines to aldehydes and ammonia in the presence of copper and quinone cofactor. This gene shows high sequence similarity to copper amine oxidases from various species ranging from bacteria to mammals. The protein contains several conserved motifs including the active site of amine oxidases and the histidine residues that likely bind coppe…	https://onlinelibrary.wiley.com/doi/pdf/10.1002/art.22061	Metabolism	1.x	General	Protein degradation	Also Leukocyte extravasation	dopamine, histamine, and putrescine degradation
ENSMUSG00000036120	Rfxank	ENSMUST00000211970.1,ENSMUST00000212320.1,ENSMUST00000212472.1,ENSMUST00000075724.8	retained_intron,protein_coding	-0.193106	4.56619	0.00253441	0.0448844	Regulatory Factor X Associated Ankyrin Containing Protein	Major histocompatibility (MHC) class II molecules are transmembrane proteins that have a central role in development and control of the immune system. The protein encoded by this gene, along with regulatory factor X-associated protein and regulatory factor-5, forms a complex that binds to the X box motif of certain MHC class II gene promoters and activates their transcription. Once bound to the p…	https://www.sciencedirect.com/topics/biochemistry-genetics-and-molecular-biology/rfxank	Inflammation	2.1	MHC class II			MHC class II
ENSMUSG00000026980	Ly75	ENSMUST00000028362.8,ENSMUST00000112533.7	protein_coding	0.259487	7.48906	0.00155725	0.0322262	Lymphocyte Antigen 75, CD205	Acts as an endocytic receptor to direct captured antigens from the extracellular space to a specialized antigen-processing compartment (By similarity). Causes reduced proliferation of B-lymphocytes.	https://pubmed.ncbi.nlm.nih.gov/21887537/	Inflammation	2.1	MHC class 1			Antigen capture, upregualted in cancer
ENSMUSG00000035929	H2-Q4	ENSMUST00000173975.1,ENSMUST00000081435.4	retained_intron,protein_coding	0.315468	6.56595	1.40524e-05	0.0012001	Histocompatibility 2, Q region locus 4	Part of MHC I		Inflammation	2.1	MHC class 1		MHC complex in a stressed cell?	MHC class 1 or 2?
ENSMUSG00000060802	B2m	ENSMUST00000102476.4	protein_coding	0.320529	9.05896	6.83502e-08	3.84026e-05	Beta-2-Microglobulin	This gene encodes a serum protein found in association with the major histocompatibility complex (MHC) class I heavy chain on the surface of nearly all nucleated cells. The protein has a predominantly beta-pleated sheet structure that can form amyloid fibrils in some pathological conditions.	https://www.ncbi.nlm.nih.gov/pmc/articles/PMC4800846/ https://pubmed.ncbi.nlm.nih.gov/26147761/	Inflammation	2.1	MHC class 1		Proaging facor - was a hot topic, is part of of MHC class I and aslo released as a soluble protein	MHC class I, inflammation, aging,
ENSMUSG00000060550	H2-Q7	ENSMUST00000173788.1,ENSMUST00000173016.1,ENSMUST00000076256.7,ENSMUST00000071951.12,ENSMUST00000078205.13,ENSMUST00000116598.9	retained_intron,protein_coding	0.806577	2.06296	0.00267459	0.0463802	H-2 class I histocompatibility antigen, Q7 alpha chain	MHC class 1	https://www.ncbi.nlm.nih.gov/pmc/articles/PMC4181710/	Inflammation	2.1	MHC class I		MHC complex in a stressed cell?	MHC class I
ENSMUSG00000073409	H2-Q6	ENSMUST00000113879.3,ENSMUST00000174699.7	protein_coding	0.84425	2.22227	0.000997541	0.0237487	histocompatibility 2, Q region locus 6	Predicted to be part of a-2 microglobulin complex, endogenous antigen presentation		Inflammation	2.1	MHC class 1		MHC complex in a stressed cell?	MHC class 1
ENSMUSG00000105504	Gbp5	ENSMUST00000197459.1,ENSMUST00000196255.4,ENSMUST00000199578.1,ENSMUST00000090127.6,ENSMUST00000198803.1	nonsense_mediated_decay,processed_transcript,retained_intron,protein_coding	0.252075	6.71439	0.000813998	0.0207178	Guanylate Binding Protein 5	s an activator of NLRP3 inflammasome assembly, plays a role in innate immunity and inflammation. Promotes selective NLRP3 inflammasome assembly in response to microbial and soluble, but not crystalline, agents (PubMed:22461501). Hydrolyzes GTP, but in contrast to other family members, does not produce GMP (PubMed:20180847). GBP5_HUMAN,Q96PP8		Inflammation	2.1	Inflammasome			Inflammasome assembly
ENSMUSG00000078945	Naip2	ENSMUST00000067975.11,ENSMUST00000167986.2,ENSMUST00000117913.7	protein_coding	0.607537	2.26335	1.78062e-06	0.000289982	NLR Family Apoptosis Inhibitory Protein	Anti-apoptotic protein which acts by inhibiting the activities of CASP3, CASP7 and CASP9. Can inhibit the autocleavage of pro-CASP9 and cleavage of pro-CASP3 by CASP9. Capable of inhibiting CASP9 autoproteolysis at 'Asp-315' and decreasing the rate of auto proteolysis at 'Asp-330'. Acts as a mediator of neuronal survival in pathological conditions. Prevents motor-neuron apoptosis induced by a var…		Inflammation	2.1	Inflammasome		Keep inflammamed cells alive?	Inflammasome, inhition of apoptosis
ENSMUSG00000074151	Nlrc5	ENSMUST00000212220.1,ENSMUST00000211816.1,ENSMUST00000098489.4,ENSMUST00000183132.1,ENSMUST00000137032.1,ENSMUST00000182409.8,ENSMUST00000212382.1,ENSMUST00000053085.11,ENSMUST00000183287.1	nonsense_mediated_decay,processed_transcript,retained_intron,protein_coding	0.740703	3.16405	7.58069e-09	9.46491e-06	NLR family CARD domain containing 5	This gene encodes a member of the caspase recruitment domain-containing NLR family. This gene plays a role in cytokine response and antiviral immunity through its inhibition of NF-kappa-B activation and negative regulation of type I interferon signaling pathways	https://www.ncbi.nlm.nih.gov/pmc/articles/PMC5313500/ https://www.ncbi.nlm.nih.gov/pmc/articles/PMC3669680/	Inflammation	2.1	Inflammasome		Damage cell signaling IHC inflammasome	MHC class I complex, inflammasome
ENSMUSG00000031154	Otud5	ENSMUST00000152899.1,ENSMUST00000033494.15,ENSMUST00000150644.7,ENSMUST00000148841.1,ENSMUST00000115666.7,ENSMUST00000130908.1,ENSMUST00000115668.9,ENSMUST00000115667.9,ENSMUST00000115665.1	processed_transcript,retained_intron,protein_coding	-0.135041	6.82861	0.00114307	0.0258443	OTU Deubiquitinase 5	This gene encodes a member of the OTU (ovarian tumor) domain-containing cysteine protease superfamily. The OTU domain confers deubiquitinase activity and the encoded protein has been shown to suppress the type I interferon-dependent innate immune response by cleaving the polyubiquitin chain from an essential type I interferon adaptor protein. Cleavage results in disassociation of the adaptor prot…		Inflammation	2.1	Viral IFN			deubiquitinase, suppress inflamamtion, cell cycle
ENSMUSG00000040296	Ddx58	ENSMUST00000140616.1,ENSMUST00000139110.1,ENSMUST00000142055.1,ENSMUST00000037907.12,ENSMUST00000139583.7,ENSMUST00000149539.1,ENSMUST00000136435.1,ENSMUST00000137903.7,ENSMUST00000135966.1,ENSMUST00000127026.7	processed_transcript,protein_coding	0.128412	7.03045	0.0022559	0.0414886	DExD/H-Box Helicase 58	Innate immune receptor that senses cytoplasmic viral nucleic acids and activates a downstream signaling cascade leading to the production of type I interferons and proinflammatory cytokines. Forms a ribonucleoprotein complex with viral RNAs on which it homooligomerizes to form filaments. The homooligomerization allows the recruitment of RNF135 an E3 ubiquitin-protein ligase that activates and amp…		Inflammation	2.1	Viral IFN			Innate immity, viral recogintion
ENSMUSG00000047735	Samd9l	ENSMUST00000201638.1,ENSMUST00000120087.5	protein_coding	0.224435	5.58702	5.92619e-05	0.00318625	Sterile Alpha Motif Domain Containing 9 Like	This gene encodes a cytoplasmic protein that acts as a tumor suppressor but also plays a key role in cell proliferation and the innate immune response to viral infection. The encoded protein contains an N-terminal sterile alpha motif domain. Naturally occurring mutations in this gene are associated with myeloid disorders such as juvenile myelomonocytic leukemia, acute myeloid leukemia, and myelod…		Inflammation	2.1	Viral IFN			Proliferation, endosome fusion, inflammation
ENSMUSG00000024349	Tmem173	ENSMUST00000115728.3	protein_coding	0.238287	5.20745	0.000674691	0.0181892	STING1, Stimulator Of Interferon Response CGAMP Interactor 1	acilitator of innate immune signaling that acts as a sensor of cytosolic DNA from bacteria and viruses and promotes the production of type I interferon (IFN-alpha and IFN-beta) (PubMed:18724357, PubMed:18818105, PubMed:19433799, PubMed:19776740, PubMed:23027953, PubMed:23910378, PubMed:23747010, PubMed:30842659). Innate immune response is triggered in response to non-CpG double-stranded DNA from …	https://pubmed.ncbi.nlm.nih.gov/32186434/?from_term=STING1&from_pos=2	Inflammation	2.1	Viral IFN		zalcitabine-induced mitochondrial DNA stress, which activates the STING1/TMEM173-mediated DNA sensing pathway, leading to macroautophagy/autophagy-dependent ferroptotic cell death via lipid peroxidation,	Autophagy in response to mitocodria stress, inflammation
ENSMUSG00000042349	Ikbke	ENSMUST00000162285.1,ENSMUST00000161764.7,ENSMUST00000062108.9,ENSMUST00000160748.7,ENSMUST00000159195.1,ENSMUST00000163029.1,ENSMUST00000162437.1	retained_intron,protein_coding	0.56565	2.26547	0.00280736	0.0481255	Inhibitor Of Nuclear Factor Kappa B Kinase Subunit Epsilon	Serine/threonine kinase that plays an essential role in regulating inflammatory responses to viral infection, through the activation of the type I IFN, NF-kappa-B and STAT signaling. Also involved in TNFA and inflammatory cytokines, like Interleukin-1, signaling. Following activation of viral RNA sensors, such as RIG-I-like receptors, associates with DDX3X and phosphorylates interferon regulatory…		Inflammation	2.1	Viral IFN		Also found in cancers, role in ox-LDL-induced injury of endothelial cells
ENSMUSG00000078922	Tgtp1	ENSMUST00000132745.1,ENSMUST00000146439.7,ENSMUST00000068063.3	protein_coding	0.591166	2.098	0.00147794	0.0310713	T-cell-specific guanine nucleotide triphosphate-binding protein 1	Involved in innate cell-autonomous resistance to intracellular pathogens, such as Toxoplasma gondii. During avirulent type II T. gondii infection, recruited to the parasitophorous vacuole (PV) membrane, leading to PV vesiculation and rupture, and subsequent digestion of the parasite within the cytosol (PubMed:19265156, PubMed:24563254). Not recruited to virulent type I T. gondii PV membrane (PubM…		Inflammation	2.1	Viral IFN			Intracellullar pathogen response,
ENSMUSG00000025491	Ifitm1	ENSMUST00000026564.8,ENSMUST00000106040.7,ENSMUST00000106042.8	protein_coding	0.594896	1.49537	0.000279301	0.0096421	Interferon Induced Transmembrane Protein 1	IFN-induced antiviral protein which inhibits the entry of viruses to the host cell cytoplasm, permitting endocytosis, but preventing subsequent viral fusion and release of viral contents into the cytosol. Active against multiple viruses, including influenza A virus, SARS coronavirus (SARS-CoV), Marburg virus (MARV), Ebola virus (EBOV), Dengue virus (DNV), West Nile virus (WNV), human immunodefici…		Inflammation	2.1	Viral IFN			Antiviral
ENSMUSG00000052776	Oas1a	ENSMUST00000080322.7	protein_coding	0.752283	1.37212	0.000139109	0.00595493	2'-5'-oligoadenylate synthetase 1	This gene is induced by interferons and encodes a protein that synthesizes 2',5'-oligoadenylates (2-5As). This protein activates latent RNase L, which results in viral RNA degradation and the inhibition of viral replication.		Inflammation	2.1	Viral IFN		High levels linked to aging in microglia	Antiviral, Inteferon,
ENSMUSG00000002885	Adgre5	ENSMUST00000075843.12,ENSMUST00000002964.13,ENSMUST00000139797.1,ENSMUST00000166939.7,ENSMUST00000109802.2,ENSMUST00000154075.1,ENSMUST00000149368.1,ENSMUST00000140606.1	nonsense_mediated_decay,retained_intron,protein_coding	-0.275013	7.68924	3.13885e-05	0.00201749	Adhesion G Protein-Coupled Receptor E5	aka CD97; In the immune system, CD97 is known as a critical mediator of host defense. Upon lymphoid, myeloid cells and neutrophil activation, CD97 is upregulated to promote adhesion and migration to sites of inflammation.	https://www.jimmunol.org/content/jimmunol/188/3/1442.full.pdf https://pubmed.ncbi.nlm.nih.gov/31397926/	Inflammation	2.1	Leukocyte adhesion/immune cell activation		present on activated endothelialc ells; CD97 on inflammotry cells stimulates angiogenesis through binding integrin counterreceptors on endothelial cells	Leukocyte attachment to endothelial cells, inflamamtion
ENSMUSG00000003420	Fcgrt	ENSMUST00000209830.1,ENSMUST00000211668.1,ENSMUST00000211535.1,ENSMUST00000210642.1,ENSMUST00000003512.8,ENSMUST00000211085.1	retained_intron,protein_coding	-0.176783	7.31179	0.00255834	0.0452013	Fc Fragment Of IgG Receptor And Transporter	ell surface receptor that transfers passive humoral immunity from the mother to the newborn. Binds to the Fc region of monomeric immunoglobulin gamma and mediates its selective uptake from milk (PubMed:7964511, PubMed:10933786). IgG in the milk is bound at the apical surface of the intestinal epithelium. The resultant FcRn-IgG complexes are transcytosed across the intestinal epithelium and IgG is…		Inflammation	2.1	Leukocyte adhesion/immune cell activation		FcRn is expressed on epithelial cells called podocytes to prevent IgG and albumin from clogging the glomerular filtration barrier.	Clearance of albumin and IgG
ENSMUSG00000031803	B3gnt3	ENSMUST00000034260.8	protein_coding	0.162454	7.71497	0.00133911	0.0289542	UDP-GlcNAc:BetaGal Beta-1,3-N-Acetylglucosaminyltransferase 3	This gene encodes a member of the beta-1,3-N-acetylglucosaminyltransferase family. This enzyme is a type II transmembrane protein and contains a signal anchor that is not cleaved. It prefers the substrates of lacto-N-tetraose and lacto-N-neotetraose, and is involved in the biosynthesis of poly-N-acetyllactosamine chains and the biosynthesis of the backbone structure of dimeric sialyl Lewis a. It …		Inflammation	2.1	Leukocyte adhesion/immune cell activation			L-selectin ligand biosyntehsis, lymphocyte trafficking
ENSMUSG00000046879	Irgm1	ENSMUST00000049519.3,ENSMUST00000097271.3,ENSMUST00000147151.1	processed_transcript,protein_coding	0.162519	4.96906	0.00221827	0.040949	Immunity Related GTPase M	This gene encodes a member of the p47 immunity-related GTPase family. The encoded protein may play a role in the innate immune response by regulating autophagy formation in response to intracellular pathogens. Polymorphisms that affect the normal expression of this gene are associated with a susceptibility to Crohn's disease and tuberculosis. Alternative splicing results in multiple transcript va…	https://pubmed.ncbi.nlm.nih.gov/22796503/	Inflammation	2.1	Leukocyte adhesion/immune cell activation			Autophagy, BBB disruption, cell infiltration, EAE
ENSMUSG00000078452	Raet1d	ENSMUST00000095795.4,ENSMUST00000182677.7	protein_coding	0.394699	3.07812	0.000126959	0.0055837	retinoic acid early-inducible protein 1-delta		https://pubmed.ncbi.nlm.nih.gov/27444966/?from_term=Raet1d&from_pos=3	Inflammation	2.1	Leukocyte adhesion/immune cell activation		Induced in EAE and inflammation	Inflammation, NK response
ENSMUSG00000027962	Vcam1	ENSMUST00000197031.1,ENSMUST00000196309.1,ENSMUST00000196449.4,ENSMUST00000029574.12	retained_intron,protein_coding	0.429469	9.11127	3.9829e-10	2.98372e-06	Vascular cell adhesion protein 1	Important in cell-cell recognition. Appears to function in leukocyte-endothelial cell adhesion. Interacts with integrin alpha-4/beta-1 (ITGA4/ITGB1) on leukocytes, and mediates both adhesion and signal transduction. The VCAM1/ITGA4/ITGB1 interaction may play a pathophysiologic role both in immune responses and in leukocyte emigration to sites of inflammation.	https://www.ncbi.nlm.nih.gov/pmc/articles/PMC5979609/	Inflammation	2.1	Leukocyte adhesion/immune cell activation		Leukocyte trafficking, also interacts with a4B1 integrin and plays a role ion angiognesis	Leukocyte trafficing, angiogenesis
ENSMUSG00000079685	Ulbp1	ENSMUST00000218717.1,ENSMUST00000218736.1,ENSMUST00000218087.1,ENSMUST00000169796.3,ENSMUST00000177585.8	processed_transcript,protein_coding	0.444787	6.46796	1.84196e-05	0.00141528	UL16 Binding Protein 1, Retinoic Acid Early Transcript 1I	The protein encoded by this gene is a ligand of natural killer group 2, member D (NKG2D), an immune system-activating receptor on NK cells and T-cells. Binding of the encoded ligand to NKG2D leads to activation of several signal transduction pathways, including those of JAK2, STAT5, ERK and PI3K kinase/Akt. Also, in cytomegalovirus-infected cells, this ligand binds the UL16 glycoprotein and is pr…		Inflammation	2.1	Immune cell activation			MHC presentation, NKG2D binding, JAK2, STAT5, ERK and PI3K kinase/Akt activation
ENSMUSG00000069892	9930111J21Rik2	ENSMUST00000132768.1,ENSMUST00000093152.1,ENSMUST00000101295.8	protein_coding	0.726712	4.42368	3.40038e-08	2.66107e-05	Interferon-gamma-inducible GTPase Ifggb1 protein	The interferon-γ (IFN-γ)-inducible immunity-related GTPase (IRG), Irgm1, plays an essential role in restraining activation of the IRG pathogen resistance system	https://www.ncbi.nlm.nih.gov/pmc/articles/PMC4837601/	Inflammation	2.1	Immune cell activation		Important for degrading/limiting infections. Also helps cells recognize self vs non self membranes https://pubmed.ncbi.nlm.nih.gov/27098192/	Prevnetion of infection, distinguishing self vs foreign membranes, lysosomes
ENSMUSG00000026580	Selp	ENSMUST00000162102.1,ENSMUST00000161020.7,ENSMUST00000162746.1,ENSMUST00000160000.1,ENSMUST00000161152.7	nonsense_mediated_decay,retained_intron,protein_coding	0.937449	3.48941	9.50121e-07	0.000183806	Selectin P	Expressed on activated BEC ( from Weible-Palade bodies inside the cell to the plasma membrane with activation), leukocyte and platelet adhesion Ca2+-dependent receptor for myeloid cells that binds to carbohydrates on neutrophils and monocytes. Mediates the interaction of activated endothelial cells or platelets with leukocytes. The ligand recognized is sialyl-Lewis X. Mediates rapid rolling of le…	https://www.ncbi.nlm.nih.gov/pmc/articles/PMC2829030/	Inflammation	2.1	Leukocyte adhesion		Activated BEC- promotes BBB breakdown	Leukocyte attachment to endothelial cells, inflamamtion
ENSMUSG00000024164	C3	ENSMUST00000176457.1,ENSMUST00000177425.1,ENSMUST00000024988.14,ENSMUST00000177046.1	processed_transcript,protein_coding	0.709372	3.97677	1.07974e-05	0.000962942	Complement component 3	Complement component C3 plays a central role in the activation of complement system. Its activation is required for both classical and alternative complement activation pathways. The encoded preproprotein is proteolytically processed to generate alpha and beta subunits that form the mature protein, which is then further processed to generate numerous peptide products. The C3a peptide, also known …	https://academic.oup.com/innovateage/article/3/Supplement_1/S840/5618544	Inflammation	2.1	Clotting/complement/platelet			Complement, infalmmation,
ENSMUSG00000026579	F5	ENSMUST00000086040.5	protein_coding	0.745405	4.30984	1.22204e-06	0.000219712	Coagulation factor V	In contrast to most other coagulation factors, it is not enzymatically active but functions as a cofactorFactor V (FV) is a procoagulant molecule that interacts with other clotting proteins including activated factor X and PT to increase the production of thrombin, the key hemostatic enzyme that converts soluble fibrinogen to a fibrin clo	https://www.ncbi.nlm.nih.gov/pubmed/15147718	Inflammation	2.1	Clotting/complement/platelet		Protomtes fibrin clot formation, can also inhibit depending on context	Clotting factor, thrombin activation
ENSMUSG00000089736	Tgfbr3l	ENSMUST00000209051.1,ENSMUST00000124750.1,ENSMUST00000208029.1,ENSMUST00000142865.1,ENSMUST00000110993.1	processed_transcript,retained_intron,protein_coding	-0.631081	1.96539	4.14017e-06	0.000502953	Transforming Growth Factor Beta Receptor 3 Like, Betaglycan	Betaglycan also known as Transforming growth factor beta receptor III (TGFBR3), is a cell-surface chondroitin sulfate / heparan sulfate proteoglycan >300 kDa in molecular weight. Betaglycan binds to various members of the TGF-beta superfamily of ligands via its core protein, and bFGF via its heparan sulfate chains. It is not involved directly in TGF-beta signal transduction but by binding to vari…	https://academic.oup.com/cardiovascres/article/65/3/599/354983 https://translational-medicine.biomedcentral.com/articles/10.1186/1479-5876-10-183	Inflammation	2.2	Chemo/cyto		An important function of betaglycan is to facilitate the binding of TGF-β to TβR-II. This is particularly important for TGF-β2, which has only low intrinsic affinity for TβR-II.	TGFB2 signaling, linked to everything, RHOA, MAPK
ENSMUSG00000078719	Msmp	ENSMUST00000107884.2	protein_coding	-0.457378	3.0244	0.000255087	0.00904232	Microseminoprotein, Prostate Associated, PC3-Secreted Microprotein	This gene encodes a member of the beta-microseminoprotein family. Members of this protein family contain ten conserved cysteine residues that form intra-molecular disulfide bonds. The encoded protein may play a role in prostate cancer tumorigenesis. [provided by RefSeq, Jan 2011]	https://pubmed.ncbi.nlm.nih.gov/31813573/?from_term=Msmp&from_sort=pubdate&from_pos=2	Inflammation	2.2	Chemo/cyto		PC3-secreted microprotein (PSMP)/microseminoprotein (MSMP) is a novel chemotactic cytokine and its receptor is CCR2.	Chemokine, CCL2
ENSMUSG00000028602	Tnfrsf8	ENSMUST00000030339.12,ENSMUST00000123027.1	nonsense_mediated_decay,protein_coding	-0.342254	6.13278	3.34945e-06	0.000445418	TNF Receptor Superfamily Member 8, CD30	The protein encoded by this gene is a member of the TNF-receptor superfamily. This receptor is expressed by activated, but not by resting, T and B cells. TRAF2 and TRAF5 can interact with this receptor, and mediate the signal transduction that leads to the activation of NF-kappaB. This receptor is a positive regulator of apoptosis, and also has been shown to limit the proliferative potential of a…	https://www.nature.com/articles/bcj201785	Inflammation	2.2	Chemo/cyto		Weird, is more expressed on immune and cancer cells. Its ligand is CD30L, indicative of activated endothelium?	NFkb signaling,
ENSMUSG00000032578	Cish	ENSMUST00000168260.1,ENSMUST00000165664.1,ENSMUST00000171568.1,ENSMUST00000085102.5,ENSMUST00000167072.1	processed_transcript,protein_coding	-0.322395	4.90057	6.88847e-05	0.00356709	Cytokine Inducible SH2 Containing Protein, SOCS	The protein encoded by this gene contains a SH2 domain and a SOCS box domain. The protein thus belongs to the cytokine-induced STAT inhibitor (CIS), also known as suppressor of cytokine signaling (SOCS) or STAT-induced STAT inhibitor (SSI), protein family. CIS family members are known to be cytokine-inducible negative regulators of cytokine signaling. The expression of this gene can be induced by…		Inflammation	2.2	Chemo/cyto		Higher IP3 and DAG?	Supress inflammation, PLCg degradation
ENSMUSG00000031431	Tsc22d3	ENSMUST00000123898.1,ENSMUST00000055738.11,ENSMUST00000112995.2,ENSMUST00000133023.1,ENSMUST00000112996.8,ENSMUST00000152048.1	processed_transcript,retained_intron,protein_coding	-0.314694	7.18678	6.04033e-05	0.00322448	TSC22 Domain Family Member 3, GILZ	This gene encodes the anti-inflammatory protein glucocorticoid (GC)-induced leucine zipper. Expression of this gene stimulated by glucocorticoids and interleukin 10 and it appears to play a key role in the anti-inflammatory and immunosuppressive effects of this steroid. This protein has also been shown to inhibit pro-inflammatory molecules including nuclear factor &#954;B. Alternate splicing resu…	https://pubmed.ncbi.nlm.nih.gov/23729444/?from_term=GILZ++endothelial+cell&from_pos=1	Inflammation	2.2	Chemo/cyto			Antiinflammatory, NFKb and MAPK signaling
ENSMUSG00000044786	Zfp36	ENSMUST00000209061.1,ENSMUST00000051241.6	protein_coding	-0.283994	6.19078	1.15013e-06	0.000208451	ZFP36 Ring Finger Protein	Zinc-finger RNA-binding protein that destabilizes several cytoplasmic AU-rich element (ARE)-containing mRNA transcripts by promoting their poly(A) tail removal or deadenylation, and hence provide a mechanism for attenuating protein synthesis (PubMed:9703499, PubMed:10330172, PubMed:10751406, PubMed:11279239, PubMed:12115244, PubMed:12748283, PubMed:15187101, PubMed:15634918, PubMed:17030620, PubM…	https://pubmed.ncbi.nlm.nih.gov/23559629/	Inflammation	2.2	Chemo/cyto			Suppress inflammation, suppress HIF1a during hypoxia
ENSMUSG00000025736	Jmjd8	ENSMUST00000144589.7,ENSMUST00000026832.13,ENSMUST00000133595.7,ENSMUST00000123582.1,ENSMUST00000123692.7,ENSMUST00000152434.7,ENSMUST00000143296.1,ENSMUST00000123560.1	nonsense_mediated_decay,retained_intron,protein_coding	-0.202754	5.58899	0.000300571	0.0101427	Jumonji Domain Containing 8	Functions as a positive regulator of TNF-induced NF-kappa-B signaling (PubMed:27671354). Regulates angiogenesis and cellular metabolism through interaction with PKM (PubMed:27199445)	https://pubmed.ncbi.nlm.nih.gov/27199445/?from_term=Jmjd8+endothelial+cell&from_sort=pubdate&from_pos=2 https://pubmed.ncbi.nlm.nih.gov/27671354/?from_single_result=27671354&show_create_notification_links=False	Inflammation	2.2	Chemo/cyto		knock down upregulates COX2, upregulated in endothelial cell differentiation. Accordingly, knockdown of pyruvate kinase M2 in human umbilical vein ECs decreased endothelial sprouting in the spheroid assay. Knockdown of JMJD8 caused a reduction of EC metabolism as measured by Seahorse Bioscience extracellular flux analysis. Conversely, overexpression of JMJD8 enhanced cellular oxygen consumption r…	Histone methylation, mitochondrial function, inflammation
ENSMUSG00000028245	Nsmaf	ENSMUST00000124344.1,ENSMUST00000143983.1,ENSMUST00000156283.7,ENSMUST00000143704.7,ENSMUST00000156078.1,ENSMUST00000029910.11,ENSMUST00000156715.1,ENSMUST00000143566.7,ENSMUST00000145399.7,ENSMUST00000124656.1,ENSMUST00000149015.7	processed_transcript,retained_intron,protein_coding	-0.178478	5.89701	0.00073811	0.0194927	Neutral Sphingomyelinase Activation Associated Factor	This gene encodes a WD-repeat protein that binds the cytoplasmic sphingomyelinase activation domain of the 55kD tumor necrosis factor receptor. This protein is required for TNF-mediated activation of neutral sphingomyelinase and may play a role in regulating TNF-induced cellular responses such as inflammation. Alternative splicing results in multiple transcript variants.[provided by RefSeq, Jan 2…	https://jlb.onlinelibrary.wiley.com/doi/pdf/10.1189/jlb.0410188	Inflammation	2.2	Chemo/cyto		May explain lack of TNFa response	TNFa signaling, actin remodeling, cyokines
ENSMUSG00000030921	Trim30a	ENSMUST00000142124.1,ENSMUST00000125762.1,ENSMUST00000076922.5	processed_transcript,retained_intron,protein_coding	0.223478	5.2147	0.00104884	0.0244012	Tripartite Motif Containing 5	The protein encoded by this gene is a member of the tripartite motif (TRIM) family. The TRIM motif includes three zinc-binding domains, a RING, a B-box type 1 and a B-box type 2, and a coiled-coil region. The protein forms homo-oligomers via the coilel-coil region and localizes to cytoplasmic bodies. It appears to function as a E3 ubiquitin-ligase and ubiqutinates itself to regulate its subcellul…		Inflammation	2.2	Chemo/cyto			E3 ubiquitin ligase, inflammation, autophagy
ENSMUSG00000033060	Lmo7	ENSMUST00000159797.1,ENSMUST00000159948.7,ENSMUST00000160038.1,ENSMUST00000159769.7,ENSMUST00000100337.9,ENSMUST00000159812.1,ENSMUST00000159258.7,ENSMUST00000162091.7,ENSMUST00000159314.7,ENSMUST00000159026.7,ENSMUST00000159850.1,ENSMUST00000160876.1,ENSMUST00000159806.1,ENSMUST00000159597.7,ENSMUST00000159154.1,ENSMUST00000161668.7	nonsense_mediated_decay,processed_transcript,retained_intron,protein_coding	0.229729	6.52742	8.91331e-05	0.00429866	LIM Domain 7	This gene encodes a protein containing a calponin homology (CH) domain, a PDZ domain, and a LIM domain, and may be involved in protein-protein interactions. Several alternatively spliced transcript variants encoding different isoforms have been found for this gene, however, the full-length nature of some variants is not known. [provided by RefSeq, Jan 2009]LMO7 (LIM Domain 7) is a Protein Coding …	https://pubmed.ncbi.nlm.nih.gov/30586711/?from_term=Lmo7&from_pos=1	Inflammation	2.2	Chemo/cyto		lasma membrane, cytoskeleton and nucleus and has been shown to play roles in adherens junction assembly7, cell migration9, and gene transcription1	Negative regulator of TGFb, scaffold protein
ENSMUSG00000026072	Il1r1	ENSMUST00000114795.2,ENSMUST00000195402.1,ENSMUST00000027241.10	processed_transcript,protein_coding	0.322589	6.17337	3.61158e-07	0.000109685	Interleukin 1 Receptor Type 1	This gene encodes a cytokine receptor that belongs to the interleukin-1 receptor family. The encoded protein is a receptor for interleukin-1 alpha, interleukin-1 beta, and interleukin-1 receptor antagonist. It is an important mediator involved in many cytokine-induced immune and inflammatory responses. This gene is located in a cluster of related cytokine receptor genes on chromosome 2q12. Recept…	https://pubmed.ncbi.nlm.nih.gov/24523548/	Inflammation	2.2	Chemo/cyto		Knockdown of interleukin-1 Receptor type-1 on Endothelial Cells Attenuated Stress-Induced Neuroinflammation and Prevented Anxiety-Like Behavior	IL-1 signaling, inflammation, MAPK, NKkb
ENSMUSG00000014599	Csf1	ENSMUST00000155557.1,ENSMUST00000120243.7,ENSMUST00000014743.9,ENSMUST00000156820.1,ENSMUST00000118593.7,ENSMUST00000153114.1,ENSMUST00000120654.7	retained_intron,protein_coding	0.342712	9.55935	0.000130515	0.00570238	Colony Stimulating Factor 1	Cytokine that plays an essential role in the regulation of survival, proliferation and differentiation of hematopoietic precursor cells, especially mononuclear phagocytes, such as macrophages and monocytes. Promotes the release of proinflammatory chemokines, and thereby plays an important role in innate immunity and in inflammatory processes. Plays an important role in the regulation of osteoclas…	https://www.ncbi.nlm.nih.gov/pubmed/24019961 https://www.ncbi.nlm.nih.gov/pubmed/9012632	Inflammation	2.2	Chemo/cyto		In macrophages also promotes cholesterol efflux and metabolism decreasing the proportion of polyunsaturated esters relative to monounsaturated and saturated esters.	Monocyte proliferation, macrophage activation, LDL uptake, cholesterol metabolism
ENSMUSG00000039239	Tgfb2	ENSMUST00000195201.1,ENSMUST00000194593.1,ENSMUST00000191766.5,ENSMUST00000045288.13,ENSMUST00000193640.1,ENSMUST00000194960.1	processed_transcript,retained_intron,protein_coding	0.390852	5.67451	0.0019807	0.0378522	Transforming Growth Factor Beta 2	This gene encodes a secreted ligand of the TGF-beta (transforming growth factor-beta) superfamily of proteins. Ligands of this family bind various TGF-beta receptors leading to recruitment and activation of SMAD family transcription factors that regulate gene expression. The encoded preproprotein is proteolytically processed to generate a latency-associated peptide (LAP) and a mature peptide, and…	https://www.ncbi.nlm.nih.gov/pmc/articles/PMC5357738/ https://www.ncbi.nlm.nih.gov/pubmed/19481975 https://www.ncbi.nlm.nih.gov/pubmed/15911702	Inflammation	2.2	Chemo/cyto		In general both protective and detrimental functions have been observed	Angiognesis, barrier function, inflammation
ENSMUSG00000034947	Tmem106a	ENSMUST00000143045.7,ENSMUST00000039581.13,ENSMUST00000128614.1,ENSMUST00000107194.7,ENSMUST00000128659.1,ENSMUST00000100403.8	processed_transcript,protein_coding	0.399555	2.92785	0.000194452	0.00745033	Transmembrane Protein 106A	Activates macrophages and polarizes them into M1-like macrophages through the activation of the MAPK and NF-kappaB signaling pathway. Upon activation, upregulates the expression of CD80, CD86, CD69 and MHC II on macrophages, and induces the release of pro-inflammatory cytokines such as TNF, IL1B, IL6, CCL2 and nitric oxide (By similarity). May play a role in inhibition of proliferation and migrat…	https://pubmed.ncbi.nlm.nih.gov/26215746/?from_term=Transmembrane+Protein+106A++&from_pos=2	Inflammation	2.2	Chemo/cyto			Cytokine production, MHC, cell proliferation
ENSMUSG00000018920	Cxcl16	ENSMUST00000154475.1,ENSMUST00000126391.1,ENSMUST00000019064.8	nonsense_mediated_decay,retained_intron,protein_coding	0.44157	5.48057	9.66127e-06	0.000890819	C-X-C Motif Chemokine Ligand 16	CXCL16 (C-X-C Motif Chemokine Ligand 16) is a Protein Coding gene. Diseases associated with CXCL16 include Xanthogranulomatous Cholecystitis and Systemic Lupus Erythematosus. Among its related pathways are Signaling by GPCR and CCR5 Pathway in Macrophages. Gene Ontology (GO) annotations related to this gene include chemokine activity and low-density lipoprotein particle receptor activity. Acts as…	https://pubmed.ncbi.nlm.nih.gov/23633118/	Inflammation	2.2	Chemo/cyto		Inflammatory response to artherosclerosis	Leukocyte adhesion, macrophage infiltration, calcium mobilization, maybe lipoprotein-arthersclerosis. angiotensin
ENSMUSG00000035385	Ccl2	ENSMUST00000124479.1,ENSMUST00000000193.5	retained_intron,protein_coding	0.549836	7.52304	0.000276921	0.00958506	C-C Motif Chemokine Ligand 2	This gene is one of several cytokine genes clustered on the q-arm of chromosome 17. Chemokines are a superfamily of secreted proteins involved in immunoregulatory and inflammatory processes. The superfamily is divided into four subfamilies based on the arrangement of N-terminal cysteine residues of the mature peptide. This chemokine is a member of the CC subfamily which is characterized by two ad…	https://www.rndsystems.com/pathways/blood-brain-barrier-immune-cell-transmigration-ccl2-mcp-1-signaling-pathways	Inflammation	2.2	Chemo/cyto		see signaling map- RhoA, IP3/DAG	Chemokine, monocytes, calcium, RhoA
ENSMUSG00000029380	Cxcl1	ENSMUST00000031327.8,ENSMUST00000201245.1	retained_intron,protein_coding	0.643391	5.28679	6.97518e-05	0.00359051	The chemokine (C-X-C motif) ligand 1	Chemokine, also modualtes angiogensis	https://www.nature.com/articles/labinvest201371 https://www.nature.com/articles/labinvest201371	Inflammation	2.2	Chemo/cyto			Chemoattractant for neutrophils, reduces endothelial cell viability, proliferation and promotes angiogenesis
ENSMUSG00000058427	Cxcl2	ENSMUST00000200919.1,ENSMUST00000200681.3,ENSMUST00000075433.7,ENSMUST00000202317.1	retained_intron,protein_coding	0.690616	2.61354	5.84343e-05	0.00314928	C-X-C Motif Chemokine Ligand 2	CXCL2 (C-X-C Motif Chemokine Ligand 2) is a Protein Coding gene. Diseases associated with CXCL2 include Peritonitis and Pneumonia. Among its related pathways are Signaling by GPCR and CCR5 Pathway in Macrophages. Gene Ontology (GO) annotations related to this gene include chemokine activity and CXCR chemokine receptor binding. An important paralog of this gene is CXCL1.	https://www.jimmunol.org/content/194/1_Supplement/49.7	Inflammation	2.2	Chemo/cyto			Neutrophil chemoattractant
ENSMUSG00000057596	Trim30d	ENSMUST00000071069.12,ENSMUST00000033211.13,ENSMUST00000141063.1	protein_coding	0.838791	2.08302	1.45948e-07	6.18876e-05	tripartite motif-containing 30A	ans-acting factor that regulates gene expression of interleukin 2 receptor alpha chain. May affect IL2R-alpha expression through cis-acting negative regulatory elements or through competition with proteins that bind to enhancer or activator sequences. Negatively regulates Toll-like receptor (TLR)-mediated activation of NFKB by promoting degradation of TAB2 and TAB3 and preventing TRAF6 autoubiqui…		Inflammation	2.2	Chemo/cyto		Inhibit inflammation?	Inflammation, inflammasome, IL-2
ENSMUSG00000021091	Serpina3n	ENSMUST00000021506.5	protein_coding	1.53016	0.189859	0.00131678	0.0286757	Serpin Family A Member 3	The protein encoded by this gene is a plasma protease inhibitor and member of the serine protease inhibitor class. Polymorphisms in this protein appear to be tissue specific and influence protease targeting. Variations in this protein's sequence have been implicated in Alzheimer's disease, and deficiency of this protein has been associated with liver disease. Mutations have been identified in pat…	https://www.ncbi.nlm.nih.gov/pubmed/31790278 https://www.ncbi.nlm.nih.gov/pmc/articles/PMC3794555/#:~:text=Alpha%201%2DAntichymotrypsin%2C%20an%20Inflammatory,Jun%20N%2DTerminal%20Kinase%20Activation&text=Int%20J%20Alzheimers%20Dis.	Inflammation	2.2	Chemo/cyto		accelerates wound healing through increase cell proliferation,vascularization, cell differentiation, and collagen deposition. Although its physiological function is unclear, it can inhibit neutrophil cathepsin G and mast cell chymase, both of which can convert angiotensin-1 to the active angiotensin-2.	Complement cascade, Collagen deposition, hypertension
ENSMUSG00000032548	Slco2a1	ENSMUST00000190892.1,ENSMUST00000035148.12,ENSMUST00000188664.1,ENSMUST00000185215.1	nonsense_mediated_decay,processed_transcript,retained_intron,protein_coding	-0.399187	5.09945	0.00144922	0.0306107	Solute Carrier Organic Anion Transporter Family Member 2A1	Transepithelial transport of prostaglandins, and the clearance of prostaglandins from the circulation.	https://pubmed.ncbi.nlm.nih.gov/32184453/	Inflammation	2.2	AA		Prostaglandin transport, not sure if it is bidirectional or an influx trasnporter	Prostaglandins
ENSMUSG00000032842	Abcc10	ENSMUST00000047970.13,ENSMUST00000167360.7,ENSMUST00000165733.1,ENSMUST00000095261.9,ENSMUST00000171584.1,ENSMUST00000170168.1,ENSMUST00000168490.1	nonsense_mediated_decay,processed_transcript,retained_intron,protein_coding	-0.353725	3.72887	0.000164431	0.00665842	ATP Binding Cassette Subfamily C Member 10	24103790 - leukotriene C4 substrate?		Inflammation	2.2	AA			Leukotriene
ENSMUSG00000040105	Plpp6	ENSMUST00000045674.3	protein_coding	-0.321238	6.98897	4.10444e-06	0.000502953	Phospholipid Phosphatase 6	Phosphatase that dephosphorylates presqualene diphosphate (PSDP) into presqualene monophosphate (PSMP), suggesting that it may be indirectly involved in innate immunity. PSDP is a bioactive lipid that rapidly remodels to presqualene monophosphate PSMP upon cell activation. Displays diphosphate phosphatase activity with a substrate preference for PSDP > FDP > phosphatidic acid.	https://www.ncbi.nlm.nih.gov/pmc/articles/PMC2765513/ https://pubmed.ncbi.nlm.nih.gov/16990613/?from_term=resqualene+monophosphate+%28PSMP&from_pos=2	Inflammation	2.2	AA		PSDP, but not PSMP, directly inhibits phospholipase D, phosphoinositol-3 kinase, and superoxide anion generation. LXs block PSDP turnover in neutrophil membranes to prevent proinflammatory responses. Hence, LX and polyisoprenyl phosphate signaling provide a counter-regulatory circuit to promote resolution of acute lung inflammation. LXA(4) and PSDP mimetics have been prepared with potent protecti…	Lipid mediators, PSDP/PSMP, leukotrienes
ENSMUSG00000030737	Slco2b1	ENSMUST00000107088.7,ENSMUST00000137914.1,ENSMUST00000208225.1,ENSMUST00000154295.1,ENSMUST00000032985.10,ENSMUST00000208713.1,ENSMUST00000145381.7,ENSMUST00000207090.1,ENSMUST00000107086.8	protein_coding	-0.278638	9.24273	0.000143358	0.00605397	Solute Carrier Organic Anion Transporter Family Member 2B1, OATP-B	Mediates the Na(+)-independent transport of organic anions such as taurocholate, the prostaglandins PGD2, PGE1, PGE2, leukotriene C4, thromboxane B2 and iloprost. SO2B1_HUMAN,O94956	https://www.ncbi.nlm.nih.gov/pmc/articles/PMC3257355/	Inflammation	2.2	AA		Check if bidirectional because this seems to move things inside the cell	Aracadonic acid, prostaglandins, leukotrienes
ENSMUSG00000027864	Ptgfrn	ENSMUST00000200065.1,ENSMUST00000102694.3,ENSMUST00000198037.1	processed_transcript,retained_intron,protein_coding	0.232323	7.85341	9.92706e-05	0.00466738	Prostaglandin F2 Receptor Inhibitor	Inhibits the binding of prostaglandin F2-alpha (PGF2-alpha) to its specific FP receptor, by decreasing the receptor number rather than the affinity constant. Functional coupling with the prostaglandin F2-alpha receptor seems to occur (By similarity). In myoblasts, associates with tetraspanins CD9 and CD81 to prevent myotube fusion during muscle regeneration (By similarity). FPRP_HUMAN,Q9P2B2		Inflammation	2.2	AA		Inhibit PTGFR activity, may be related to lipoprotein metabolism	Prostaglandin F2 receptor signaling
ENSMUSG00000056220	Pla2g4a	ENSMUST00000190507.1,ENSMUST00000111926.8,ENSMUST00000134676.1,ENSMUST00000155438.1,ENSMUST00000070200.14,ENSMUST00000142040.1	processed_transcript,retained_intron,protein_coding	0.410763	3.90309	1.51605e-05	0.00127417	Phospholipase A2 Group IVA	This gene encodes a member of the cytosolic phospholipase A2 group IV family. The enzyme catalyzes the hydrolysis of membrane phospholipids to release arachidonic acid which is subsequently metabolized into eicosanoids. Eicosanoids, including prostaglandins and leukotrienes, are lipid-based cellular hormones that regulate hemodynamics, inflammatory responses, and other intracellular pathways. The…		Inflammation	2.2	AA		Calcium activated also related to ICAM1	Arachadonic acid, calcium
ENSMUSG00000054580	Pla2r1	ENSMUST00000128208.7,ENSMUST00000136034.1,ENSMUST00000112525.4,ENSMUST00000126327.1,ENSMUST00000150373.1,ENSMUST00000134583.1	processed_transcript,retained_intron,protein_coding	0.522331	3.81839	7.75686e-07	0.000167623	Phospholipase A2 Receptor 1	This gene represents a phospholipase A2 receptor. The encoded protein likely exists as both a transmembrane form and a soluble form. The transmembrane receptor may play a role in clearance of phospholipase A2, thereby inhibiting its action. Polymorphisms at this locus have been associated with susceptibility to idiopathic membranous nephropathy. Alternatively spliced transcript variants encoding …		Inflammation	2.2	AA		This could clear phospholipase A2, or increase it	Arachadonic acid metabolism, phospholipase A2
ENSMUSG00000000320	Alox12	ENSMUST00000108574.2,ENSMUST00000000329.8	protein_coding	0.550854	1.48844	0.000400235	0.0125803	Arachidonate 12-Lipoxygenase, 12S Type	The encoded enzyme acts on different polyunsaturated fatty acid substrates to generate bioactive lipid mediators including eicosanoids and lipoxins. Catalyzes the regio and stereo-specific incorporation of a single molecule of dioxygen into free and esterified polyunsaturated fatty acids generating lipid hydroperoxides that can be further reduced to the corresponding hydroxy species (PubMed:17493…	https://www.ncbi.nlm.nih.gov/pmc/articles/PMC3012140/	Inflammation	2.2	AA		A selective but not totally specific inhibitor of ALOX12 reduced the growth response of cultured human endothelial cells to basic fibroblast growth factor and vascular endothelial growth factor (VEGF); 30962574	Arachadonic acid metabolism, production of 12S-HPETE, lipoxin A4
ENSMUSG00000070056	Mfhas1	ENSMUST00000154989.1,ENSMUST00000209953.1,ENSMUST00000037666.5	processed_transcript,protein_coding	-0.238492	6.42612	2.56208e-05	0.00177716	Malignant Fibrous Histiocytoma Amplified Sequence 1	Probable GTP-binding protein (PubMed:24286120). Functions in innate immunity and more specifically the inflammatory response as a regulator of the Toll-like receptor TLR2 and TLR4 signaling pathways (PubMed:26599367, PubMed:28471450, PubMed:28609714). Negatively regulates the part of the TLR4 signaling pathway that leads to the activation of the transcription factor AP-1. By retaining the phospha…	https://pubmed.ncbi.nlm.nih.gov/29168081/	Inflammation	2.2	TLR		Linked to HO	TLR4 inhibition, retains PP2A in cytoplasm to stop it signaling
ENSMUSG00000032497	Lrrfip2	ENSMUST00000035078.12,ENSMUST00000197540.4,ENSMUST00000098340.6,ENSMUST00000197241.4,ENSMUST00000200094.4,ENSMUST00000199711.1,ENSMUST00000196703.4,ENSMUST00000198127.1,ENSMUST00000217117.1,ENSMUST00000196981.4,ENSMUST00000216430.1,ENSMUST00000197256.4,ENSMUST00000196906.1,ENSMUST00000217341.1,ENSMUST00000198986.1	nonsense_mediated_decay,processed_transcript,retained_intron,protein_coding	-0.187977	5.79971	0.000104352	0.00483546	LRR Binding FLII Interacting Protein 2	The protein encoded by this gene, along with MYD88, binds to the cytosolic tail of toll-like receptor 4 (TLR4), which results in activation of nuclear factor kappa B signaling. The ubiquitin-like protein FAT10 prevents the interaction of the encoded protein and TLR4, thereby inactivating the nuclear factor kappa B signaling pathway. In addition, this protein can downregulate the NLRP3 inflammasom…		Inflammation	2.2	TLR		we observed that Ca(2+)/FliI-dependent severing of F-actin suppresses F-actin/FliI/LRRFIP2-dependent NLRP3 inflammasome inhibition leading to increase IL-1β production.	Negative regualtor of TLR4 signaling, inhbits the inflammasome, activated by F-actin
ENSMUSG00000015305	Sash1	ENSMUST00000015449.5,ENSMUST00000212869.1,ENSMUST00000213032.1,ENSMUST00000212553.1	retained_intron,protein_coding	-0.164554	8.64975	0.000530905	0.0152773	SAM And SH3 Domain Containing 1	This gene encodes a scaffold protein involved in the TLR4 signaling pathway that may stimulate cytokine production and endothelial cell migration in response to invading pathogens. The encoded protein has also been described as a potential tumor suppressor that may negatively regulate proliferation, apoptosis, and invasion of cancer cells, and reduced expression of this gene has been observed in …	https://www.jimmunol.org/content/191/2/892	Inflammation	2.2	TLR		Weird as is a TLR4 scaffold, but data suggests higher TLR4, increases cell migration We show that Sash1 interacts with β-arrestin 1 downstream of the TLR4 pathway to activate Akt and endothelial nitric oxide synthase (eNOS) in microvascular endothelial cells.	TLR4, migration, maybe uncouples TL4 from NO?
ENSMUSG00000045078	Rnf216	ENSMUST00000198179.1,ENSMUST00000198190.4,ENSMUST00000053498.12,ENSMUST00000200607.4,ENSMUST00000200002.1,ENSMUST00000197296.4,ENSMUST00000199044.1,ENSMUST00000200430.4,ENSMUST00000197217.1	nonsense_mediated_decay,processed_transcript,retained_intron,protein_coding	-0.149594	6.20565	0.00254945	0.0450796	Ring Finger Protein 216	Isoform 1 acts as an E3 ubiquitin ligase, which accepts ubiquitin from specific E2 ubiquitin-conjugating enzymes, and then transfers it to substrates promoting their degradation by the proteasome. Promotes degradation of TRAF3, TLR4 and TLR9. Contributes to the regulation of antiviral responses. Down-regulates activation of NF-kappa-B, IRF3 activation and IFNB production. Isoform 3 inhibits TNF a…		Inflammation	2.2	TLR			Promotes degradation of TRAF3, TLR4 and TLR9
ENSMUSG00000022500	Litaf	ENSMUST00000117360.7,ENSMUST00000140170.1,ENSMUST00000162323.1,ENSMUST00000023143.13	retained_intron,protein_coding	0.230839	8.51053	0.000173765	0.00683921	Lipopolysaccharide Induced TNF Factor	Lipopolysaccharide is a potent stimulator of monocytes and macrophages, causing secretion of tumor necrosis factor-alpha (TNF-alpha) and other inflammatory mediators. This gene encodes lipopolysaccharide-induced TNF-alpha factor, which is a DNA-binding protein and can mediate the TNF-alpha expression by direct binding to the promoter region of the TNF-alpha gene. The transcription of this gene is…		Inflammation	2.2	TLR			AMPK, TNFa, leukocyte binding
ENSMUSG00000020227	Irak3	ENSMUST00000020448.10,ENSMUST00000145665.7,ENSMUST00000135106.1,ENSMUST00000140237.7,ENSMUST00000143100.1	nonsense_mediated_decay,processed_transcript,retained_intron,protein_coding	0.365718	5.60143	6.80023e-10	3.25305e-06	Interleukin 1 Receptor Associated Kinase 3	This gene encodes a member of the interleukin-1 receptor-associated kinase protein family. Members of this family are essential components of the Toll/IL-R immune signal transduction pathways. This protein is primarily expressed in monocytes and macrophages and functions as a negative regulator of Toll-like receptor signaling. Mutations in this gene are associated with a susceptibility to asthma.…		Inflammation	2.2	TLR		Endothelial repair after toll-like receptor signaling (VE cadherin)	Inhibits TLR signaling, involved in IL1 receptor signaling
ENSMUSG00000027995	Tlr2	ENSMUST00000029623.10	protein_coding	0.386799	3.33805	0.000732608	0.019418	Toll Like Receptor 2	The protein encoded by this gene is a member of the Toll-like receptor (TLR) family which plays a fundamental role in pathogen recognition and activation of innate immunity. TLRs are highly conserved from Drosophila to humans and share structural and functional similarities. This protein is a cell-surface protein that can form heterodimers with other TLR family members to recognize conserved mole…		Inflammation	2.2	TLR			TLR2, cytokines, inflammation
ENSMUSG00000051439	Cd14	ENSMUST00000061829.6	protein_coding	0.451319	5.66891	4.18461e-06	0.000505618	CD14 Molecule	The protein encoded by this gene is a surface antigen that is preferentially expressed on monocytes/macrophages. It cooperates with other proteins to mediate the innate immune response to bacterial lipopolysaccharide. Alternative splicing results in multiple transcript variants encoding the same protein. [provided by RefSeq, Mar 2010]. Coreceptor for bacterial lipopolysaccharide (PubMed:1698311, …	https://www.ncbi.nlm.nih.gov/pmc/articles/PMC2271019/	Inflammation	2.2	TLR		TLR2 - athersclerosis, hyperlipidemia	Acts as a coreceptor for TLR4, TLR2:TLR6 (diacylated lipopeptides), TLR2:TLR1 heterodimer (triacylated lipopeptides,
ENSMUSG00000022126	Acod1	ENSMUST00000022722.6	protein_coding	0.594179	2.02369	0.000609738	0.0168138	Aconitate Decarboxylase 1 (aka IRG1)	Acts as a negative regulator of the Toll-like receptors (TLRs)-mediated inflammatory innate response by stimulating the tumor necrosis factor alpha-induced protein TNFAIP3 expression via reactive oxygen species (ROS) in LPS-tolerized macrophages.	https://www.frontiersin.org/articles/10.3389/fimmu.2018.00141/full https://www.sciencedirect.com/science/article/pii/S1567576917301467?via%3Dihub	Inflammation	2.2	TLR		31333642	Suppress TLR signaling, possibly crebs cycle
ENSMUSG00000019842	Traf3ip2	ENSMUST00000156016.1,ENSMUST00000019987.6,ENSMUST00000155945.1,ENSMUST00000131629.1,ENSMUST00000129693.1	processed_transcript,retained_intron,protein_coding	0.580311	2.64207	0.000154542	0.00638452	TRAF3 Interacting Protein 2	This gene encodes a protein involved in regulating responses to cytokines by members of the Rel/NF-kappaB transcription factor family. These factors play a central role in innate immunity in response to pathogens, inflammatory signals and stress. This gene product interacts with TRAF proteins (tumor necrosis factor receptor-associated factors) and either I-kappaB kinase or MAP kinase to activate …	https://www.ncbi.nlm.nih.gov/pubmed/28971844	Inflammation	2.3	CBF		In response to high glucose induces endothelin-1 production!knockdown of TRAF3IP2 abolished ET-1-induced proinflammatory and adhesion molecule (IL-1β, TNF-α, monocyte chemoattractant protein 1, ICAM-1, VCAM-1, and E-selectin) expression and monocyte adhesion to endothelial cells.
ENSMUSG00000020681	Ace	ENSMUST00000001963.13,ENSMUST00000151657.1,ENSMUST00000001964.7,ENSMUST00000132280.7	processed_transcript,protein_coding	0.45564	10.9628	2.16278e-07	8.14052e-05	Angiotensin converin enzyme	The high density of ACE on the endothelium efficiently inactivates kinins. ACE inhibition prevents formation of Ang II, a potent vasoconstrictor with proliferative properties, and increases local concentration of bradykinin, which is a potent stimulator of the L-arginine and cyclooxygenase pathways[21]. ACE inhibition also increases production of NO, prostacyclin, and endothelium derived hyperpol…		Inflammation	2.3	CBF		The high density of ACE on the endothelium efficiently inactivates kinins. ACE inhibition prevents formation of Ang II, a potent vasoconstrictor with proliferative properties, and increases local concentration of bradykinin, which is a potent stimulator of the L-arginine and cyclooxygenase pathways[21]. ACE inhibition also increases production of NO, prostacyclin, and endothelium derived hyperpol…	Angiotensin II produciton, inactivate bradykinin, lower NO production, lower Caclium signaling, cerebral blood flow	Yes very
ENSMUSG00000028194	Ddah1	ENSMUST00000120310.1,ENSMUST00000127193.1,ENSMUST00000029845.14	processed_transcript,protein_coding	0.392211	7.40992	3.09071e-05	0.00200174	Dimethylarginine Dimethylaminohydrolase 1	This gene belongs to the dimethylarginine dimethylaminohydrolase (DDAH) gene family. The encoded enzyme plays a role in nitric oxide generation by regulating cellular concentrations of methylarginines, which in turn inhibit nitric oxide synthase activity. ydrolyzes N(G),N(G)-dimethyl-L-arginine (ADMA) and N(G)-monomethyl-L-arginine (MMA) which act as inhibitors of NOS. Has therefore a role in the…	https://jcs.biologists.org/content/120/6/929	Inflammation	2.3	CBF	Nitric oxide	Inhibit NO production,. The activity of DDAH is impaired by oxidative stress, permitting ADMA to accumulate, so less ROS?	Inhibit NO production, upregulated in cancer,	Y very for NO, there are inhibitors of this too
ENSMUSG00000017446	C1qtnf1	ENSMUST00000124861.1,ENSMUST00000017590.8,ENSMUST00000133558.2,ENSMUST00000106286.2	protein_coding	0.344116	4.84083	0.000948442	0.0230755	C1q And TNF Related 1	CTRP1 (Complement C1q tumor necrosis factor-related protein 1) is a member of the CTRP superfamily and is localized to human chromosome 17. It is a 32 kDa secreted glycoprotein comprised of 281 amino acids encoded by the human gene C1QTN1. This protein is a highly conserved paralogue of adiponectin, containing a cluster of collagenlike repeats, a C-terminal globular ‘C1q-like’ domain and an N-ter…	https://www.ncbi.nlm.nih.gov/pubmed/16680076	Inflammation	2.3	CBF		Stimulates aldosterone production - hypertension, imparied endothelial cell fucntion, electrolyte balance, VCAM levels	Aldosterone production, inflammation, hypertension
ENSMUSG00000029007	Agtrap	ENSMUST00000030865.8,ENSMUST00000137393.1,ENSMUST00000152323.1	processed_transcript,retained_intron,protein_coding	0.214921	5.55383	0.00213007	0.0397932	Angiotensin II Receptor Associated Protein	interacts with the angiotensin II type I receptor and negatively regulates angiotensin II signaling.		Inflammation	2.3	CBF			Inhibit angiotensin type I receptor signaling
ENSMUSG00000057530	Ece1	ENSMUST00000129607.1,ENSMUST00000102518.9,ENSMUST00000151110.3,ENSMUST00000130407.2	processed_transcript,protein_coding	0.198648	10.961	9.82648e-05	0.00462977	Endothelin Converting Enzyme 1	proteolytic processing of endothelin precursors to biologically active peptides	https://www.ncbi.nlm.nih.gov/pubmed/16787211	Inflammation	2.3	CBF		Endothelin - vasocontrction, enhanced collagen production Endothelin-1 (ET-1) is a vasoconstrictor secreted by endothelial cells, which acts as the natural counterpart of the vasodilator nitric oxide (NO). ET-1 contributes to vascular tone and regulates cell proliferation through activation of ETA and ETB receptors. Physical factors such as shear stress, or stimuli including thrombin, epinephrine…	Endothelin, hypertension, insulin resistance
ENSMUSG00000014496	Ankrd28	ENSMUST00000014640.7	protein_coding	0.174613	6.10396	7.60908e-05	0.00381711	Serine/Threonine-Protein Phosphatase 6 Regulatory Ankyrin Repeat Subunit A	Putative regulatory subunit of protein phosphatase 6 (PP6) that may be involved in the recognition of phosphoprotein substrates. Selectively inhibits the phosphatase activity of PPP1C.	https://www.researchgate.net/publication/315323891_Interplay_of_myosin_phosphatase_and_protein_phosphatase-2A_in_the_regulation_of_endothelial_nitric-oxide_synthase_phosphorylation_and_nitric_oxide_production	Inflammation	2.3	CBF	Nitric oxide	PP1 is important for enos function,	PP1, enos,	Y enos
ENSMUSG00000027931	Npr1	ENSMUST00000124760.1,ENSMUST00000029540.12,ENSMUST00000142243.1,ENSMUST00000152510.1,ENSMUST00000146991.1	nonsense_mediated_decay,processed_transcript,retained_intron,protein_coding	-0.166284	7.17773	0.000541428	0.0155007	Natriuretic Peptide Receptor 1	Receptor for the atrial natriuretic peptide NPPA/ANP and the brain natriuretic peptide NPPB/BNP which are potent vasoactive hormones playing a key role in cardiovascular homeostasis. Has guanylate cyclase activity upon binding of the ligand. Guanylyl cyclases, catalyzing the production of cGMP from GTP, are classified as soluble and membrane forms (Garbers and Lowe, 1994 [PubMed 7982997]). The me…		Inflammation	2.3	CBF			Atrial natriuretic peptode signaling, cGMP,
ENSMUSG00000001240	Ramp2	ENSMUST00000151830.1,ENSMUST00000149006.1,ENSMUST00000107282.3,ENSMUST00000138229.1,ENSMUST00000128260.8,ENSMUST00000122006.7,ENSMUST00000149585.7,ENSMUST00000129680.7	nonsense_mediated_decay,retained_intron,protein_coding	-0.206114	8.75378	0.000490085	0.0144471	Receptor Activity Modifying Protein 2	inolved in core glycosylation and transportation of adrenomedullin receptor to the cell surface; adrenomedullin reduces oxidative stress	https://www.ncbi.nlm.nih.gov/pmc/articles/PMC2147670/; https://www.ncbi.nlm.nih.gov/pubmed/23355623; https://onlinelibrary.wiley.com/doi/full/10.1002/ijc.11663;https://www.ahajournals.org/doi/full/10.1161/01.ATV.0000184759.91369.f8 https://www.ncbi.nlm.nih.gov/pubmed/23355623	Inflammation	2.3	CBF		GPCR modulator "essential" for angioenensis and vascular integrity	NO production, vasodilation, endothelial cell integrety
ENSMUSG00000024042	Sik1	ENSMUST00000024839.4	protein_coding	-0.219012	8.6925	2.89679e-05	0.00192831	Salt Inducible Kinase 1	Serine/threonine-protein kinase involved in various processes such as cell cycle regulation, gluconeogenesis and lipogenesis regulation, muscle growth and differentiation and tumor suppression. Phosphorylates HDAC4, HDAC5, PPME1, SREBF1, CRTC1/TORC1. Inhibits CREB activity by phosphorylating and inhibiting activity of TORCs, the CREB-specific coactivators, like CRTC2/TORC2 and CRTC3/TORC3 in resp…	https://www.ncbi.nlm.nih.gov/pubmed/22045124; https://www.ncbi.nlm.nih.gov/pubmed/25556206	Inflammation	2.3	CBF		Higher collagen production, TGFbeta, NA+/K+ ATPase, cerebral blood flow	Higher collagen production, TGFbeta, NA+/K+ ATPase, cerebral blood flow
ENSMUSG00000028978	Nos3	ENSMUST00000115090.5,ENSMUST00000030834.6	protein_coding	-0.236082	9.43751	0.0024371	0.0436773	Nitric Oxide Synthase 3 (eNOS)	Produces nitric oxide (NO) which is implicated in vascular smooth muscle relaxation through a cGMP-mediated signal transduction pathway. NO mediates vascular endothelial growth factor (VEGF)-induced angiogenesis in coronary vessels and promotes blood clotting through the activation of platelets.	https://www.ahajournals.org/doi/full/10.1161/circulationaha.105.602532	Inflammation	2.3	CBF	Nitric oxide	eNOS - everything. inhibits inflammation, apoE promotes enos: https://www.ncbi.nlm.nih.gov/pmc/articles/PMC3740794/ via cav1	eNOS, CBF, inflamamtion, endothelial cell function, lipoprotein, apoE, Cav1	Yes, linked to everything
ENSMUSG00000039911	Spsb1	ENSMUST00000156451.1,ENSMUST00000149743.1,ENSMUST00000167342.1,ENSMUST00000149360.1,ENSMUST00000105685.1,ENSMUST00000105684.1,ENSMUST00000156897.1,ENSMUST00000125135.1,ENSMUST00000135896.1,ENSMUST00000038562.8	processed_transcript,protein_coding	-0.24364	6.26016	0.000650258	0.0176283	SplA/Ryanodine Receptor Domain And SOCS Box Containing 1	Substrate recognition component of a SCF-like ECS (Elongin BC-CUL2/5-SOCS-box protein) E3 ubiquitin-protein ligase complex which mediates the ubiquitination and subsequent proteasomal degradation of target proteins (PubMed:15601820, PubMed:21199876). Negatively regulates nitric oxide (NO) production and limits cellular toxicity in activated macrophages by mediating the ubiquitination and proteaso…	https://pubmed.ncbi.nlm.nih.gov/31607207/?from_term=Spsb1+&from_pos=4 https://pubmed.ncbi.nlm.nih.gov/21876038/?from_term=Spsb1+&from_pos=6	Inflammation	2.3	CBF	Nitric oxide		ubiquitination, lysosomal degradtion of NOS2 AND REV-ERBA, tlr4
ENSMUSG00000020826	Nos2	ENSMUST00000018610.6,ENSMUST00000214397.1,ENSMUST00000208783.1	processed_transcript,protein_coding	-0.316361	5.90604	0.000766535	0.0199562	Nitric Oxide Synthase 2, inducible NOS	Produces nitric oxide (NO) which is a messenger molecule with diverse functions throughout the body (PubMed:7531687, PubMed:7544004). In macrophages, NO mediates tumoricidal and bactericidal actions. Also has nitrosylase activity and mediates cysteine S-nitrosylation of cytoplasmic target proteins such PTGS2/COX2 (By similarity). As component of the iNOS-S100A8/9 transnitrosylase complex involved…		Inflammation	2.3	CBF	Nitric oxide		eNOS, CBF, inflamamtion, endothelial cell function, lipoprotein, apoE, Cav1	NOS - everything. inhibits inflammation, metabolism
ENSMUSG00000041046	Ramp3	ENSMUST00000045374.7,ENSMUST00000139540.1	processed_transcript,protein_coding	-0.447043	3.76341	0.000517877	0.0150178	Receptor Activity Modifying Protein 3, Calcitonin Receptor-Like Receptor Activity Modifying Protein 3	The protein encoded by this gene is a member of the RAMP family of single-transmembrane-domain proteins, called receptor (calcitonin) activity modifying proteins (RAMPs). RAMPs are type I transmembrane proteins with an extracellular N terminus and a cytoplasmic C terminus. RAMPs are required to transport calcitonin-receptor-like receptor (CRLR) to the plasma membrane. CRLR, a receptor with seven …		Inflammation	2.3	CBF	Adrenomodulin	CRLR functions as an adrenomedullin receptor.	Adrenomodulin signaling, calcitonin-receptor-like receptor
ENSMUSG00000022122	Ednrb	ENSMUST00000172237.1,ENSMUST00000022718.9	protein_coding	-0.487118	5.61422	0.000898693	0.0222047	Endothelin Receptor Type B	The protein encoded by this gene is a G protein-coupled receptor which activates a phosphatidylinositol-calcium second messenger system. Its ligand, endothelin, consists of a family of three potent vasoactive peptides: ET1, ET2, and ET3. Studies suggest that the multigenic disorder, Hirschsprung disease type 2, is due to mutations in the endothelin receptor type B gene. Alternative splicing and t…	https://www.sciencedirect.com/science/article/pii/S0006295212002365?via%3Dihub	Inflammation	2.3	CBF		Multiple functions; vasodilation, calcium, nitric oxuide, PGI2, COX2	Endothelin,vasodilation, calcium, nitric oxide,
ENSMUSG00000022206	Npr3	ENSMUST00000066529.3	protein_coding	-0.554823	6.46969	3.58273e-06	0.000468129	Natriuretic Peptide Receptor 3	This gene encodes one of three natriuretic peptide receptors. Natriutetic peptides are small peptides which regulate blood volume and pressure, pulmonary hypertension, and cardiac function as well as some metabolic and growth processes. The product of this gene encodes a natriuretic peptide receptor responsible for clearing circulating and extracellular natriuretic peptides through endocytosis of…		Inflammation	2.3	CBF		NPR3 is the only natriuretic peptide receptor that does not have a cytoplasmic guanylate cyclase catalytic domain.3 Its primary function seems to be clearance of natriuretic peptides by a process of internalization and degradation.	Blood pressure regulation,
ENSMUSG00000030513	Pcsk6	ENSMUST00000098391.10,ENSMUST00000177369.1,ENSMUST00000055576.11,ENSMUST00000176209.1,ENSMUST00000176199.7,ENSMUST00000177272.1	retained_intron,protein_coding	-0.702897	1.835	8.39037e-05	0.00412615	Proprotein Convertase Subtilisin/Kexin Type 6	This gene encodes a member of the subtilisin-like proprotein convertase family, which includes proteases that process protein and peptide precursors trafficking through regulated or constitutive branches of the secretory pathway. The encoded protein undergoes an initial autocatalytic processing event in the ER to generate a heterodimer which exits the ER and sorts to the trans-Golgi network where…		Inflammation	2.3	CBF		Cardiovascular disease: Pcsk6 is increasing interest as indicator and factor of cardiovascular disease. Pcsk6 KO mice was shown to develop salt-sensitive hypertension due to failure of pro-corin activation crucial to atrial natriuretic peptide regulation of blood pressure.[10] A hypertensive patient was found to have a G/A mutation on the PCSK6 gene that resulted in a Asp282Asn (D282N) substituti…	TGFbeta, corin, ANP, blood pressure
ENSMUSG00000021775	Nr1d2	ENSMUST00000143308.1,ENSMUST00000090543.5	retained_intron,protein_coding	-0.535824	4.61999	2.71475e-07	9.68185e-05	Nuclear Receptor Subfamily 1 Group D Member 2, Rev-Erb-Beta	Transcriptional repressor which coordinates circadian rhythm and metabolic pathways in a heme-dependent manner. Integral component of the complex transcription machinery that governs circadian rhythmicity and forms a critical negative limb of the circadian clock by directly repressing the expression of core clock components ARNTL/BMAL1 and CLOCK. Also regulates genes involved in metabolic functio…		Signaling	3.01	NR	heme circadian rhythm	Reported as a supressor of gene activity, especially ROR activity. In hepatocytes, repressess genes involved in lipid metabolism, can also activate SREBF1 and IL-6	Lipid metabolism, inflammation, heme, circadian rhythm
ENSMUSG00000020889	Nr1d1	ENSMUST00000064941.6,ENSMUST00000139220.1	processed_transcript,protein_coding	-0.528649	6.18651	2.95916e-05	0.00195027	Nuclear Receptor Subfamily 1 Group D Member 1, Rev-ErbA-Alpha	Transcriptional repressor which coordinates circadian rhythm and metabolic pathways in a heme-dependent manner. Also regulates genes involved in metabolic functions, including lipid and bile acid metabolism, adipogenesis, gluconeogenesis and the macrophage inflammatory response. Regulates lipid metabolism by repressing the expression of APOC3 and by influencing the activity of sterol response ele…	https://journals.sagepub.com/doi/pdf/10.1621/nrs.04009	Signaling	3.01	NR	heme circadian rhythm	https://journals.plos.org/plosone/article?id=10.1371/journal.pone.0227720	Lipid metabolism, inflammation, heme, circadian rhythm
ENSMUSG00000030087	Klf15	ENSMUST00000113530.3,ENSMUST00000203039.2,ENSMUST00000032174.11,ENSMUST00000203607.1,ENSMUST00000205136.1	protein_coding	-0.502221	4.7262	7.27769e-06	0.000749307	Kruppel Like Factor 15	KLF15 (Kruppel Like Factor 15) is a Protein Coding gene. Diseases associated with KLF15 include Aortic Aneurysm and Muscle Hypertrophy. Among its related pathways are BMAL1-CLOCK,NPAS2 activates circadian gene expression and Adipogenesis. Gene Ontology (GO) annotations related to this gene include DNA-binding transcription factor activity and proximal promoter DNA-binding transcription activator …		Signaling	3.01	KLF	PPAR	Overexpression downregulated levels of MCP-1, ICAM-1, TGF-β1 and p-p65 via NRF2	Transcription factor, supress inflammation, Protects against insulin resistance, lipid metabolism, PPARa, PPARg
ENSMUSG00000028957	Per3	ENSMUST00000136398.7,ENSMUST00000138584.7,ENSMUST00000103204.10,ENSMUST00000128283.1,ENSMUST00000138052.7	nonsense_mediated_decay,processed_transcript,retained_intron,protein_coding	-0.440432	4.70705	1.49233e-06	0.000257343	Period Circadian Regulator 3	Originally described as a core component of the circadian clock. The circadian clock, an internal time-keeping system, regulates various physiological processes through the generation of approximately 24 hour circadian rhythms in gene expression, which are translated into rhythms in metabolism and behavior. It is derived from the Latin roots 'circa' (about) and 'diem' (day) and acts as an importa…	https://www.frontiersin.org/articles/10.3389/fphys.2019.00423/full	Signaling	3.01	NR	circadian rhythm	https://www.ncbi.nlm.nih.gov/pmc/articles/PMC2848505/	circadian rhythm, Lipid metabolism, inflammation, heme,
ENSMUSG00000066026	Dhrs3	ENSMUST00000171001.7,ENSMUST00000084184.6,ENSMUST00000142808.7,ENSMUST00000105744.7,ENSMUST00000128926.7,ENSMUST00000133265.1,ENSMUST00000154208.7	nonsense_mediated_decay,processed_transcript,retained_intron,protein_coding	-0.432828	3.61471	5.87286e-06	0.00064921	Dehydrogenase/Reductase 3	Short-chain dehydrogenases/reductases (SDRs), such as DHRS3, catalyze the oxidation/reduction of a wide range of substrates, including retinoids and steroids (Haeseleer and Palczewski, 2000 [PubMed 10800688]).[supplied by OMIM, Jun 2009] DHRS3 (Dehydrogenase/Reductase 3) is a Protein Coding gene. Diseases associated with DHRS3 include Amphetamine Abuse and Lipoid Proteinosis Of Urbach And Wiethe.…	https://www.ncbi.nlm.nih.gov/pmc/articles/PMC3468555/#:~:text=Both%20retinoid%20status%20and%20inflammation,%2Dretinoic%20acid%20(RA). https://www.ncbi.nlm.nih.gov/pmc/articles/PMC3931982/	Signaling	3.01	NR	Retinal-retinol-RAR-RXR	DHRS3 mRNA expression is regulated by RA in a tissue- or cell-type specific manner; the RA-induced increase in DHRS3 may contribute to retinoid storage; and a reduction of DHRS3 expression in the liver during inflammation may contribute to the perturbation of whole body vitamin A metabolism that has previously been shown to occur in conditions of inflammatory stress.	converstion of retinal to retinol, RXR induced, supressed by inflammation
ENSMUSG00000003032	Klf4	ENSMUST00000129250.1,ENSMUST00000132746.1,ENSMUST00000107619.2	protein_coding	-0.397656	5.96671	1.5246e-05	0.00127417	Kruppel Like Factor 4	This gene encodes a protein that belongs to the Kruppel family of transcription factors. The encoded zinc finger protein is required for normal development of the barrier function of skin. The encoded protein is thought to control the G1-to-S transition of the cell cycle following DNA damage by mediating the tumor suppressor gene p53. Mice lacking this gene have a normal appearance but lose weigh…	https://www.ncbi.nlm.nih.gov/pubmed/28239661 https://www.ncbi.nlm.nih.gov/pmc/articles/PMC5985828/ https://www.frontiersin.org/articles/10.3389/fphys.2019.00080/full	Signaling	3.01	KLF	PPAR	Transciption factor, invloved in determining endothelial cell identity, PPARa/y- fatty acdic oxidation, endothelial cell activation	Transcription factor, endothelial cell specialization, fatty acid oxidation, quinescence.
ENSMUSG00000058966	Fam57b	ENSMUST00000098032.10,ENSMUST00000206558.1,ENSMUST00000205324.1,ENSMUST00000079423.6,ENSMUST00000205888.1,ENSMUST00000207020.1,ENSMUST00000205722.1	processed_transcript,protein_coding	-0.383642	7.54332	1.75063e-08	1.78835e-05	TLCD3B, TLC Domain Containing 3B	This gene encodes a transmembrane protein, which may be a likely target of peroxisome proliferator-activated receptor gamma (PPAR-gamma). The product of the orthologous gene in mouse is related to obesity. Alternative splicing results in multiple transcript variants.	https://pubmed.ncbi.nlm.nih.gov/23275342/	Signaling	3.01	NR	PPAR		PPARy target, obesity
ENSMUSG00000008435	Rdh13	ENSMUST00000119485.7,ENSMUST00000128299.2,ENSMUST00000147599.7,ENSMUST00000154033.1,ENSMUST00000008579.13,ENSMUST00000138798.1	nonsense_mediated_decay,processed_transcript,retained_intron,protein_coding	-0.339717	2.75355	0.00164875	0.0335635	Retinol Dehydrogenase 13	This gene encodes a mitochondrial short-chain dehydrogenase/reductase, which catalyzes the reduction and oxidation of retinoids. The encoded enzyme may function in retinoic acid production and may also protect the mitochondria against oxidative stress. Alternatively spliced transcript variants have been described. [provided by RefSeq, Mar 2009]	https://pubmed.ncbi.nlm.nih.gov/19812372/#:~:text=Here%20we%20show%20that%20retinol,synthesis%20defaulted%20to%20basal%20levels.&text=The%20PKCdelta%2Fretinol%20complex%20signaled,pyruvate%20into%20the%20Krebs%20cycle. https://www.jbc.org/content/281/19/13001.full.pdf https://www.ncbi.nlm.nih.gov/pmc/articles/PMC4452429/	Signaling	3.01	NR	Retinal-retinol-RAR-RXR	Retinol dehydrogenase with a clear preference for NADP. Oxidizes all-trans-retinol, but seems to reduce all-trans-retinal with much higher efficiency (PubMed:18039331). Has no activity toward steroids (PubMed:18039331). protect mitochondria against oxidative stress associated with the highly reactive retinaldehyde produced from dietary beta-carotene.	Mitochondria protection against ROS, retinal metabolism
ENSMUSG00000020593	Lpin1	ENSMUST00000111067.8,ENSMUST00000067124.5	protein_coding	-0.338436	5.40195	0.000265781	0.00931781	Lipin 1	This gene encodes a magnesium-ion-dependent phosphatidic acid phosphohydrolase enzyme that catalyzes the penultimate step in triglyceride synthesis including the dephosphorylation of phosphatidic acid to yield diacylglycerol. Expression of this gene is required for adipocyte differentiation and it also functions as a nuclear transcriptional coactivator with some peroxisome proliferator-activated …	https://pubmed.ncbi.nlm.nih.gov/31492716/?from_term=Lipin+1&from_sort=pubdate&from_page=2&from_pos=10 https://www.ncbi.nlm.nih.gov/pmc/articles/PMC5471397/	Signaling	3.01	NR	PPAR		Fatty acid oxidation, PPARg, mitochondrial fission, mTOR
ENSMUSG00000037992	Rara	ENSMUST00000147985.1,ENSMUST00000107475.8,ENSMUST00000107473.2,ENSMUST00000107474.7,ENSMUST00000164748.7,ENSMUST00000139399.1,ENSMUST00000068133.9	processed_transcript,protein_coding	-0.323376	5.44835	0.00078579	0.0202058	Retinoic Acid Receptor Alpha	Receptor for retinoic acid (PubMed:19850744, PubMed:16417524, PubMed:20215566). Retinoic acid receptors bind as heterodimers to their target response elements in response to their ligands, all-trans or 9-cis retinoic acid, and regulate gene expression in various biological processes (PubMed:28167758). The RXR/RAR heterodimers bind to the retinoic acid response elements (RARE) composed of tandem 5…	https://www.ncbi.nlm.nih.gov/pubmed/28960887	Signaling	3.01	NR	Retinal-retinol-RAR-RXR	Everything	Proliferation, angiognesis, barrier funcion, lipid metabolism, apolipoprotein metbolism PPAR, RXR
ENSMUSG00000055148	Klf2	ENSMUST00000067912.7	protein_coding	-0.288298	6.45653	0.00241479	0.0435553	Kruppel Like Factor 2	This gene encodes a protein that belongs to the Kruppel family of transcription factors. The encoded zinc finger protein is expressed early in mammalian development and is found in many different cell types. The protein acts to bind the CACCC box found in the promoter of target genes to activate their transcription. It plays a role in many processes during development and disease including adipog…	https://en.wikipedia.org/wiki/KLF2	Signaling	3.01	KLF	PPAR		Flow and clilia activated, Suppress inflammation, upregulates NOS, inhibit PPAR
ENSMUSG00000001288	Rarg	ENSMUST00000130204.1,ENSMUST00000063339.13,ENSMUST00000124224.7,ENSMUST00000135466.1,ENSMUST00000043172.14,ENSMUST00000155563.1	processed_transcript,protein_coding	-0.260878	5.33291	0.000111086	0.00507427	Retinoic Acid Receptor Gamma, RARg	Receptor for retinoic acid. Retinoic acid receptors bind as heterodimers to their target response elements in response to their ligands, all-trans or 9-cis retinoic acid, and regulate gene expression in various biological processes. The RAR/RXR heterodimers bind to the retinoic acid response elements (RARE) composed of tandem 5'-AGGTCA-3' sites known as DR1-DR5. In the absence of ligand, acts mai…		Signaling	3.01	NR	Retinal-retinol-RAR-RXR		RXR, metabolism
ENSMUSG00000055866	Per2	ENSMUST00000185298.1,ENSMUST00000069620.9	processed_transcript,protein_coding	-0.249536	6.33059	0.000415434	0.0129135	Period Circadian Regulator 2	Transcriptional repressor which forms a core component of the circadian clock. The circadian clock, an internal time-keeping system, regulates various physiological processes through the generation of approximately 24 hour circadian rhythms in gene expression, which are translated into rhythms in metabolism and behavior. It is derived from the Latin roots 'circa' (about) and 'diem' (day) and acts…	https://www.google.com/search?q=Period+Circadian+Regulator+1+lipid+metabolism&rlz=1C1QJDB_enUS647US647&sxsrf=ALeKk03DEj-aCRmudkBVvc-qGPaOHy3_ww:1593386810712&source=lnms&tbm=isch&sa=X&ved=2ahUKEwj7_N221KXqAhUaB50JHdyjB_8Q_AUoAXoECAwQAw&biw=1920&bih=969#imgrc=KDC6lMWhtJninM	Signaling	3.01	NR	circadian rhythm	changes in vascular function that result from genetic disruption of discrete elements of the circadian clock.	Cell division, Signaling, circadian rhythm, metabolism
ENSMUSG00000020893	Per1	ENSMUST00000102605.2,ENSMUST00000166748.7,ENSMUST00000101004.8,ENSMUST00000142392.7,ENSMUST00000132462.7,ENSMUST00000021271.13	nonsense_mediated_decay,protein_coding	-0.241958	7.92239	8.92389e-06	0.000846226	Period Circadian Regulator 1	PER1 is a gene that plays an important role in such a circadian mechanism. Its overexpression, in particular, causes DNA-damage induced apoptosis. In addition, down-regulation of PER1 can enhance tumor growth in mammals. PER1 also interacts with proteins ATM and Chk2.	https://www.ncbi.nlm.nih.gov/pmc/articles/PMC2848505/	Signaling	3.01	NR	circadian rhythm	changes in vascular function that result from genetic disruption of discrete elements of the circadian clock.	Cell division, Signaling, circadian rhythm, metabolism
ENSMUSG00000048490	Nrip1	ENSMUST00000121927.7,ENSMUST00000145649.1,ENSMUST00000128871.1,ENSMUST00000140483.1,ENSMUST00000054178.7,ENSMUST00000141182.1	retained_intron,protein_coding	-0.235349	5.9672	7.4924e-05	0.0037741	Nuclear receptor interacting protein 1	Modulates transcriptional activation by steroid receptors such as NR3C1, NR3C2 and ESR1. Also modulates transcriptional repression by nuclear hormone receptors. Positive regulator of the circadian clock gene expression: stimulates transcription of ARNTL/BMAL1, CLOCK and CRY1 by acting as a coactivator for RORA and RORC. Involved in the regulation of ovarian function (By similarity). Plays a role …		Signaling	3.01	NR	PER		RORa activation, lipid homeostasis
ENSMUSG00000051495	Irf2bp2	ENSMUST00000054960.7	protein_coding	-0.225902	6.61394	0.000445631	0.0135157	Interferon Regulatory Factor 2 Binding Protein 2	Acts as a transcriptional corepressor in a IRF2-dependent manner; this repression is not mediated by histone deacetylase activities (PubMed:12799427). Represses the NFAT1-dependent transactivation of NFAT-responsive promoters (PubMed:21576369). Acts as a coactivator of VEGFA expression in cardiac and skeletal muscles (PubMed:20702774). Plays a role in immature B-cell differentiation (PubMed:27016…	https://pubmed.ncbi.nlm.nih.gov/32239393/?from_term=IRF2BP2&from_sort=pubdate&from_pos=2 https://www.ncbi.nlm.nih.gov/pmc/articles/PMC4862198/	Signaling	3.01	KLF	PPAR	Inflammatory cell infiltration and cytokine production, and blocked cell death after LPS treatment. Mechanistically, IRF2BP2 activated AMPK signaling in cardiomyocytes, while inhibiting AMPK activation largely reversed IRF2BP2-benefited inflammatory suppression and cell survival.	High levels suppress inflammation, AMPK, klf2		Yesy very measure NO levels reaad this: https://www.ahajournals.org/doi/full/10.1161/circresaha.116.302855
ENSMUSG00000029178	Klf3	ENSMUST00000200677.1,ENSMUST00000200384.1,ENSMUST00000200587.4,ENSMUST00000166409.5,ENSMUST00000165536.7,ENSMUST00000197879.1,ENSMUST00000198946.1,ENSMUST00000196764.1,ENSMUST00000197869.1	nonsense_mediated_decay,processed_transcript,retained_intron,protein_coding	-0.217082	7.84484	3.15741e-05	0.00202164	Kruppel Like Factor 3	transcriptional repressor shown to repress Galectin-3 (lgals3) The Lgals3 gene encodes a multifunctional β-galactoside-binding protein, galectin-3. Galectin-3 has been implicated in a broad range of biological processes from chemotaxis and inflammation to fibrosis and apoptosis.	https://www.jbc.org/content/291/31/16048.full	Signaling	3.01	KLF	PPAR	High galectin bind to basement membrane?	lipid Metabolism, basememt membrane
ENSMUSG00000068551	Zfp467	ENSMUST00000114560.7,ENSMUST00000114556.1,ENSMUST00000114561.8,ENSMUST00000101443.9,ENSMUST00000114566.7,ENSMUST00000140198.1,ENSMUST00000114559.7,ENSMUST00000114564.7,ENSMUST00000114563.7,ENSMUST00000114558.7,ENSMUST00000141449.1	nonsense_mediated_decay,retained_intron,protein_coding	-0.21433	5.25463	0.00264272	0.0460765	Zinc Finger Protein 467	ranscription factor that promotes adipocyte differentiation and suppresses osteoblast differentiation in the bone marrow. Enhances the osteoclast-supporting ability of stromal cells. Binds with STAT3 the consensus sequence 5'-CTTCTGGGAAGA-3' of the acute phase response element (APRE). Transactivates several promoters including FOS, OSM and PPARG. Recruits a histone deacetylase complex (By similar…	https://pubmed.ncbi.nlm.nih.gov/21123171/	Signaling	3.01	NR	PPAR		Transcription factor, regulates PPARG, wnt signaling
ENSMUSG00000033863	Klf9	ENSMUST00000036884.1	protein_coding	-0.211265	6.85894	0.000552369	0.015694	Kruppel Like Factor 9	The protein encoded by this gene is a transcription factor that binds to GC box elements located in the promoter		Signaling	3.01	KLF	PPAR	29416266	Angiogenesis, inflamamtion, barrier function, migration, cerebral blood flow, differentiation
ENSMUSG00000027678	Ncoa3	ENSMUST00000088095.5,ENSMUST00000109252.7,ENSMUST00000139658.1,ENSMUST00000139394.1,ENSMUST00000153507.1	processed_transcript,retained_intron,protein_coding	-0.1994	6.63778	0.00140664	0.02999	Nuclear Receptor Coactivator 3, Thyroid Hormone Receptor Activator Molecule 1	Nuclear receptor coactivator that directly binds nuclear receptors and stimulates the transcriptional activities in a hormone-dependent fashion. Plays a central role in creating a multisubunit coactivator complex, which probably acts via remodeling of chromatin. Involved in the coactivation of different nuclear receptors, such as for steroids (GR and ER), retinoids (RARs and RXRs), thyroid hormon…	https://lipidworld.biomedcentral.com/articles/10.1186/s12944-015-0126-y	Signaling	3.01	NR	co-act		Forms a signaling complex with PPARg, RXR etc, circadian rhythm
ENSMUSG00000034157	Cipc	ENSMUST00000187814.6,ENSMUST00000185434.6,ENSMUST00000186499.1,ENSMUST00000188901.1,ENSMUST00000038369.10,ENSMUST00000190588.1,ENSMUST00000191032.6,ENSMUST00000191463.1,ENSMUST00000189246.6,ENSMUST00000188046.6,ENSMUST00000185783.1	nonsense_mediated_decay,retained_intron,protein_coding	-0.184949	4.9149	0.0020738	0.0390013	CLOCK Interacting Pacemaker	Transcriptional repressor which may act as a negative-feedback regulator of CLOCK-ARNTL/BMAL1 transcriptional activity in the circadian-clock mechanism. May stimulate ARNTL/BMAL1-dependent phosphorylation of CLOCK. However, the physiogical relevance of these observations is unsure, since experiments in an animal model showed that CIPC is not critially required for basic circadian clock.		Signaling	3.01	NR	circadian rhythm		circadian-clock, negative regulatorCLOCK-ARNTL/BMAL1
ENSMUSG00000052040	Klf13	ENSMUST00000185175.1,ENSMUST00000183817.1,ENSMUST00000183907.1,ENSMUST00000063694.9	retained_intron,protein_coding	-0.176813	8.50954	0.000485786	0.0144031	Kruppel-like factor 13	Regulates the expression of the chemokine RANTES in T lymphocytes; tumor suppressor protein, also important for PPARs see other KLFs	https://www.ncbi.nlm.nih.gov/pmc/articles/PMC4410857/ https://www.jbc.org/content/early/2016/07/22/jbc.M116.725903.full.pdf	Signaling	3.01	KLF	PPAR	Transcriptonal repressor, binds to CREB/P300/P33/CBP-assocaited factor (aceylates and activates KLF)	Inflamamtion, PPAR, fatty acid metabolism
ENSMUSG00000060601	Nr1h2	ENSMUST00000208366.1,ENSMUST00000073488.11,ENSMUST00000128354.1,ENSMUST00000136611.1,ENSMUST00000167197.7,ENSMUST00000107910.7,ENSMUST00000132769.7,ENSMUST00000207737.1,ENSMUST00000141901.1,ENSMUST00000137674.2,ENSMUST00000209017.1,ENSMUST00000142298.1,ENSMUST00000128600.2,ENSMUST00000208322.1,ENSMUST00000107911.7,ENSMUST00000107912.7,ENSMUST00000123358.8,ENSMUST00000207550.1	retained_intron,protein_coding	-0.171221	6.71775	0.000236715	0.00858054	Nuclear Receptor Subfamily 1 Group H Member 2, lxrb	Regulates cholesterol uptake through MYLIP-dependent ubiquitination of LDLR, VLDLR and LRP8; DLDLR and LRP8. Interplays functionally with RORA for the regulation of genes involved in liver metabolism (By similarity). Plays an anti-inflammatory role during the hepatic acute phase response by acting as a corepressor: inhibits the hepatic acute phase response by preventing dissociation of the N-Cor …		Signaling	3.01	NR	LXR		LXR, lipid metabolism, apoE, inflammation, ROR
ENSMUSG00000005886	Ncoa2	ENSMUST00000081713.10,ENSMUST00000145280.1,ENSMUST00000143603.7,ENSMUST00000068304.12,ENSMUST00000147927.7,ENSMUST00000006037.12,ENSMUST00000139970.7,ENSMUST00000146784.1,ENSMUST00000133232.1,ENSMUST00000124088.1,ENSMUST00000185275.1	processed_transcript,retained_intron,protein_coding	-0.140132	6.68566	0.00235201	0.0426971	Nuclear Receptor Coactivator 2	The protein encoded by this gene functions as a transcriptional coactivator for nuclear hormone receptors, including steroid, thyroid, retinoid, and vitamin D receptors. The encoded protein acts as an intermediary factor for the ligand-dependent activity of these nuclear receptors, which regulate their target genes upon binding of cognate response elements. This gene has been found to be involved…		Signaling	3.01	NR	co-act		Forms a signaling complex with PPARg, RXR etc, circadian rhythm,
ENSMUSG00000032194	Kank2	ENSMUST00000034717.6,ENSMUST00000213691.1,ENSMUST00000216008.1	nonsense_mediated_decay,protein_coding	0.160414	6.49561	0.00100895	0.0238185	KN Motif And Ankyrin Repeat Domains 2	Involved in transcription regulation by sequestering in the cytoplasm nuclear receptor coactivators such as NCOA1, NCOA2 and NCOA3 (PubMed:17476305). Involved in regulation of caspase-independent apoptosis by sequestering the proapoptotic factor AIFM1 in mitochondria (PubMed:22371500). Pro-apoptotic stimuli can induce its proteasomal degradation allowing the translocation of AIFM1 to the nucleus …	https://pubmed.ncbi.nlm.nih.gov/29183992/?from_term=Kank2&from_sort=pubdate&from_pos=8	Signaling	3.01	NR			Actin binding, kinesin binding, negative regulator of vitamin D, RhoA, gene transcription
ENSMUSG00000066441	Rdh11	ENSMUST00000159500.1,ENSMUST00000085254.6,ENSMUST00000161204.7	nonsense_mediated_decay,protein_coding	0.204246	5.46609	0.000872261	0.0216865	Retinol Dehydrogenase 11	The protein encoded by this gene is an NADPH-dependent retinal reductase and a short-chain dehydrogenase/reductase. The encoded protein has no steroid dehydrogenase activity. [provided by RefSeq, Nov 2011] Retinol dehydrogenase with a clear preference for NADP. Displays high activity towards 9-cis, 11-cis and all-trans-retinol, and to a lesser extent on 13-cis-retinol (PubMed:12226107, PubMed:120…	https://dev.biologists.org/content/130/26/6465	Signaling	3.01	NR	Retinal-retinol-RAR-RXR		Retinol signaling
ENSMUSG00000039697	Ncoa7	ENSMUST00000217644.1,ENSMUST00000213836.1,ENSMUST00000217398.1,ENSMUST00000216172.1,ENSMUST00000068567.4,ENSMUST00000215926.1,ENSMUST00000213897.1,ENSMUST00000213889.1,ENSMUST00000215725.1,ENSMUST00000092610.11,ENSMUST00000215740.1,ENSMUST00000217138.1	nonsense_mediated_decay,retained_intron,protein_coding	0.245041	4.47488	0.00058309	0.0162989	Nuclear Receptor Coactivator 7	NCOA7 (Nuclear Receptor Coactivator 7) is a Protein Coding gene. Diseases associated with NCOA7 include Brugada Syndrome. Among its related pathways are Aryl Hydrocarbon Receptor and AHR Pathway. Gene Ontology (GO) annotations related to this gene include nuclear receptor transcription coactivator activity and nuclear hormone receptor binding. An important paralog of this gene is OXR1.Enhances th…	https://www.ahajournals.org/doi/abs/10.1161/circ.140.suppl_1.12966	Signaling	3.01	NR	co-act	Inflamamtion https://pubmed.ncbi.nlm.nih.gov/25861343/	Nuclear receptor cofactor, inflammation, estrogen receptors, thyroid, aryl hdrocarbon receptor
ENSMUSG00000028125	Abca4	ENSMUST00000136624.1,ENSMUST00000137616.2,ENSMUST00000197728.1,ENSMUST00000140913.7,ENSMUST00000150738.2,ENSMUST00000013995.12,ENSMUST00000136358.2,ENSMUST00000144949.1,ENSMUST00000141135.4,ENSMUST00000132199.7	processed_transcript,retained_intron,protein_coding	0.274192	5.81177	0.000150447	0.00626139	ATP Binding Cassette Subfamily A Member 4	The membrane-associated protein encoded by this gene is a member of the superfamily of ATP-binding cassette (ABC) transporters. ABC proteins transport various molecules across extra- and intracellular membranes. ABC genes are divided into seven distinct subfamilies (ABC1, MDR/TAP, MRP, ALD, OABP, GCN20, White). This protein is a member of the ABC1 subfamily. Members of the ABC1 subfamily comprise…	https://www.sciencedirect.com/science/article/pii/S1043661809000607?via%3Dihub https://www.ncbi.nlm.nih.gov/pmc/articles/PMC2930353/	Signaling	3.01	NR	Retinal-retinol-RAR-RXR	Retinal transport	Retinal transport
ENSMUSG00000029687	Ezh2	ENSMUST00000204798.2,ENSMUST00000164006.7,ENSMUST00000171614.1,ENSMUST00000114618.7,ENSMUST00000203857.1,ENSMUST00000167278.7,ENSMUST00000170327.2,ENSMUST00000170311.7,ENSMUST00000204243.2,ENSMUST00000165492.7,ENSMUST00000133043.2,ENSMUST00000092648.12,ENSMUST00000169889.2,ENSMUST00000081721.12,ENSMUST00000114616.7	nonsense_mediated_decay,processed_transcript,retained_intron,protein_coding	0.321109	4.75384	0.00098153	0.023542	Enhancer Of Zeste 2 Polycomb Repressive Complex 2 Subunit	Polycomb group (PcG) protein. Catalytic subunit of the PRC2/EED-EZH2 complex, which methylates 'Lys-9' (H3K9me) and 'Lys-27' (H3K27me) of histone H3, leading to transcriptional repression of the affected target gene. Able to mono-, di- and trimethylate 'Lys-27' of histone H3 to form H3K27me1, H3K27me2 and H3K27me3, respectively. Displays a preference for substrates with less methylation, loses ac…		Signaling	3.01	NR	circadian rhythm	suppressess per genes	polycomb, supress per genes
ENSMUSG00000030256	Bhlhe41	ENSMUST00000203949.1,ENSMUST00000111703.1,ENSMUST00000032386.10	retained_intron,protein_coding	0.538498	3.62714	9.99936e-05	0.00467205	Basic Helix-Loop-Helix Family Member E41	Transcriptional repressor involved in the regulation of the circadian rhythm by negatively regulating the activity of the clock genes and clock-controlled genes (PubMed:11278948, PubMed:14672706, PubMed:15193144, PubMed:15560782, PubMed:18411297, PubMed:19786558, PubMed:25083013). Acts as the negative limb of a novel autoregulatory feedback loop (DEC loop) which differs from the one formed by the…	https://journals.plos.org/plosbiology/article?id=10.1371/journal.pbio.2005886	Signaling	3.01	NR	PER	Suppressess PER, RXR, LXR,	Suppressess PER, RXR, LXR, circadian rhythm
ENSMUSG00000053279	Aldh1a1	ENSMUST00000087638.3	protein_coding	0.823334	2.33956	6.98164e-05	0.00359051	Aldehyde Dehydrogenase 1 Family Member A1	his gene encodes the cytosolic isozyme - second step in alcohol metabolism. Studies in mice show that through its role in retinol metabolism, this gene may also be involved in the regulation of the metabolic responses to high-fat diet.		Signaling	3.01	NR	Retinal-retinol-RAR-RXR	Produce rexenoic acid from retinal, High levels in response to ROS (lipids) activate RXR	RXR, PAR, metabolism, aldehyde detoxification
ENSMUSG00000031842	Pde4c	ENSMUST00000128685.1,ENSMUST00000149272.1,ENSMUST00000123739.7,ENSMUST00000134693.7,ENSMUST00000110095.2,ENSMUST00000034307.13	processed_transcript,retained_intron,protein_coding	-0.937301	1.16569	0.000173395	0.00683663	Phosphodiesterase 4C, CAMP-Specific 3',5'-Cyclic Phosphodiesterase 4C	Phosphodiesterases (PDEs) are a family of phosphohydrolyases that catalyze the hydrolysis of 3' cyclic phosphate bonds in adenosine and/or guanine 3',5' cyclic monophosphate (cAMP and/or cGMP). PDEs regulate the second messengers by controlling their degradation.		Signaling	3.02	cAMP	cAMP cGMP		cAMP, PKA
ENSMUSG00000032946	Rasgrp2	ENSMUST00000146831.7,ENSMUST00000150713.7,ENSMUST00000135532.1,ENSMUST00000113467.1,ENSMUST00000145611.1,ENSMUST00000133968.1,ENSMUST00000113469.2,ENSMUST00000138555.7,ENSMUST00000130480.1,ENSMUST00000123661.7,ENSMUST00000113475.7,ENSMUST00000113476.7,ENSMUST00000148906.7,ENSMUST00000127021.7,ENSMUST00000146601.7,ENSMUST00000113468.7,ENSMUST00000113471.2,ENSMUST00000122930.1,ENSMUST00000152022.7,…	nonsense_mediated_decay,processed_transcript,retained_intron,protein_coding	-0.65906	4.64982	4.24914e-06	0.000507953	RAS Guanyl Releasing Protein 2	The protein encoded by this gene is a brain-enriched nucleotide exchanged factor that contains an N-terminal GEF domain, 2 tandem repeats of EF-hand calcium-binding motifs, and a C-terminal diacylglycerol/phorbol ester-binding domain. This protein can activate small GTPases, including RAS and RAP1/RAS3. The nucleotide exchange activity of this protein can be stimulated by calcium and diacylglycer…		Signaling	3.02	cAMP	RAP		RAP1, cell adhesion, cell polarity, and organization of the cytoskeleton, calcium, cAMP
ENSMUSG00000032849	Abcc4	ENSMUST00000036554.12,ENSMUST00000166646.1	protein_coding	-0.332893	9.43027	2.7129e-06	0.000383457	ATP Binding Cassette Subfamily C Member 4	ABCC4 acts as a regulator of intracellular cyclic nucleotide levels and as a mediator of cAMP-dependent signal transduction to the nucleus.[6] MRP4/ABCC4 also transports prostaglandins, for example PGE2, out of the cell where they can bind receptors		Signaling	3.02	cAMP			Prostaglandins
ENSMUSG00000110195	Pde2a	ENSMUST00000211051.1,ENSMUST00000209537.1,ENSMUST00000211368.1,ENSMUST00000209315.1,ENSMUST00000209695.1,ENSMUST00000210364.1,ENSMUST00000166652.1,ENSMUST00000210092.1,ENSMUST00000210348.1,ENSMUST00000163751.9,ENSMUST00000210535.1,ENSMUST00000210100.1	nonsense_mediated_decay,processed_transcript,retained_intron,protein_coding	-0.303819	5.42686	0.000125504	0.00555207	Phosphodiesterase 2A, Cyclic GMP-Stimulated Phosphodiesterase	Regulates mitochondrial cAMP levels and respiration (By similarity). Involved in the regulation of mitochondria morphology/dynamics and apoptotic cell death via local modulation of cAMP/PKA signaling in the mitochondrion, including the monitoring of local cAMP levels at the outer mitochondrial membrane and of PKA-dependent phosphorylation of DNM1L (PubMed:28463107). PDE2A_HUMAN,O00408. Cyclic nuc…	https://pubmed.ncbi.nlm.nih.gov/21724846/	Signaling	3.02	cAMP	Mitochondria Camp-PKA	Read more about this one, degrades cAMP in mitochondria to limit signialing?	mitochondria, cAMP,
ENSMUSG00000049044	Rapgef4	ENSMUST00000122975.7,ENSMUST00000150234.7,ENSMUST00000028525.5,ENSMUST00000090826.11,ENSMUST00000156031.1,ENSMUST00000146970.1,ENSMUST00000149421.7,ENSMUST00000124004.1,ENSMUST00000151236.1,ENSMUST00000153887.7,ENSMUST00000102698.9	processed_transcript,protein_coding	-0.298906	5.02096	9.29346e-05	0.00444909	Rap Guanine Nucleotide Exchange Factor 4 , CAMP-Regulated Guanine Nucleotide Exchange Factor II, EPAC2	Guanine nucleotide exchange factor (GEF) for RAP1A, RAP1B and RAP2A small GTPases that is activated by binding cAMP. Seems not to activate RAB3A. Involved in cAMP-dependent, PKA-independent exocytosis through interaction with RIMS2 (By similarity). RPGF4_HUMAN,Q8WZA2	https://www.ncbi.nlm.nih.gov/pmc/articles/PMC6824682/ https://pubmed.ncbi.nlm.nih.gov/25985753/?from_term=Rapgef4+endothelial+cell&from_pos=4 https://link.springer.com/content/pdf/10.1007/s11427-015-4860-1.pdf https://www.ncbi.nlm.nih.gov/pmc/articles/PMC3331675/ https://www.ncbi.nlm.nih.gov/pmc/articles/PMC5510674/	Signaling	3.02	cAMP	RAP	Down regualted in AD, invloved in inslulin secretion, neurotransmitter release, calcium signialing, after stroke Ko of this protein makes things worse	Limit ROS in mitochondria, cAMP, PKA, signaling
ENSMUSG00000030583	Sipa1l3	ENSMUST00000182223.7,ENSMUST00000183164.1,ENSMUST00000182911.1,ENSMUST00000183330.7,ENSMUST00000182702.7,ENSMUST00000182011.7,ENSMUST00000182780.7,ENSMUST00000085809.10,ENSMUST00000182829.7,ENSMUST00000183081.1,ENSMUST00000182009.7,ENSMUST00000183096.7,ENSMUST00000182484.1,ENSMUST00000183275.1,ENSMUST00000182529.1,ENSMUST00000181975.7,ENSMUST00000182236.1,ENSMUST00000183085.1	processed_transcript,retained_intron,protein_coding	-0.276846	7.74001	3.35215e-08	2.66107e-05	Signal Induced Proliferation Associated 1 Like 3	This gene belongs to the signal induced proliferation associated 1 family of genes, which encode GTPase-activating proteins specific for the GTP-binding protein Rap1. Rap1 has been implicated in regulation of cell adhesion, cell polarity, and organization of the cytoskeleton. Like other members of the family, the protein encoded by this gene contains RapGAP and PDZ domains. In addition, this prot…	https://academic.oup.com/hmg/article/24/20/5789/557445 https://www.ncbi.nlm.nih.gov/pmc/articles/PMC5920548/ https://jcs.biologists.org/content/120/1/17 https://www.ncbi.nlm.nih.gov/pmc/articles/PMC6212855/	Signaling	3.02	cAMP	RAP	cell adhesion, cell polarity, and organization of the cytoskeleton.	RAP1, cell adhesion, cell polarity, and organization of the cytoskeleton, calcium, cAMP
ENSMUSG00000041992	Rapgef5	ENSMUST00000109691.2	protein_coding	-0.24742	7.13324	0.000693143	0.018567	Rap Guanine Nucleotide Exchange Factor 5	Members of the RAS (see HRAS; MIM 190020) subfamily of GTPases function in signal transduction as GTP/GDP-regulated switches that cycle between inactive GDP- and active GTP-bound states. Guanine nucleotide exchange factors (GEFs), such as RAPGEF5, serve as RAS activators by promoting acquisition of GTP to maintain the active GTP-bound state and are the key link between cell surface receptors and …		Signaling	3.02	cAMP	RAP		RAP1 signaling again
ENSMUSG00000019990	Pde7b	ENSMUST00000166147.1,ENSMUST00000217240.1,ENSMUST00000164195.1,ENSMUST00000170265.7,ENSMUST00000169404.7,ENSMUST00000169016.7,ENSMUST00000020165.13,ENSMUST00000170683.7	nonsense_mediated_decay,retained_intron,protein_coding	-0.228121	5.35888	0.00130979	0.0285789	Phosphodiesterase 7B	The 3',5'-cyclic nucleotides cAMP and cGMP function as second messengers in a wide variety of signal transduction pathways. 3',5'-cyclic nucleotide phosphodiesterases (PDEs) catalyze the hydrolysis of cAMP and cGMP to the corresponding 5'-monophosphates and provide a mechanism to downregulate cAMP and cGMP signaling. This gene encodes a cAMP-specific phosphodiesterase, a member of the cyclic nucl…	https://pubmed.ncbi.nlm.nih.gov/10814504/	Signaling	3.02	cAMP		cAMP metabolism - hydrolyse cAMP to AMP	cAMP, EPAC, RAP
ENSMUSG00000018428	Akap1	ENSMUST00000107903.7,ENSMUST00000107904.2,ENSMUST00000018572.10,ENSMUST00000143720.7,ENSMUST00000153787.1,ENSMUST00000153961.7	nonsense_mediated_decay,retained_intron,protein_coding	-0.217927	5.33682	0.00110761	0.0254004	A-kinase anchoring protein 1	The encoded protein binds to type I and type II regulatory subunits of PKA and anchors them to the mitochondrion. This protein is speculated to be involved in the cAMP-dependent signal transduction pathway and in directing RNA to a specific cellular compartment.	https://pubmed.ncbi.nlm.nih.gov/29335250-akap1-regulates-vascular-function-and-endothelial-cells-behavior/	Signaling	3.02	cAMP	PKA mitochondria	loss of akap1 bad for ec function; PKA ancoring to mitochondria, At the ultrastructural level, AKAP1−/− mice have smaller mitochondria and increased contacts between mitochondria and the endoplasmic reticulum in the brain. Mechanistically, deletion of AKAP1 dysregulates complex II of the electron transport chain, increases superoxide production, and impairs Ca2+ homeostasis in neurons subjected t…	PKA, mitochondria, PP2A, calcinurin, calcium dysfunction
ENSMUSG00000041354	Rgl2	ENSMUST00000174676.1,ENSMUST00000173284.1,ENSMUST00000173718.1,ENSMUST00000173502.1,ENSMUST00000174410.1,ENSMUST00000174442.1,ENSMUST00000047503.15,ENSMUST00000173379.7,ENSMUST00000172468.1,ENSMUST00000173258.1,ENSMUST00000173153.7,ENSMUST00000173266.7	processed_transcript,retained_intron,protein_coding	-0.170945	7.32443	0.000421418	0.0130147	Ral Guanine Nucleotide Dissociation Stimulator Like 2	Probable guanine nucleotide exchange factor. Putative effector of Ras and/or Rap. Associates with the GTP-bound form of Rap 1A and H-Ras in vitro (By similarity).		Signaling	3.02	cAMP	RAP		Ras, RAP, gef
ENSMUSG00000022469	Rapgef3	ENSMUST00000134885.2,ENSMUST00000149419.8,ENSMUST00000126854.8,ENSMUST00000135080.1,ENSMUST00000146214.2,ENSMUST00000134371.2,ENSMUST00000153464.8,ENSMUST00000123397.7,ENSMUST00000155810.1,ENSMUST00000146620.1,ENSMUST00000128775.8,ENSMUST00000175894.7,ENSMUST00000142196.1,ENSMUST00000177352.7,ENSMUST00000125002.7,ENSMUST00000129223.8,ENSMUST00000153241.7	nonsense_mediated_decay,processed_transcript,retained_intron,protein_coding	-0.158058	7.60209	0.000489473	0.0144471	Rap Guanine Nucleotide Exchange Factor 3, EPAC1	Guanine nucleotide exchange factor (GEF) for RAP1A and RAP2A small GTPases that is activated by binding cAMP. Through simultaneous binding of PDE3B to RAPGEF3 and PIK3R6 is assembled in a signaling complex in which it activates the PI3K gamma complex and which is involved in angiogenesis. Plays a role in the modulation of the cAMP-induced dynamic control of endothelial barrier function through a …	https://pubmed.ncbi.nlm.nih.gov/32111741/?from_term=Rapgef3&from_sort=pubdate&from_pos=1 https://pubmed.ncbi.nlm.nih.gov/31943825/?from_term=Rapgef3&from_sort=pubdate&from_pos=2 https://pubmed.ncbi.nlm.nih.gov/31943825/?from_term=Rapgef3&from_sort=pubdate&from_pos=2	Signaling	3.02	cAMP	RAP	there are epac regualtors - https://www.tocris.com/products/8-pcpt-2-o-me-camp-am_4853:https://watermark.silverchair.com/bst-2019-0254c.pdf?token=AQECAHi208BE49Ooan9kkhW_Ercy7Dm3ZL_9Cf3qfKAc485ysgAAA9QwggPQBgkqhkiG9w0BBwagggPBMIIDvQIBADCCA7YGCSqGSIb3DQEHATAeBglghkgBZQMEAS4wEQQMO	RAP, cAMP, tight junctions, actin rearrangement, metabolism, junctional integrity
ENSMUSG00000022220	Adcy4	ENSMUST00000002398.7,ENSMUST00000170223.7	protein_coding	-0.154797	8.51331	0.00187046	0.0365866	Adenylyl cyclase type 4	This gene encodes a member of the family of adenylate cyclases, which are membrane-associated enzymes that catalyze the formation of the secondary messenger cyclic adenosine monophosphate (cAMP). Mouse studies show that adenylate cyclase 4, along with adenylate cyclases 2 and 3, is expressed in olfactory cilia, suggesting that several different adenylate cyclases may couple to olfactory receptors…	https://www.google.com/search?q=PKA+METABOLISM&sxsrf=ALeKk01ZDV_7TmC1tE3jT2HzmufmpyS3XQ:1588115120130&tbm=isch&source=iu&ictx=1&fir=sQoDawkCuPMCkM%253A%252CcBrOHMDb1eaqOM%252C_&vet=1&usg=AI4_-kQeJV1Ztop0mPJv-I83evNXg3v-5w&sa=X&ved=2ahUKEwiozePsnYzpAhUDCM0KHU4VDEkQ9QEwD3oECAYQHg#imgrc=sQoDawkCuPMCkM	Signaling	3.02	cAMP		cAMP production	cAMP, PKA, CREB, produce glucose in response to hyperglycemia
ENSMUSG00000024045	Akap8	ENSMUST00000002699.5	protein_coding	-0.154474	6.10673	0.00220585	0.0408355	A-kinase anchoring protein 8	Anchoring protein that mediates the subcellular compartmentation of cAMP-dependent protein kinase (PKA type II) (PubMed:9473338). Acts as an anchor for a PKA-signaling complex onto mitotic chromosomes, which is required for maintenance of chromosomes in a condensed form throughout mitosis. Recruits condensin complex subunit NCAPD2 to chromosomes required for chromatin condensation; the function a…		Signaling	3.02	cAMP			PKA, cell division, cell cycle
ENSMUSG00000053965	Pde5a	ENSMUST00000198314.1,ENSMUST00000199253.1,ENSMUST00000066728.9,ENSMUST00000200389.1	processed_transcript,retained_intron,protein_coding	0.226205	4.2951	0.00134116	0.0289542	Phosphodiesterase 5A	This gene encodes a cGMP-binding, cGMP-specific phosphodiesterase, a member of the cyclic nucleotide phosphodiesterase family. This phosphodiesterase specifically hydrolyzes cGMP to 5'-GMP. It is involved in the regulation of intracellular concentrations of cyclic nucleotides and is important for smooth muscle relaxation in the cardiovascular system. Alternative splicing of this gene results in t…	https://pubmed.ncbi.nlm.nih.gov/21421555/ https://www.researchgate.net/publication/51212483_IRAG_and_novel_PKG_targeting_in_the_cardiovascular_system/figures?lo=1&utm_source=google&utm_medium=organic https://www.researchgate.net/publication/41166995_PDE5A_suppression_of_acute_b-adrenergic_activation_requires_modulation_of_myocyte_beta-3_signaling_coupled_to_PKG-mediated_troponin_I_phosphorylation…	Signaling	3.02	cAMP	cAMP cGMP	Suppress NOS3	hydrolysis of cGMP to 5'-GMP, inhibits NOS3, PKG1
ENSMUSG00000019832	Rab32	ENSMUST00000019974.4,ENSMUST00000220018.1	processed_transcript,protein_coding	0.335549	3.6886	0.000448959	0.0135983	RAB32, Member RAS Oncogene Family	The protein encoded by this gene anchors the type II regulatory subunit of protein kinase A to the mitochondrion and aids in mitochondrial fission. The encoded protein also appears to be involved in autophagy and melanosome secretion. Variations in this gene may be linked to leprosy. [provided by RefSeq, Dec 2015]Acts as an A-kinase anchoring protein by binding to the type II regulatory subunit o…	https://pubmed.ncbi.nlm.nih.gov/32295849/?from_term=Rab32+&from_sort=pubdate&from_pos=2 https://pubmed.ncbi.nlm.nih.gov/28115010/	Signaling	3.02	cAMP	Mitochondria Camp-PKA	Specifically, we identify that Rab32 supports mTORC1 signaling under basal and amino acid stimulated conditions. Consistent with inhibited mTORC1, an increase in nuclear TFEB localization and lysosome biogenesis is also observed in Rab32-depleted cells.	PKA, mitochondria, mTOR
ENSMUSG00000027499	Pkia	ENSMUST00000028999.11,ENSMUST00000193330.1,ENSMUST00000192468.1	protein_coding	0.342376	3.20872	0.00113627	0.0257235	CAMP-Dependent Protein Kinase Inhibitor Alpha	Extremely potent competitive inhibitor of cAMP-dependent protein kinase activity, this protein interacts with the catalytic subunit of the enzyme after the cAMP-induced dissociation of its regulatory chains.		Signaling	3.02	cAMP			inhibit cAMP, EPAC,
ENSMUSG00000020654	Adcy3	ENSMUST00000152065.7,ENSMUST00000127110.1,ENSMUST00000150944.1,ENSMUST00000152792.7,ENSMUST00000127756.7,ENSMUST00000134680.1,ENSMUST00000124505.7,ENSMUST00000020984.8	processed_transcript,retained_intron,protein_coding	0.344608	2.73408	0.00200581	0.0381376	Adenylate Cyclase 3	membrane-associated enzyme and catalyzes the formation of the secondary messenger cyclic adenosine monophosphate (cAMP)		Signaling	3.02	cAMP		cAMP prodiction	cAMP, PKA, CREB, produce glucose in response to hyperglycemia
ENSMUSG00000030671	Pde3b	ENSMUST00000149455.1,ENSMUST00000032909.8,ENSMUST00000210411.1,ENSMUST00000140007.1	retained_intron,protein_coding	0.398635	1.69123	0.00213395	0.0398326	Phosphodiesterase 3B	Cyclic nucleotide phosphodiesterase with a dual-specificity for the second messengers cAMP and cGMP, which are key regulators of many important physiological processes. May play a role in fat metabolism. Regulates cAMP binding of RAPGEF3. Through simultaneous binding to RAPGEF3 and PIK3R6 assembles a signaling complex in which the PI3K gamma complex is activated by RAPGEF3 and which is involved i…		Signaling	3.02	cAMP	cAMP cGMP		cAMP, cGMP and PI3K
ENSMUSG00000002997	Prkar2b	ENSMUST00000036497.15,ENSMUST00000146865.1,ENSMUST00000003079.11	protein_coding	0.505516	2.57363	0.000416726	0.0129358	Protein Kinase CAMP-Dependent Type II Regulatory Subunit Beta	cAMP is a signaling molecule important for a variety of cellular functions. cAMP exerts its effects by activating the cAMP-dependent protein kinase, which transduces the signal through phosphorylation of different target proteins. The inactive kinase holoenzyme is a tetramer composed of two regulatory and two catalytic subunits. cAMP causes the dissociation of the inactive holoenzyme into a dimer…	https://pubmed.ncbi.nlm.nih.gov/11042199/	Signaling	3.02	cAMP			cAMP, suppress CREB1, promote epithlial cell to mesochyme transition
ENSMUSG00000022419	Deptor	ENSMUST00000096433.9,ENSMUST00000023056.7,ENSMUST00000100660.10	protein_coding	-0.438605	4.11914	0.0010148	0.023878	DEP Domain Containing MTOR Interacting Protein	Negative regulator of the mTORC1 and mTORC2 signaling pathways. Inhibits the kinase activity of both complexes.	https://pubmed.ncbi.nlm.nih.gov/31685947/?from_term=Deptor&from_sort=pubdate&from_page=2&from_pos=3	Signaling	3.03	AMPK-PP2A-MTOR			inhibits mTOR
ENSMUSG00000026626	Ppp2r5a	ENSMUST00000192334.1,ENSMUST00000194953.1,ENSMUST00000195859.1,ENSMUST00000195605.5,ENSMUST00000191925.1,ENSMUST00000067976.8,ENSMUST00000191920.1,ENSMUST00000194832.1	nonsense_mediated_decay,processed_transcript,retained_intron,protein_coding	-0.369466	8.56259	7.25016e-06	0.000749307	Protein Phosphatase 2 Regulatory Subunit B'Alpha	The product of this gene belongs to the phosphatase 2A regulatory subunit B family. Protein phosphatase 2A is one of the four major Ser/Thr phosphatases, and it is implicated in the negative control of cell growth and division. It consists of a common heteromeric core enzyme, which is composed of a catalytic subunit and a constant regulatory subunit, that associates with a variety of regulatory s…	https://ashpublications.org/blood/article/128/22/1056/96047/PP2A-Balances-Glucose-Metabolism-and-Foxo	Signaling	3.03	AMPK-PP2A-MTOR		23721711 - needed for correct junctional complexes, also metabolism sensor	Metabolism, CIP2A, PI3K-AKT-mTOR
ENSMUSG00000020108	Ddit4	ENSMUST00000020308.4	protein_coding	-0.351964	6.55367	2.72679e-05	0.00184885	DNA Damage Inducible Transcript 4	Regulates cell growth, proliferation and survival via inhibition of the activity of the mammalian target of rapamycin complex 1 (mTORC1). Inhibition of mTORC1 is mediated by a pathway that involves DDIT4/REDD1, AKT1, the TSC1-TSC2 complex and the GTPase RHEB. Plays an important role in responses to cellular energy levels and cellular stress, including responses to hypoxia and DNA damage. Regulate…		Signaling	3.03	AMPK-PP2A-MTOR	MTOR		Inhibit mTOR (so wrong way based on predictions) and promotes autophagy
ENSMUSG00000027200	Sema6d	ENSMUST00000103240.8,ENSMUST00000103239.9,ENSMUST00000151199.1,ENSMUST00000078621.11,ENSMUST00000103241.7,ENSMUST00000051419.14,ENSMUST00000132088.1,ENSMUST00000076335.11,ENSMUST00000077847.11,ENSMUST00000137172.1,ENSMUST00000103238.1	processed_transcript,retained_intron,protein_coding	-0.264099	6.29058	0.00143993	0.030443	Semaphorin 6D	Semaphorins are a large family, including both secreted and membrane associated proteins, many of which have been implicated as inhibitors or chemorepellents in axon pathfinding, fasciculation and branching, and target selection. All semaphorins possess a semaphorin (Sema) domain and a PSI domain (found in plexins, semaphorins and integrins) in the N-terminal extracellular portion. Additional seq…	https://pubmed.ncbi.nlm.nih.gov/29777213/	Signaling	3.03	AMPK-PP2A-MTOR	3		chemorepellant for many cells, plexin A1 receptor, mTOR-PPARG lipid metabolism
ENSMUSG00000032633	Flcn	ENSMUST00000148151.7,ENSMUST00000151453.1,ENSMUST00000091246.10,ENSMUST00000102697.9,ENSMUST00000047706.2,ENSMUST00000133647.7	processed_transcript,retained_intron,protein_coding	-0.255335	5.49766	7.23616e-06	0.000749307	Folliculin	This gene is located within the Smith-Magenis syndrome region on chromosome 17. Mutations in this gene are associated with Birt-Hogg-Dube syndrome, which is characterized by fibrofolliculomas, renal tumors, lung cysts, and pneumothorax. Alternative splicing of this gene results in two transcript variants encoding different isoforms. [provided by RefSeq, Jul 2008]		Signaling	3.03	AMPK-PP2A-MTOR	3	. ficiency of folliculin and of p0071 resulted in tight junction defects and mislocalization of E-cadherin in mouse inner medullary collecting duct-3 renal tubular cells. tumor suppressor. May be involved in energy and/or nutrient sensing through the AMPK and mTOR signaling pathways. May regulate phosphorylation of RPS6KB1.
ENSMUSG00000093803	Ppp2r3d	ENSMUST00000217354.1,ENSMUST00000189707.1,ENSMUST00000180233.2,ENSMUST00000188509.1,ENSMUST00000180270.1,ENSMUST00000216876.1,ENSMUST00000187126.2,ENSMUST00000216394.1	retained_intron,protein_coding	-0.238339	5.4862	3.14194e-05	0.00201749	Serine/threonine-protein phosphatase 2A regulatory subunit B'' subunit delta	The B regulatory subunit might modulate substrate selectivity and catalytic activity, and also might direct the localization of the catalytic enzyme to a particular subcellular compartment. Interacts with retinoblastoma-related protein p107 (in vivo). May target PP2A core dimer to p107 resulting in dephosphorylation of p107.	https://pubmed.ncbi.nlm.nih.gov/18566123/ https://www.nature.com/articles/srep19821	Signaling	3.03	AMPK-PP2A-MTOR		Read about PP2A more,	PP2A, P107
ENSMUSG00000028944	Prkag2	ENSMUST00000150135.7,ENSMUST00000148531.1,ENSMUST00000129022.7,ENSMUST00000131486.1,ENSMUST00000123749.1,ENSMUST00000135525.1,ENSMUST00000030784.13,ENSMUST00000114975.7,ENSMUST00000076306.11,ENSMUST00000139698.1	processed_transcript,retained_intron,protein_coding	-0.234954	6.96499	0.00167871	0.0339126	Protein Kinase AMP-Activated Non-Catalytic Subunit Gamma 2, AMPK Gamma2	AMP/ATP-binding subunit of AMP-activated protein kinase (AMPK), an energy sensor protein kinase that plays a key role in regulating cellular energy metabolism. In response to reduction of intracellular ATP levels, AMPK activates energy-producing pathways and inhibits energy-consuming processes: inhibits protein, carbohydrate and lipid biosynthesis, as well as cell growth and proliferation. AMPK a…		Signaling	3.03	AMPK-PP2A-MTOR	AMPK	s: The PRKAG2 N488I mutation causes inappropriate AMPK activation, which leads to glycogen accumulation	AMPK, cellular energy metabolism
ENSMUSG00000026213	Stk11ip	ENSMUST00000129652.1,ENSMUST00000027414.15,ENSMUST00000146575.7,ENSMUST00000140963.7,ENSMUST00000156838.7,ENSMUST00000129794.1,ENSMUST00000113553.1,ENSMUST00000154303.1,ENSMUST00000150560.1	processed_transcript,retained_intron,protein_coding	-0.221184	5.10298	0.000532449	0.0153021	Serine/Threonine Kinase 11 Interacting Protein	May regulate STK11/LKB1 function by controlling its subcellular localization.STK11IP (Serine/Threonine Kinase 11 Interacting Protein) is a Protein Coding gene. Diseases associated with STK11IP include Peutz-Jeghers Syndrome and Cowden Syndrome. Among its related pathways are Innate Immune System and LKB1 signaling events. Gene Ontology (GO) annotations related to this gene include protein kinase …	https://pubmed.ncbi.nlm.nih.gov/31983282/?from_term=+STK11%2FLKB1&from_sort=pubdate&from_pos=3	Signaling	3.03	AMPK-PP2A-MTOR			AMPK; PRKDC; autophagy; lysosome; metabolism; signaling
ENSMUSG00000066324	Impad1	ENSMUST00000084949.2	protein_coding	0.179582	6.08461	0.000829558	0.0210661	Inositol Monophosphatase Domain Containing 1	This gene encodes a member of the inositol monophosphatase family. The encoded protein is localized to the Golgi apparatus and catalyzes the hydrolysis of phosphoadenosine phosphate (PAP) to adenosine monophosphate (AMP). Mutations in this gene are a cause of GRAPP type chondrodysplasia with joint dislocations, and a pseudogene of this gene is located on the long arm of chromosome 1. [provided by…		Signaling	3.03	AMPK-PP2A-MTOR			AMP signaling
ENSMUSG00000033031	C330027C09Rik	ENSMUST00000123975.1,ENSMUST00000130080.7,ENSMUST00000048374.5,ENSMUST00000127995.1,ENSMUST00000133754.1,ENSMUST00000149004.1,ENSMUST00000125278.1,ENSMUST00000117994.7	nonsense_mediated_decay,retained_intron,protein_coding	0.653806	4.05478	8.51514e-07	0.000171832	Protein CIP2A also known as cancerous inhibitor of PP2A (CIP2A)	Protein phosphatase 2A (PP2A) is a trimeric serine-threonine phosphatase consisting of a catalytic C-subunit (PP2Ac), a scaffolding A-subunit and various regulatory B-subunits. Importantly, it has been estimated that collectively PP2A complexes can dephosphorylate a vast majority of all cellular serine/threonine phosphorylated proteins including large number of phosphoproteins involved in cancer …	https://www.ncbi.nlm.nih.gov/pubmed/26732598	Signaling	3.03	AMPK-PP2A-MTOR	mitochondria	PP2A is important for mitcochondrial function in endothelial cells. Inhibiting PP2A = detrimental mitochnodrial dynamics and lower levels are foud in 3xTG mice. Linked to DRP1, Fis1, mfn1, mfn2 and OPA1 levels	Calcium, mitochondria, endoplasmic reticulum stress
ENSMUSG00000031530	Dusp4	ENSMUST00000033930.4	protein_coding	-0.4148	2.48099	0.000294302	0.0100214	Dual Specificity Phosphatase 4	The protein encoded by this gene is a member of the dual specificity protein phosphatase subfamily. These phosphatases inactivate their target kinases by dephosphorylating both the phosphoserine/threonine and phosphotyrosine residues. They negatively regulate members of the mitogen-activated protein (MAP) kinase superfamily (MAPK/ERK, SAPK/JNK, p38), which are associated with cellular proliferati…	https://pubmed.ncbi.nlm.nih.gov/26184564/?from_term=Dusp4+endothelial+cell&from_sort=pubdate&from_pos=3	Signaling	3.04	MAPK	all	Negative regulator of MAPK	MAPK, ROS
ENSMUSG00000028862	Map3k6	ENSMUST00000123612.1,ENSMUST00000134895.1,ENSMUST00000127681.1,ENSMUST00000030677.6	processed_transcript,protein_coding	-0.330224	8.13902	4.30014e-05	0.00251017	Mitogen-Activated Protein Kinase Kinase Kinase 6	Component of a protein kinase signal transduction cascade. Activates the JNK, but not ERK or p38 kinase pathways		Signaling	3.04	MAPK	JNK	Inhibition results in lower VEGF..	JNK
ENSMUSG00000021754	Map3k1	ENSMUST00000175936.1,ENSMUST00000130594.1,ENSMUST00000109267.8,ENSMUST00000145055.1,ENSMUST00000133364.1	processed_transcript,retained_intron,protein_coding	-0.329877	6.10847	2.71254e-07	9.68185e-05	MEKK1	The protein encoded by this gene is a serine/threonine kinase and is part of some signal transduction cascades, including the ERK and JNK kinase pathways as well as the NF-kappa-B pathway. The encoded protein is activated by autophosphorylation and requires magnesium as a cofactor in phosphorylating other proteins. This protein has E3 ligase activity conferred by a plant homeodomain (PHD) in its …	https://pubmed.ncbi.nlm.nih.gov/10085121/	Signaling	3.04	MAPK	ERK JNK		ERK, JNK-smad2, NFKb
ENSMUSG00000058396	Gpr182	ENSMUST00000079692.5	protein_coding	-0.313054	8.56457	1.36515e-05	0.00118001	G protein-coupled receptor 182	inhibit ERK1/2 signaling to regulate the proliferative capacity of the intestine.		Signaling	3.04	MAPK	ERK		Signaling
ENSMUSG00000024163	Mapk8ip3	ENSMUST00000119115.7,ENSMUST00000146706.1,ENSMUST00000121787.7,ENSMUST00000147109.1,ENSMUST00000156663.1,ENSMUST00000120035.7,ENSMUST00000117509.7,ENSMUST00000132258.1,ENSMUST00000152486.1,ENSMUST00000148360.1,ENSMUST00000115229.9,ENSMUST00000178969.7,ENSMUST00000088345.11,ENSMUST00000115228.8,ENSMUST00000126280.1,ENSMUST00000133198.1,ENSMUST00000146923.7,ENSMUST00000145357.1,ENSMUST00000144336.1…	nonsense_mediated_decay,processed_transcript,retained_intron,protein_coding	-0.25817	7.15382	3.62352e-06	0.000469806	Mitogen-Activated Protein Kinase 8 Interacting Protein 3, JIP3	The protein encoded by this gene shares similarity with the product of Drosophila syd gene, required for the functional interaction of kinesin I with axonal cargo. Studies of the similar gene in mouse suggested that this protein may interact with, and regulate the activity of numerous protein kinases of the JNK signaling pathway, and thus function as a scaffold protein in neuronal cells. The C. e…		Signaling	3.04	MAPK	JNK		JNK signaling
ENSMUSG00000024383	Map3k2	ENSMUST00000096575.3	protein_coding	-0.229631	4.83779	0.00175262	0.0350224	Mitogen-Activated Protein Kinase Kinase Kinase 2	The protein encoded by this gene is a member of serine/threonine protein kinase family. This kinase preferentially activates other kinases involved in the MAP kinase signaling pathway. This kinase has been shown to directly phosphorylate and activate Ikappa B kinases, and thus plays a role in NF-kappa B signaling pathway. This kinase has also been found to bind and activate protein kinase C-relat…		Signaling	3.04	MAPK			NFkb signaling, JNK signaling, calveoli signaling, activated protein kinase C-related kinase 2
ENSMUSG00000042046	Dstyk	ENSMUST00000191494.1,ENSMUST00000188006.1,ENSMUST00000188973.1,ENSMUST00000188389.1,ENSMUST00000187092.1,ENSMUST00000045110.13	processed_transcript,retained_intron,protein_coding	-0.226143	5.2203	0.00101394	0.023878	Dual Serine/Threonine And Tyrosine Protein Kinase, RIPK5	cts as a positive regulator of ERK phosphorylation downstream of fibroblast growth factor-receptor activation (PubMed:23862974, PubMed:28157540). Involved in the regulation of both caspase-dependent apoptosis and caspase-independent cell death (PubMed:15178406). In the skin, it plays a predominant role in suppressing caspase-dependent apoptosis in response to UV stress in a range of dermal cell t…	https://pubmed.ncbi.nlm.nih.gov/31980602/?from_term=Dstyk&from_sort=pubdate&from_pos=2	Signaling	3.04	MAPK	ERK		ERK signaling, lysosome, mTOR, FGF
ENSMUSG00000003644	Rps6ka1	ENSMUST00000003741.15,ENSMUST00000168974.8,ENSMUST00000174481.7,ENSMUST00000137486.2,ENSMUST00000173989.7,ENSMUST00000129636.1,ENSMUST00000173961.1,ENSMUST00000157067.8,ENSMUST00000105894.10	processed_transcript,retained_intron,protein_coding	-0.211396	6.79688	0.000156661	0.00641311	Ribosomal Protein S6 Kinase A1, P90-RSK 1	erine/threonine-protein kinase that acts downstream of ERK (MAPK1/ERK2 and MAPK3/ERK1) signaling and mediates mitogenic and stress-induced activation of the transcription factors CREB1, ETV1/ER81 and NR4A1/NUR77, regulates translation through RPS6 and EIF4B phosphorylation, and mediates cellular proliferation, survival, and differentiation by modulating mTOR signaling and repressing pro-apoptotic…		Signaling	3.04	MAPK	ERK		ERK, mTOR activation, EGF,
ENSMUSG00000040631	Dok4	ENSMUST00000212810.1,ENSMUST00000212745.1,ENSMUST00000046461.8,ENSMUST00000211892.1	protein_coding	-0.20098	5.65676	0.000391192	0.0123826	Docking Protein 4	DOK proteins are enzymatically inert adaptor or scaffolding proteins. They provide a docking platform for the assembly of multimolecular signaling complexes. DOK4 functions in RET-mediated neurite outgrowth and plays a positive role in activation of the MAP kinase pathway (By similarity). Putative link with downstream effectors of RET in neuronal differentiation. May be involved in the regulation…		Signaling	3.04	MAPK			MAPK signaling
ENSMUSG00000002948	Map2k7	ENSMUST00000110998.8,ENSMUST00000129866.7,ENSMUST00000110996.1,ENSMUST00000110994.8,ENSMUST00000062686.10,ENSMUST00000129537.1,ENSMUST00000110999.7,ENSMUST00000207247.1,ENSMUST00000003027.13,ENSMUST00000110995.7	processed_transcript,retained_intron,protein_coding	-0.169914	5.83413	0.00100144	0.0238163	Mitogen-Activated Protein Kinase Kinase 7	Dual specificity protein kinase which acts as an essential component of the MAP kinase signal transduction pathway. Essential component of the stress-activated protein kinase/c-Jun N-terminal kinase (SAP/JNK) signaling pathway. With MAP2K4/MKK4, is the one of the only known kinase to directly activate the stress-activated protein kinase/c-Jun N-terminal kinases MAPK8/JNK1, MAPK9/JNK2 and MAPK10/J…		Signaling	3.04	MAPK	JNK		JNK signaling, autophagy, inflamamiton
ENSMUSG00000001127	Araf	ENSMUST00000150190.1,ENSMUST00000123219.1,ENSMUST00000128250.2,ENSMUST00000136451.7,ENSMUST00000122312.7,ENSMUST00000148032.7,ENSMUST00000001155.10,ENSMUST00000152955.7,ENSMUST00000122850.1,ENSMUST00000120356.7	nonsense_mediated_decay,processed_transcript,retained_intron,protein_coding	-0.15244	6.68103	0.000625561	0.0171241	A-Raf Proto-Oncogene, Serine/Threonine Kinase	nvolved in the transduction of mitogenic signals from the cell membrane to the nucleus. May also regulate the TOR signaling cascade. ARAF_HUMAN,P10398		Signaling	3.05	Rho/Rac	ERK		RAS, ERK, TOM-TIM therefore mitochondria interactions
ENSMUSG00000073982	Rhog	ENSMUST00000098230.10,ENSMUST00000106923.1,ENSMUST00000209968.1	protein_coding	0.17785	6.75727	0.000493177	0.0144789	Ras Homolog Family Member G	Small G proteins (small GTPases) are homologous to Galpha proteins and are often referred to as the Ras proto-oncogene superfamily. Small GTPases regulate a wide variety of processes in the cell, including growth, differentiation, movement and lipid vesicle transport.	https://www.ncbi.nlm.nih.gov/pmc/articles/PMC2064659/ https://pubmed.ncbi.nlm.nih.gov/32377503/?from_term=rhog+enodhtelial+cell&from_sort=pubdate&from_pos=1	Signaling	3.05	Rho/Rac	ERK		Rac activation, inflammation, migration, proliferation
ENSMUSG00000027223	Mapk8ip1	ENSMUST00000149653.1,ENSMUST00000111279.8,ENSMUST00000050312.2	processed_transcript,protein_coding	0.493334	2.08049	0.000521591	0.0150671	Mitogen-Activated Protein Kinase 8 Interacting Protein 1, JNK MAP Kinase Scaffold Protein 1	The JNK-interacting protein (JIP) group of scaffold proteins selectively mediates JNK signaling by aggregating specific components of the MAPK cascade to form a functional JNK signaling module. Required for JNK activation in response to excitotoxic stress. Cytoplasmic MAPK8IP1 causes inhibition of JNK-regulated activity by retaining JNK in the cytoplasm and inhibiting JNK phosphorylation of c-Jun…		Signaling	3.04	MAPK	JNK		JNK signaling(inhibit)
ENSMUSG00000022033	Pbk	ENSMUST00000139644.1,ENSMUST00000152130.1,ENSMUST00000022612.9	processed_transcript,protein_coding	0.531651	4.08478	4.39203e-05	0.00254242	PDZ Binding Kinase	This gene encodes a serine/threonine protein kinase related to the dual specific mitogen-activated protein kinase kinase (MAPKK) family. Evidence suggests that mitotic phosphorylation is required for its catalytic activity. The encoded protein may be involved in the activation of lymphoid cells and support testicular functions, with a suggested role in the process of spermatogenesis. Overexpressi…		Signaling	3.04	MAPK		Cancer	p38 signaling, proliferation,
ENSMUSG00000028977	Casz1	ENSMUST00000122222.7,ENSMUST00000128881.1,ENSMUST00000094464.9,ENSMUST00000140617.1,ENSMUST00000139806.1,ENSMUST00000147270.1	processed_transcript,protein_coding	-0.443762	4.55084	4.52601e-06	0.000521933	Castor Zinc Finger 1	The protein encoded by this gene is a zinc finger transcription factor. The encoded protein may function as a tumor suppressor, and single nucleotide polymorphisms in this gene are associated with blood pressure variation. Alternative splicing results in multiple transcript variants that encode different protein isoforms. [provided by RefSeq, Jul 2012]	https://www.ncbi.nlm.nih.gov/pmc/articles/PMC4011818/	Signaling	3.05	Rho/Rac	RhoA	Important for vascogenesis with EGFL7 and RhoA	Transcription factor, RhoA, egfl7, angiogenesis
ENSMUSG00000016128	Stard13	ENSMUST00000202866.1,ENSMUST00000141117.7,ENSMUST00000202385.3,ENSMUST00000146814.4,ENSMUST00000129088.7,ENSMUST00000126770.1,ENSMUST00000202111.3,ENSMUST00000062015.14,ENSMUST00000201680.3,ENSMUST00000110483.8	processed_transcript,retained_intron,protein_coding	-0.30411	8.08853	7.09657e-07	0.000157909	StAR-related lipid transfer domain protein 13 (aka DLC2)	Rho GTPase-activating protein (GAP), a type of protein that regulates members of the Rho family of GTPases.[7] It selectively activates RhoA and CDC42 and suppresses cell growth by inhibiting actin stress fiber assembly.[7]	https://www.ncbi.nlm.nih.gov/pubmed/29310936	Signaling	3.05	Rho/Rac	RhoA	inhibits angiogenesis (https://www.ncbi.nlm.nih.gov/pmc/articles/PMC2874629/)	RhoA activation
ENSMUSG00000021895	Arhgef3	ENSMUST00000049206.5	protein_coding	-0.29654	6.9493	0.000487911	0.014447	Rho Guanine Nucleotide Exchange Factor 3	This gene encodes a guanine nucleotide exchange factor, which specifically activates two members of the Rho GTPase family: RHOA and RHOB		Signaling	3.05	Rho/Rac	RhoA and b		GEF, RhoA,
ENSMUSG00000036006	Fam65b	ENSMUST00000110384.8,ENSMUST00000134370.7,ENSMUST00000177489.1,ENSMUST00000177174.1,ENSMUST00000176303.1,ENSMUST00000175986.1,ENSMUST00000091694.9,ENSMUST00000038477.6,ENSMUST00000110383.7,ENSMUST00000177298.7,ENSMUST00000058009.15,ENSMUST00000132689.7,ENSMUST00000138547.7	nonsense_mediated_decay,retained_intron,protein_coding	-0.293164	4.90637	0.0019218	0.037162	RHO Family Interacting Cell Polarization Regulator 2	This gene encodes an atypical inhibitor of the small G protein RhoA. Inhibition of RhoA activity by the encoded protein mediates myoblast fusion and polarization of T cells and neutrophils. The encoded protein is a component of hair cell stereocilia that is essential for hearing. A splice site mutation in this gene results in hearing loss in human patients. [provided by RefSeq, Sep 2016]Acts as a…		Signaling	3.05	Rho/Rac	RhoA		Inhibit RhoA, cell polarization
ENSMUSG00000032198	Dock6	ENSMUST00000216626.1,ENSMUST00000217515.1,ENSMUST00000034728.8,ENSMUST00000217336.1,ENSMUST00000213296.1,ENSMUST00000217310.1,ENSMUST00000215729.1,ENSMUST00000213775.1	nonsense_mediated_decay,processed_transcript,retained_intron,protein_coding	-0.268516	9.07207	3.70996e-05	0.00224134	Dedicator Of Cytokinesis 6	This gene encodes a member of the dedicator of cytokinesis (DOCK) family of atypical guanine nucleotide exchange factors. Guanine nucleotide exchange factors interact with small GTPases and are components of intracellular signaling networks. The encoded protein is a group C DOCK protein and plays a role in actin cytoskeletal reorganization by activating the Rho GTPases Cdc42 and Rac1.	http://genesdev.cshlp.org/content/28/6/533.full	Signaling	3.05	Rho/Rac	Rac1		Activates rac, cell migration
ENSMUSG00000031442	Mcf2l	ENSMUST00000110867.8,ENSMUST00000110873.9,ENSMUST00000138387.1,ENSMUST00000127229.1,ENSMUST00000123811.8,ENSMUST00000145892.2,ENSMUST00000145067.7,ENSMUST00000173006.7,ENSMUST00000110879.8,ENSMUST00000130302.1,ENSMUST00000156560.1,ENSMUST00000139776.3,ENSMUST00000173099.7,ENSMUST00000126905.7,ENSMUST00000095456.9,ENSMUST00000110876.8,ENSMUST00000156405.7,ENSMUST00000110866.8,ENSMUST00000134989.2,…	processed_transcript,retained_intron,protein_coding	-0.203117	8.28187	0.000143502	0.00605397	MCF.2 Cell Line Derived Transforming Sequence Like	This gene encodes a guanine nucleotide exchange factor that interacts specifically with the GTP-bound Rac1 and plays a role in the Rho/Rac signaling pathways. A variant in this gene was associated with osteoarthritis. Alternative splicing results in multiple transcript variants. [provided by RefSeq, Mar 2016]	https://fdb5.ctrl.ucla.edu/gpb/institution/publication-download?publication_id=5329807	Signaling	3.05	Rho/Rac	Rac1	stress fibers, angiogenesis	Rac activity
ENSMUSG00000026991	Pkp4	ENSMUST00000184332.7,ENSMUST00000102754.10,ENSMUST00000168631.7,ENSMUST00000183359.7,ENSMUST00000183625.7,ENSMUST00000037903.14,ENSMUST00000123908.7,ENSMUST00000112577.7,ENSMUST00000184705.7,ENSMUST00000124127.1,ENSMUST00000124725.1,ENSMUST00000122888.7,ENSMUST00000126749.1,ENSMUST00000151452.7	nonsense_mediated_decay,processed_transcript,protein_coding	-0.152262	7.85821	0.000980442	0.0235411	Plakophilin-4	Plays a role as a regulator of Rho activity during cytokinesis. May play a role in junctional plaques.		Signaling	3.05	Rho/Rac	Rho		RhoA, membrane integrity possibly
ENSMUSG00000040940	Arhgef1	ENSMUST00000206011.1,ENSMUST00000126484.1,ENSMUST00000206508.1,ENSMUST00000132751.1,ENSMUST00000126918.7,ENSMUST00000127761.7,ENSMUST00000151121.1,ENSMUST00000206028.1,ENSMUST00000117796.7,ENSMUST00000129928.1,ENSMUST00000205295.1,ENSMUST00000132786.1,ENSMUST00000145783.7,ENSMUST00000144714.1,ENSMUST00000206906.1,ENSMUST00000117419.7,ENSMUST00000129383.1,ENSMUST00000098683.10,ENSMUST00000047873.15	processed_transcript,retained_intron,protein_coding	-0.146071	7.94443	0.00100673	0.0238185	Rho Guanine Nucleotide Exchange Factor 1	Seems to play a role in the regulation of RhoA GTPase by guanine nucleotide-binding alpha-12 (GNA12) and alpha-13 (GNA13) subunits (PubMed:9641915, PubMed:9641916). Acts as GTPase-activating protein (GAP) for GNA12 and GNA13, and as guanine nucleotide exchange factor (GEF) for RhoA GTPase (PubMed:9641915, PubMed:9641916, PubMed:8810315, PubMed:30521495).		Signaling	3.05	Rho/Rac	RhoA	Low levels = lower actication of RhoA	RhoA
ENSMUSG00000059495	Arhgef12	ENSMUST00000214175.1,ENSMUST00000215898.1,ENSMUST00000213566.1,ENSMUST00000072767.6,ENSMUST00000165665.8,ENSMUST00000217502.1	nonsense_mediated_decay,retained_intron,protein_coding	-0.132357	9.00987	0.00236652	0.0428222	Rho Guanine Nucleotide Exchange Factor 12 (aka LARG)	GEF for RhoA GTPase		Signaling	3.05	Rho/Rac	RhoA	regulates leukocyte behavior and EC stiffening (24585879), reorientation of ECs (25795300)	RhoA, cytoskeleton arrangement
ENSMUSG00000006299	Aamp	ENSMUST00000191258.1,ENSMUST00000006462.13,ENSMUST00000178235.7,ENSMUST00000187046.1,ENSMUST00000186833.1,ENSMUST00000190008.1	retained_intron,protein_coding	-0.12048	6.94753	0.00241466	0.0435553	Angio-associated migratory cell protein	It is found to be expressed strongly in the cytosol of endothelial cells, cytotrophoblasts, and poorly differentiated colon adenocarcinoma cells found in lymphatics and has been observed at the luminal edges of endometrial cells and in the extracellular environment of vascular-associated mesenchymal cells	https://pubmed.ncbi.nlm.nih.gov/26350504/	Signaling	3.05	Rho/Rac	RhoA	AAMP helps to regulate vascular endothelial cell migration regulation and angiogenesis, with other signaling pathway like RhoA/Rho-kinase signaling	Angiognenesis, migration, RhoA,
ENSMUSG00000025265	Fgd1	ENSMUST00000125620.1,ENSMUST00000112685.7,ENSMUST00000124882.1,ENSMUST00000026296.7	retained_intron,protein_coding	0.179359	4.77491	0.00193157	0.0372299	FYVE, RhoGEF And PH Domain Containing 1	This gene encodes a protein that contains Dbl (DH) and pleckstrin (PH) homology domains and is similar to the Rho family of small GTP-binding proteins. The encoded protein specifically binds to the Rho family GTPase Cdc42Hs and can stimulate the GDP-GTP exchange of the isoprenylated form of Cdc42Hs. It also stimulates the mitogen activated protein kinase cascade leading to c-Jun kinase SAPK/JNK1 …		Signaling	3.05	Rho/Rac	cdc42	cdc42 - cell migration, proliferaition, cancer	cdc42 activator
ENSMUSG00000020580	Rock2	ENSMUST00000020904.6	protein_coding	0.198505	8.16814	4.16898e-05	0.00245746	Rho Associated Coiled-Coil Containing Protein Kinase 2	Protein kinase which is a key regulator of actin cytoskeleton and cell polarity. Involved in regulation of smooth muscle contraction, actin cytoskeleton organization, stress fiber and focal adhesion formation, neurite retraction, cell adhesion and motility via phosphorylation of ADD1, BRCA2, CNN1, EZR, DPYSL2, EP300, MSN, MYL9/MLC2, NPM1, RDX, PPP1R12A and VIM. Phosphorylates SORL1 and IRF4. Acts…	https://www.ncbi.nlm.nih.gov/pubmed/?term=30165352	Signaling	3.05	Rho/Rac	Rock2	The results of this study support the novel concept that ROCK1 is involved in oxLDL-induced cell adhesion by regulating adhesion molecule expression, whereas ROCK2 is required for both endothelial apoptosis and adhesion by regulating both the vimentin cytoskeleton and adhesion molecules. Consequently, ROCK1 and ROCK2 have distinct roles in the regulation of oxLDL-mediated endothelial dysfunction.	oxLDL, cell adhesion, cytoskeleton
ENSMUSG00000020589	Fam49a	ENSMUST00000069005.8,ENSMUST00000069066.12	protein_coding	0.241671	4.91661	0.00109027	0.025131	CYFIP Related Rac1 Interactor A	rac1 binding		Signaling	3.05	Rho/Rac	Rac1		rac1
ENSMUSG00000044447	Dock5	ENSMUST00000039135.4	protein_coding	0.244116	5.34704	0.00134084	0.0289542	Dedicator Of Cytokinesis 5	This gene encodes a member of the dedicator of cytokinesis protein family. Members of this family act as guanine nucleotide exchange factors for small Rho family G proteins. The protein encoded by this gene is thought to associate with adaptors CRK and CRKL, and function in regulation of intestinal epithelial cell spreading and migration on collagen IV. Similar proteins in mouse and zebrafish als…		Signaling	3.05	Rho/Rac	rac1		GEF, RHOA, Rac activator, cell migration and spreading, tubulin
ENSMUSG00000054855	Rnd1	ENSMUST00000120997.1,ENSMUST00000003451.10,ENSMUST00000109149.8	protein_coding	0.322412	6.85893	0.000113387	0.00513762	Rho Family GTPase 1	This gene encodes a protein that belongs to the Rho GTPase family. Members of this family regulate the organization of the actin cytoskeleton in response to extracellular growth factors. Lacks intrinsic GTPase activity. Has a low affinity for GDP, and constitutively binds GTP. Controls rearrangements of the actin cytoskeleton. Induces the Rac-dependent neuritic process formation in part by disrup…	https://www.ncbi.nlm.nih.gov/pubmed/?term=12747959	Signaling	3.05	Rho/Rac	Rnd1	https://en.wikipedia.org/wiki/Rho_family_of_GTPases	Rho, rac, actin, cell permeability
ENSMUSG00000032875	Arhgef17	ENSMUST00000107032.2,ENSMUST00000208735.1,ENSMUST00000209041.1,ENSMUST00000208482.1	retained_intron,protein_coding	0.464469	2.83327	0.00288065	0.0489565	Rho Guanine Nucleotide Exchange Factor 17	ARHGEF17 (Rho Guanine Nucleotide Exchange Factor 17) is a Protein Coding gene. Among its related pathways are Signaling by GPCR and p75 NTR receptor-mediated signalling. Gene Ontology (GO) annotations related to this gene include actin filament binding and Rho guanyl-nucleotide exchange factor activity.	https://pubmed.ncbi.nlm.nih.gov/26953350-arhgef17-is-an-essential-spindle-assembly-checkpoint-factor-that-targets-mps1-to-kinetochores/ https://www.ahajournals.org/doi/10.1161/CIRCGEN.118.002248	Signaling	3.05	Rho/Rac	RhoA		RhoA
ENSMUSG00000052609	Plekhg3	ENSMUST00000218380.1,ENSMUST00000075249.5,ENSMUST00000218427.1,ENSMUST00000219426.1,ENSMUST00000219751.1,ENSMUST00000217730.1,ENSMUST00000219063.1,ENSMUST00000218461.1,ENSMUST00000218357.1	retained_intron,protein_coding	0.467415	2.52154	0.000497156	0.0145483	Pleckstrin Homology And RhoGEF Domain Containing G3	PLEKHG3 (Pleckstrin Homology And RhoGEF Domain Containing G3) is a Protein Coding gene. Gene Ontology (GO) annotations related to this gene include Rho guanyl-nucleotide exchange factor activity.		Signaling	3.05	Rho/Rac	RhoG	A functional screen of RHOG candidate effectors identified PLEKHG3 as a promoter of Rac-mediated membrane ruffling downstream of RHOG.	rac, rhoG
ENSMUSG00000025154	Arhgap19	ENSMUST00000026150.14,ENSMUST00000177495.1,ENSMUST00000176266.7,ENSMUST00000163265.7	protein_coding	0.55907	3.99195	1.8025e-05	0.00139208	Rho GTPase Activating Protein 19	encode negative regulators of Rho GTPases (see RHOA; MIM 165390), which are involved in cell migration, proliferation, and differentiation, actin remodeling, and G1 cell cycle progression	https://www.ncbi.nlm.nih.gov/pmc/articles/PMC4049857/	Signaling	3.05	Rho/Rac	RhoA	Rho activity (inhibit)	Proliferation, adhesion, migration, angiogenesis, permeability, inflammation, RhoA
ENSMUSG00000028068	Iqgap3	ENSMUST00000193940.1,ENSMUST00000195465.1,ENSMUST00000071812.10,ENSMUST00000194772.1,ENSMUST00000194440.1,ENSMUST00000193861.1	nonsense_mediated_decay,retained_intron,protein_coding	0.559916	6.86849	2.40716e-05	0.00171697	IQ Motif Containing GTPase Activating Protein 3	calmodulin binding and Ras GTPase binding	https://jcs.biologists.org/content/120/4/567	Signaling	3.05	Rho/Rac	Rac	Actin binding and organization. Higer levels would be predicted to promote cellualr outgrowth	Rac/cdc42 effector, actin binding, migration, cytoskeleton organization
ENSMUSG00000023015	Racgap1	ENSMUST00000109581.2,ENSMUST00000171017.7,ENSMUST00000171702.7,ENSMUST00000169700.7,ENSMUST00000171908.1,ENSMUST00000168834.1,ENSMUST00000165745.7,ENSMUST00000023756.11,ENSMUST00000168065.7,ENSMUST00000168976.1,ENSMUST00000165730.7,ENSMUST00000164983.7,ENSMUST00000169810.7,ENSMUST00000170369.7	nonsense_mediated_decay,processed_transcript,retained_intron,protein_coding	0.57129	6.12682	3.27966e-05	0.00207659	Rac GTPase Activating Protein	This gene encodes a GTPase-activating protein (GAP) that is a compoment of the centralspindlin complex. This protein binds activated forms of Rho GTPases and stimulates GTP hydrolysis, which results in negative regulation of Rho-mediated signals.	https://www.ncbi.nlm.nih.gov/pmc/articles/PMC5765294/	Signaling	3.05	Rho/Rac	RhoA	Inhibit Rho	Proliferation, Rho inhibition,
ENSMUSG00000051517	Arhgef39	ENSMUST00000154905.7,ENSMUST00000125834.7,ENSMUST00000054538.12,ENSMUST00000128754.7,ENSMUST00000152134.7,ENSMUST00000156058.1,ENSMUST00000136005.2,ENSMUST00000146781.1,ENSMUST00000147124.7,ENSMUST00000129378.1	processed_transcript,protein_coding	0.574628	2.93956	0.000921115	0.0225503	Rho Guanine Nucleotide Exchange Factor 39	Signaling by GPCR and p75 NTR receptor-mediated signalling.	https://www.nature.com/articles/s41374-018-0022-y	Signaling	3.05	Rho/Rac	Rac1		Rho
ENSMUSG00000027699	Ect2	ENSMUST00000124727.1,ENSMUST00000176242.8,ENSMUST00000184113.7,ENSMUST00000176780.7,ENSMUST00000196926.1,ENSMUST00000108300.7,ENSMUST00000176535.7,ENSMUST00000175857.1,ENSMUST00000177055.7,ENSMUST00000108298.8,ENSMUST00000150061.1,ENSMUST00000176908.1,ENSMUST00000108296.5	nonsense_mediated_decay,retained_intron,protein_coding	0.628076	4.64513	1.74262e-05	0.00137417	Epithelial Cell Transforming 2	guanine nucleotide exchange factor and transforming protein that is related to Rho-specific exchange factors and yeast cell cycle regulators, Promotes guanine nucleotide exchange on the Rho family members of small GTPases, like RHOA, RHOC, RAC1 and CDC42. Guanine nucleotide exchange factor (GEF) that catalyzes the exchange of GDP for GTP. Promotes guanine nucleotide exchange on the Rho family mem…	https://www.ncbi.nlm.nih.gov/pmc/articles/PMC444862/	Signaling	3.05	Rho/Rac	Rho	Involved in the regulation of epithelial cell polarity; participates in the formation of epithelial tight junctions in a polarity complex PARD3-PARD6-protein kinase PRKCQ-dependent manner.	GEF, RhoA, cell poalrity
ENSMUSG00000021697	Depdc1b	ENSMUST00000171178.1,ENSMUST00000167413.7,ENSMUST00000168037.1,ENSMUST00000172402.1,ENSMUST00000163307.7,ENSMUST00000051594.11	nonsense_mediated_decay,processed_transcript,retained_intron,protein_coding	0.637363	2.99302	0.000143458	0.00605397	DEP Domain Containing 1B	Rho signaling? proliferation?	https://jbiomedsci.biomedcentral.com/articles/10.1186/s12929-014-0067-1	Signaling	3.05	Rho/Rac	Rac1
ENSMUSG00000048373	Fgfbp1	ENSMUST00000199894.1,ENSMUST00000061299.8,ENSMUST00000199481.1	protein_coding	-0.467469	6.20299	3.909e-09	6.55677e-06	Fibroblast Growth Factor Binding Protein 1	This gene encodes a secreted fibroblast growth factor carrier protein. The encoded protein plays a critical role in cell proliferation, differentiation and migration by binding to fibroblast growth factors and potentiating their biological effects on target cells. The encoded protein may also play a role in tumor growth as an angiogenic switch molecule, and expression of this gene has been associ…	https://pubmed.ncbi.nlm.nih.gov/25139991/	Signaling	3.06	PI		Enhance FGF signaling, so signaling will be lower with APOE4. FGF is importnant for recovery of endothelial cells. FGF receptor activation results in PI3K, PLCgamma-Ca2+/IP3-camKII signaling	FGF binding, IP3 (calcium-CamKII)
ENSMUSG00000031834	Pik3r2	ENSMUST00000154685.1,ENSMUST00000152545.1,ENSMUST00000143785.1,ENSMUST00000142370.1,ENSMUST00000146707.1,ENSMUST00000034296.14	processed_transcript,retained_intron,protein_coding	-0.368232	4.42516	8.69639e-06	0.000833598	Phosphoinositide-3-Kinase Regulatory Subunit 2	Regulatory subunit of phosphoinositide-3-kinase (PI3K), a kinase that phosphorylates PtdIns(4,5)P2 (Phosphatidylinositol 4,5-bisphosphate) to generate phosphatidylinositol 3,4,5-trisphosphate (PIP3). PIP3 plays a key role by recruiting PH domain-containing proteins to the membrane, including AKT1 and PDPK1, activating signaling cascades involved in cell growth, survival, proliferation, motility a…	https://www.ncbi.nlm.nih.gov/pmc/articles/PMC6073766/	Signaling	3.06	PI	PI3K	Low mTOR- master regulator of metabolism	akt, mTOR, PKC, metabolism, autophagy
ENSMUSG00000055912	Tmem150a	ENSMUST00000069695.8,ENSMUST00000206064.1,ENSMUST00000206531.1,ENSMUST00000206821.1,ENSMUST00000132243.2	processed_transcript,protein_coding	-0.30885	3.81596	0.00100739	0.0238185	Transmembrane Protein 150A	Regulates localization of phosphatidylinositol 4-kinase (PI4K) to the plasma membrane, possibly by reducing the association of TTC7 (TTC7A or TTC7B) with the PI4K complex (PubMed:25608530). Acts as a regulator of phosphatidylinositol 4-phosphate (PtdIns(4)P) synthesis (PubMed:25608530). May also play a role in fasting-induced catabolism (By similarit		Signaling	3.06	PI	PI4K		golgi cell signaling, PI4K, PLC
ENSMUSG00000034614	Pik3ip1	ENSMUST00000130747.1,ENSMUST00000138907.7,ENSMUST00000153733.1,ENSMUST00000149253.1,ENSMUST00000139139.1,ENSMUST00000136474.1,ENSMUST00000136536.7,ENSMUST00000142961.1,ENSMUST00000045153.10,ENSMUST00000093399.10	processed_transcript,retained_intron,protein_coding	-0.247528	7.86136	4.35668e-05	0.00253003	Phosphoinositide-3-Kinase Interacting Protein 1	transmembrane protein that down-regulates PI3K activity, leading to reduced Akt phosphorylation.	https://www.ncbi.nlm.nih.gov/pubmed/31350312 https://www.jimmunol.org/content/196/1_Supplement/57.9	Signaling	3.06	PI	PI3K	Prediction is higher PI3K activity	PI3K
ENSMUSG00000040479	Dgkz	ENSMUST00000148297.1,ENSMUST00000138894.1,ENSMUST00000134103.1,ENSMUST00000126473.1,ENSMUST00000111303.1,ENSMUST00000124427.1,ENSMUST00000142231.7,ENSMUST00000130023.1,ENSMUST00000128902.7,ENSMUST00000028667.9,ENSMUST00000128152.7,ENSMUST00000142090.7,ENSMUST00000099709.9	nonsense_mediated_decay,processed_transcript,retained_intron,protein_coding	-0.204126	7.76946	0.000240211	0.00866533	Diacylglycerol Kinase Zeta	Displays a strong preference for 1,2-diacylglycerols over 1,3-diacylglycerols, but lacks substrate specificity among molecular species of long chain diacylglycerols. Isoform 2 but not isoform 1 regulates RASGRP1 activity (PubMed:11257115). Positively regulates insulin-induced translocation of SLC2A4 to the cell membrane in adipocytes (By similarity). Activates PIP5K1A activity via generation of p…	https://www.oatext.com/The-rare-allele-of-DGKZ-SNP-rs10838599-is-associated-with-variability-in-HDL-cholesterol-levels-among-severely-obese-patients.php	Signaling	3.06	PI	IP3 DAG PKC	DAG and mTOR activation. So low levels = less mTOR	DAG and mTOR activation.PKCalpha inhibition, So low levels = less mTOR
ENSMUSG00000016933	Plcg1	ENSMUST00000103115.7,ENSMUST00000173791.7,ENSMUST00000147254.1,ENSMUST00000151590.7,ENSMUST00000124652.7,ENSMUST00000109462.7,ENSMUST00000173335.7,ENSMUST00000143997.1,ENSMUST00000129568.1,ENSMUST00000017077.13,ENSMUST00000173061.1,ENSMUST00000174885.1	nonsense_mediated_decay,processed_transcript,retained_intron,protein_coding	-0.185177	8.74199	0.000741148	0.0195205	Phospholipase C, gamma 1	The protein encoded by this gene catalyzes the formation of inositol 1,4,5-trisphosphate and diacylglycerol from phosphatidylinositol 4,5-bisphosphate. This reaction uses calcium as a cofactor and plays an important role in the intracellular transduction of receptor-mediated tyrosine kinase activators. For example, when activated by SRC, the encoded protein causes the Ras guanine nucleotide excha…	https://www.ncbi.nlm.nih.gov/pmc/articles/PMC196067/	Signaling	3.06	PI	IP3 DAG PKC	Lower IP3 and DAG processing	IP3, DAG, calcium
ENSMUSG00000034354	Mtmr3	ENSMUST00000144242.1,ENSMUST00000130716.7,ENSMUST00000123506.7,ENSMUST00000040448.12,ENSMUST00000155566.7,ENSMUST00000128256.1,ENSMUST00000109943.9	nonsense_mediated_decay,processed_transcript,protein_coding	-0.177881	6.80233	2.80644e-05	0.00188274	Myotubularin Related Protein 3	This gene encodes a member of the myotubularin dual specificity protein phosphatase gene family. The encoded protein is structurally similar to myotubularin but in addition contains a FYVE domain and an N-terminal PH-GRAM domain. The protein can self-associate and also form heteromers with another myotubularin related protein. The protein binds to phosphoinositide lipids through the PH-GRAM domai…		Signaling	3.06	PI		Lipid phosphatase, also regulates Polo-like kinase, low levels result in lower PIP3 siganling, similar to low PI3K?	Lipid phosphatase, PIP2-PIP3 siganling, PI3K,
ENSMUSG00000021108	Prkch	ENSMUST00000021527.14,ENSMUST00000119092.1	protein_coding	-0.147087	8.11056	0.0025025	0.0444757	Protein kinase C eta	alcium-independent, phospholipid- and diacylglycerol (DAG)-dependent serine/threonine-protein kinase that is involved in the regulation of cell differentiation in keratinocytes and pre-B cell receptor, mediates regulation of epithelial tight junction integrity and foam cell formation, and is required for glioblastoma proliferation and apoptosis prevention in MCF-7 cells. In keratinocytes, binds a…	https://www.ncbi.nlm.nih.gov/pubmed/23436195	Signaling	3.06	PI	IP3 DAG PKC		DAG dependent activation, occludin phosphorylation, reduces lipid droplet size
ENSMUSG00000021411	Pxdc1	ENSMUST00000021847.14,ENSMUST00000125037.2,ENSMUST00000152392.1,ENSMUST00000053459.13	nonsense_mediated_decay,protein_coding	0.175243	6.16401	0.00262802	0.0459985	PX Domain Containing 1	PXDC1 (PX Domain Containing 1) is a Protein Coding gene. Gene Ontology (GO) annotations related to this gene include phosphatidylinositol binding.		Signaling	3.06	PI	?
ENSMUSG00000031557	Plekha2	ENSMUST00000125466.1,ENSMUST00000098866.10,ENSMUST00000128715.7,ENSMUST00000211708.1,ENSMUST00000064883.13	processed_transcript,protein_coding	0.203151	5.03347	0.00117319	0.0263136	Pleckstrin Homology Domain Containing A2	Binds specifically to phosphatidylinositol 3,4-diphosphate (PtdIns3,4P2), but not to other phosphoinositides. May recruit other proteins to the plasma membrane (By similarity).		Signaling	3.06	PI			phospholipsae signaling
ENSMUSG00000027456	Sdcbp2	ENSMUST00000028950.8	protein_coding	0.419392	5.48163	0.000101196	0.00470866	Syndecan Binding Protein 2	The protein encoded by this gene contains two class II PDZ domains. PDZ domains facilitate protein-protein interactions by binding to the cytoplasmic C-terminus of transmembrane proteins, and PDZ-containing proteins mediate cell signaling and the organization of protein complexes. The encoded protein binds to phosphatidylinositol 4, 5-bisphosphate (PIP2) and plays a role in nuclear PIP2 organizat…		Signaling	3.06	PI			PIP2 binding, IPS-DAG, calcium, lipid plasma membrane trafficking, exosomes
ENSMUSG00000034330	Plcg2	ENSMUST00000081232.8	protein_coding	0.420413	4.85342	6.39564e-07	0.000149725	Phospholipase C Gamma 2	The protein encoded by this gene is a transmembrane signaling enzyme that catalyzes the conversion of 1-phosphatidyl-1D-myo-inositol 4,5-bisphosphate to 1D-myo-inositol 1,4,5-trisphosphate (IP3) and diacylglycerol (DAG) using calcium as a cofactor. IP3 and DAG are second messenger molecules important for transmitting signals from growth factor receptors and immune system receptors across the cell…	https://www.ncbi.nlm.nih.gov/pmc/articles/PMC6359863/ https://www.cell.com/molecular-cell/pdf/S1097-2765(12)00864-7.pdf	Signaling	3.06	PI	IP3 DAG PKC	Mutation is protective for AD increases its activity, involved in VE-caherin signaling and AJ stabilizaion	Produce IP3 and DAG, calcium
ENSMUSG00000028159	Dapp1	ENSMUST00000199541.1,ENSMUST00000200596.1,ENSMUST00000029806.12,ENSMUST00000154716.1,ENSMUST00000124827.7,ENSMUST00000136613.3,ENSMUST00000184222.5	processed_transcript,retained_intron,protein_coding	0.526748	2.00917	0.000383269	0.0122438	Dual Adaptor Of Phosphotyrosine And 3-Phosphoinositides 1	May act as a B-cell-associated adapter that regulates B-cell antigen receptor (BCR)-signaling downstream of PI3K.		Signaling	3.06	PI	PI3K	D3 phosphoinositides PI(3,4,5)P3 and PI(3,4)P2	PI3K signaling
ENSMUSG00000039936	Pik3cd	ENSMUST00000146612.7,ENSMUST00000131224.7,ENSMUST00000105690.8,ENSMUST00000105688.9,ENSMUST00000156309.1,ENSMUST00000105689.7,ENSMUST00000118704.7,ENSMUST00000137430.7,ENSMUST00000122059.7,ENSMUST00000134534.7,ENSMUST00000127273.7,ENSMUST00000177654.7,ENSMUST00000038859.13,ENSMUST00000124510.1	processed_transcript,protein_coding	0.599586	1.40388	0.00112604	0.025666	PI3K-Delta	Phosphoinositide-3-kinase (PI3K) that phosphorylates PtdIns(4,5)P2 (Phosphatidylinositol 4,5-bisphosphate) to generate phosphatidylinositol 3,4,5-trisphosphate (PIP3). PIP3 plays a key role by recruiting PH domain-containing proteins to the membrane, including AKT1 and PDPK1, activating signaling cascades involved in cell growth, survival, proliferation, motility and morphology. Mediates immune r…	https://pubmed.ncbi.nlm.nih.gov/?term=PI3K-Delta&sort=pubdate	Signaling	3.06	PI	PI3K		PI3Kdelta, inflammation
ENSMUSG00000019256	Ahr	ENSMUST00000173414.1,ENSMUST00000110811.2,ENSMUST00000116436.8	nonsense_mediated_decay,retained_intron,protein_coding	-0.629968	4.91163	2.85988e-09	6.42728e-06	Aryl hydrocarbon receptor	Activated by xenbiotics and changes in oxygen/ROS it does a lot of things- TF for	https://www.ncbi.nlm.nih.gov/pubmed/24727683 https://www.nature.com/articles/s41577-019-0125-8#Sec10 https://www.ncbi.nlm.nih.gov/pmc/articles/PMC3148414/pdf/nihms310441.pdf https://www.ncbi.nlm.nih.gov/pubmed/15183014	Signaling	3.13	AHR		This is a major major gene. It is activated by xenobiotics, but endogenously oxygen levels and tryptophan metaboliotes, bilruven (i.e. heme), indoles from the diet (vegtables) and indoles from microbials . Functioanlly is involved is a lot of processess, KO results in endothelial cell dysfunction in the liver. Signaling, limits STAT signaing, involved in RAR and KLFs. Increases IL-10, also poteti…	AHR, inflamamtion, heme, vascualr development, epithelial cell recovery, hypertension control, angiotensin, tryptophan, STAT, wnt, per1, stat, rar,		https://pubmed.ncbi.nlm.nih.gov/32611766/ https://link.springer.com/article/10.1007/s10753-020-01259-0	https://www.sigmaaldrich.com/catalog/product/sigma/sml1489?lang=en&region=US
ENSMUSG00000023150	Ivns1abp	ENSMUST00000186745.1,ENSMUST00000097543.7,ENSMUST00000111887.9,ENSMUST00000190872.1,ENSMUST00000023918.12	nonsense_mediated_decay,protein_coding	-0.203068	6.87077	0.000980177	0.0235411	Influenza Virus NS1A Binding Protein	Involved in many cell functions, including pre-mRNA splicing, the aryl hydrocarbon receptor (AHR) pathway, F-actin organization and protein ubiquitination. Plays a role in the dynamic organization of the actin skeleton as a stabilizer of actin filaments by association with F-actin through Kelch repeats (By similarity). Protects cells from cell death induced by actin destabilization (By similarity…		Signaling	3.13	AHR			AHR, protects cell from actin disorganization, binds F actin
ENSMUSG00000023055	Calcoco1	ENSMUST00000171838.1,ENSMUST00000023818.9,ENSMUST00000166943.1,ENSMUST00000168112.7	retained_intron,protein_coding	-0.18098	6.61178	0.000222331	0.00817785	Calcium Binding And Coiled-Coil Domain 1	Functions as a coactivator for aryl hydrocarbon and nuclear receptors (NR). Recruited to promoters through its contact with the N-terminal basic helix-loop-helix-Per-Arnt-Sim (PAS) domain of transcription factors or coactivators, such as NCOA2. During ER-activation acts synergistically in combination with other NCOA2-binding proteins, such as EP300, CREBBP and CARM1. Involved in the transcription…	https://pubmed.ncbi.nlm.nih.gov/16931570/	Signaling	3.13	AHR	AHR	co-receptor for nuclear receptors	Calcium-metabolism linker, wnt, nuclear receptor
ENSMUSG00000030170	Wnt5b	ENSMUST00000119369.1,ENSMUST00000118120.7,ENSMUST00000117171.7,ENSMUST00000178696.7	protein_coding	0.68024	2.04173	7.05041e-05	0.00359725	Wnt Family Member 5B	The WNT gene family consists of structurally related genes which encode secreted signaling proteins. These proteins have been implicated in oncogenesis and in several developmental processes, including regulation of cell fate and patterning during embryogenesis.. Induces proliferation and survival of endothelial cells in vitro	https://www.ncbi.nlm.nih.gov/pubmed/15796911 https://biosignaling.biomedcentral.com/articles/10.1186/s12964-019-0419-2	Signaling	3.07	wnt		Actiavte wnt signalign causes a lot functions	ROR binding, calcium, PKC, beta catenin
ENSMUSG00000028476	Reck	ENSMUST00000030198.6,ENSMUST00000130415.1,ENSMUST00000128463.7	processed_transcript,protein_coding	0.270204	5.35463	6.16205e-05	0.00326618	Reversion Inducing Cysteine Rich Protein With Kazal Motifs	The protein encoded by this gene is a cysteine-rich, extracellular protein with protease inhibitor-like domains whose expression is suppressed strongly in many tumors and cells transformed by various kinds of oncogenes. In normal cells, this membrane-anchored glycoprotein may serve as a negative regulator for matrix metalloproteinase-9, a key enzyme involved in tumor invasion and metastasis. Seve…	https://www.nature.com/articles/srep17860	Signaling	3.07	wnt		Major protein for endothelial cell development, vascualr patterning	WNT7, Negative regulator of MMP9
ENSMUSG00000029071	Dvl1	ENSMUST00000140529.1,ENSMUST00000133184.7,ENSMUST00000030948.15,ENSMUST00000129450.1,ENSMUST00000156997.7,ENSMUST00000168552.1,ENSMUST00000141539.7,ENSMUST00000143457.7	processed_transcript,retained_intron,protein_coding	-0.177691	7.02245	0.000304608	0.0102175	Dishevelled Segment Polarity Protein 1	Participates in Wnt signaling by binding to the cytoplasmic C-terminus of frizzled family members and transducing the Wnt signal to down-stream effectors. Plays a role both in canonical and non-canonical Wnt signaling. Plays a role in the signal transduction pathways mediated by multiple Wnt genes. Required for LEF1 activation upon WNT1 and WNT3A signaling. DVL1 and PAK1 form a ternary complex wi…	https://pubmed.ncbi.nlm.nih.gov/28674110/?from_term=Dvl1+endothelial+cell&from_sort=pubdate&from_pos=1	Signaling	3.07	wnt			wnt signaling, JNK activation
ENSMUSG00000031661	Nkd1	ENSMUST00000211113.1,ENSMUST00000034086.12,ENSMUST00000169179.2	protein_coding	-0.213694	5.29087	0.000326149	0.0107951	NKD Inhibitor Of WNT Signaling Pathway 1	NKD1 (NKD Inhibitor Of WNT Signaling Pathway 1) is a Protein Coding gene. Among its related pathways are Hippo signaling pathway and Wnt Signaling Pathway and Pluripotency. Gene Ontology (GO) annotations related to this gene include calcium ion binding and PDZ domain binding. An important paralog of this gene is NKD2.		Signaling	3.07	wnt			wnt signaling, cell differentiation
ENSMUSG00000027692	Tnik	ENSMUST00000159680.8,ENSMUST00000160307.8,ENSMUST00000162777.7,ENSMUST00000193721.1,ENSMUST00000159236.8,ENSMUST00000161423.1,ENSMUST00000162485.7,ENSMUST00000192205.1,ENSMUST00000160518.7,ENSMUST00000159308.7,ENSMUST00000161234.7,ENSMUST00000162037.8,ENSMUST00000161214.7,ENSMUST00000159733.1,ENSMUST00000195094.1,ENSMUST00000162225.1,ENSMUST00000161964.1,ENSMUST00000160934.7	nonsense_mediated_decay,processed_transcript,retained_intron,protein_coding	-0.241685	4.8014	0.00268421	0.0465112	TRAF2 And NCK Interacting Kinase	Serine/threonine kinase that acts as an essential activator of the Wnt signaling pathway. Recruited to promoters of Wnt target genes and required to activate their expression. May act by phosphorylating TCF4/TCF7L2. Appears to act upstream of the JUN N-terminal pathway. May play a role in the response to environmental stress. Part of a signaling complex composed of NEDD4, RAP2A and TNIK which reg…		Signaling	3.07	wnt			wnt signaling, actin remodelling
ENSMUSG00000020888	Dvl2	ENSMUST00000130820.7,ENSMUST00000152732.1,ENSMUST00000102575.8,ENSMUST00000190940.1,ENSMUST00000135422.1,ENSMUST00000149477.1,ENSMUST00000019362.14	nonsense_mediated_decay,retained_intron,protein_coding	-0.282985	3.92669	0.000168895	0.006754	Dishevelled Segment Polarity Protein 2	Plays a role in the signal transduction pathways mediated by multiple Wnt genes. Participates both in canonical and non-canonical Wnt signaling by binding to the cytoplasmic C-terminus of frizzled family members and transducing the Wnt signal to down-stream effectors. Promotes internalization and degradation of frizzled proteins upon Wnt signaling.		Signaling	3.07	wnt			wnt signaling
ENSMUSG00000022999	Lmbr1l	ENSMUST00000109127.7,ENSMUST00000126159.1,ENSMUST00000123950.7,ENSMUST00000135051.1,ENSMUST00000023736.8,ENSMUST00000128818.1,ENSMUST00000127548.1	processed_transcript,retained_intron,protein_coding	-0.285721	5.05687	0.000106711	0.00492449	Limb Development Membrane Protein 1 Like	Plays an essential role in lymphocyte development by negatively regulating the canonical Wnt signaling pathway (By similarity). In association with UBAC2 and E3 ubiquitin-protein ligase AMFR, promotes the ubiquitin-mediated degradation of CTNNB1 and Wnt receptors FZD6 and LRP6 (By similarity). LMBR1L stabilizes the beta-catenin destruction complex that is required for regulating CTNNB1 levels (By…	https://science.sciencemag.org/content/364/6440/eaau0812	Signaling	3.07	wnt			wnt-beta catenin signaling,
ENSMUSG00000030235	Slco1c1	ENSMUST00000032362.11,ENSMUST00000204998.2,ENSMUST00000203140.1,ENSMUST00000203755.1,ENSMUST00000135562.7,ENSMUST00000205214.2	nonsense_mediated_decay,retained_intron,protein_coding	-0.312725	6.35435	0.000988219	0.0236772	Solute Carrier Organic Anion Transporter Family Member 1C	he sodium-independent uptake of thyroid hormones in brain tissues.		Signaling	3.08	thyroid			Thyroid hormones transport
ENSMUSG00000030237	Slco1a4	ENSMUST00000163678.1,ENSMUST00000204676.1,ENSMUST00000032364.13,ENSMUST00000165990.7	retained_intron,protein_coding	-0.289007	8.34492	0.00270408	0.0467834	Solute carrier organic anion transporter family member 1A4	Mediates the Na+-independent transport of organic anions such as taurocholate, cholate, 17-beta-glucuronosyl estradiol, estrone-3-sulfate, the cardiac glycosides ouabain and digoxin and thyroid hormones.		Signaling	3.08	thyroid			aurocholate, cholate, 17-beta-glucuronosyl estradiol, estrone-3-sulfate
ENSMUSG00000045757	Zfp764	ENSMUST00000059199.6,ENSMUST00000139118.1	processed_transcript,protein_coding	-0.284845	3.43757	0.00166443	0.0337804	Zinc Finger Protein 764	ZNF764 (Zinc Finger Protein 764) is a Protein Coding gene. Diseases associated with ZNF764 include Thyroid Hormone Resistance, Generalized, Autosomal Dominant. Among its related pathways are Gene Expression and Herpes simplex virus 1 infection. Gene Ontology (GO) annotations related to this gene include nucleic acid binding. An important paralog of this gene is ZNF747.		Signaling	3.08	thyroid			Gene transcription, zinc finger protein
ENSMUSG00000058756	Thra	ENSMUST00000124072.1,ENSMUST00000124130.1,ENSMUST00000152195.6,ENSMUST00000150693.1,ENSMUST00000153043.7,ENSMUST00000103139.10,ENSMUST00000064187.11,ENSMUST00000142944.7,ENSMUST00000153468.7	processed_transcript,protein_coding	-0.233293	6.60937	9.30441e-05	0.00444909	Thyroid Hormone Receptor Alpha	The protein encoded by this gene is a nuclear hormone receptor for triiodothyronine. It is one of the several receptors for thyroid hormone, and has been shown to mediate the biological activities of thyroid hormone. Knockout studies in mice suggest that the different receptors, while having certain extent of redundancy, may mediate different functions of thyroid hormone. Alternatively spliced tr…	https://pubmed.ncbi.nlm.nih.gov/25489922/	Signaling	3.08	Thyroid			Thyroid hormone signaling, higher thryoid signaling is benificial for eNOS and CBF
ENSMUSG00000019487	Trip10	ENSMUST00000019631.9	protein_coding	-0.20864	5.84109	0.000229074	0.0083575	Thyroid Hormone Receptor Interactor 10	Required for translocation of GLUT4 to the plasma membrane in response to insulin signaling (By similarity). Required to coordinate membrane tubulation with reorganization of the actin cytoskeleton during endocytosis. Binds to lipids such as phosphatidylinositol 4,5-bisphosphate and phosphatidylserine and promotes membrane invagination and the formation of tubules. Also promotes CDC42-induced act…		Signaling	3.08	thyroid			Endocytosis regulator, insulin signaling, GLUT4
ENSMUSG00000066456	Hmgn3	ENSMUST00000185315.6,ENSMUST00000190154.1,ENSMUST00000190580.1,ENSMUST00000185359.1,ENSMUST00000162246.8,ENSMUST00000187193.6,ENSMUST00000191105.1,ENSMUST00000189777.1,ENSMUST00000161796.8	nonsense_mediated_decay,processed_transcript,retained_intron,protein_coding	0.366714	4.93179	4.57619e-06	0.000524721	High Mobility Group Nucleosomal Binding Domain 3	The protein encoded by this gene binds thyroid hormone receptor beta in the presence of thyroid hormone. The encoded protein, a member of the HMGN protein family, is thought to reduce the compactness of the chromatin fiber in nucleosomes, thereby enhancing transcription from chromatin templates. Alternatively spliced transcript variants encoding different isoforms have been found for this gene. T…		Signaling	3.08	thyroid		Insulin, glucose and glycine transporter regulation	Regulated gene transcription, insulin, glucose
[truncated: 811 more rows]

## Sheet: F3. IPA Canonical Pathways
© 2000-2020 QIAGEN. All rights reserved.
Ingenuity Canonical Pathways	-log(p-value)	Ratio	z-score	Molecules
[truncated: 110 more rows]

## Sheet: F4. Glycolysis vs OXPHOS
Figure 4A. ATP (pmol/cell)												Figure 4B-C. Total ATP Production Rate (pmol/min) & % Glycolysis															Figure 4D. Rate of Glucose Uptake											Figure 4E. Lactate
[truncated: 47 more rows]

[truncated: 12 more sheets: F5. ROS & Antioxidants, F6. Oxidative Stress, F7. Plasma Membrane & Lipids, F7. Metabolomics Pathways, F8. Baseline Inflammation, F9. LPS Inflammation, F10. Baseline SR9009, F11. LPS SR9009, FS1. ApoE Native Gel, FS2. Mitochondrial Function, FS3. Lipid Metabolism, FS4. LPS & LPS SR9009 ApoE]
